# Supplementary material for: Binding of base-stabilized borylenes with transition metals and formation of metal only Lewis pairs
Source: Royal Society of Chemistry journal article supplement (doi:10.1039/d4dt02914c), 2024-11-20
Supplement: d4dt02914c1.pdf [file d4dt02914c1.pdf]

# Electronic Supplementary Information

## Binding of Base-Stabilized Borylenes with Transition Metals and Formation of Metal Only Lewis Pairs

Barsha Chakraborty,<sup>†</sup> Raj Rishi Hazarika,<sup>†</sup> Holger Braunschweig<sup>‡\*</sup> and Ashwini K. Phukan<sup>†\*</sup>

<sup>†</sup>Department of Chemical Sciences, Tezpur University, Napaam 784028, Assam, India.

E-mail: [ashwini@tezu.ernet.in](mailto:ashwini@tezu.ernet.in)

<sup>‡</sup>Institute for Inorganic Chemistry and Institute for Sustainable Chemistry & Catalysis with Boron, Julius-Maximilians-Universität Würzburg, Am Hubland, 97074 Würzburg, Germany.

E-mail: [h.braunschweig@uni-wuerzburg.de](mailto:h.braunschweig@uni-wuerzburg.de)

## Contents:

|                  |                                                                                                                                                                                                                                                                                                                                         |   |
|------------------|-----------------------------------------------------------------------------------------------------------------------------------------------------------------------------------------------------------------------------------------------------------------------------------------------------------------------------------------|---|
| <b>Table S1.</b> | SMD(benzene)-M06-2X-D3/6-311+G* calculated reaction free energies ( $\Delta G^\circ$ in kcal mol <sup>-1</sup> ) for the formation of Fe(CO) <sub>4</sub> L and Ni(CO) <sub>3</sub> L complexes                                                                                                                                         | 5 |
| <b>Table S2.</b> | SMD(benzene)-M06-2X-D3/6-311+G* calculated M–L (M=Fe and Ni, L= <b>a-i</b> ) bond lengths (in Å) and their corresponding Wiberg Bond Indices (WBI) given within parentheses for Fe(CO) <sub>4</sub> L and Ni(CO) <sub>3</sub> L complexes, respectively.                                                                                | 5 |
| <b>Table S3.</b> | SMD(benzene)-M06-2X-D3/6-311+G* calculated reaction free energies ( $\Delta G$ in kcal mol <sup>-1</sup> ) and HOMO-LUMO gaps ( $\Delta E_{H-L}$ in eV) of (1) Fe, and (2) Ni based MOLPs.                                                                                                                                              | 6 |
| <b>Table S4.</b> | SMD(benzene)-M06-2X-D3/6-311+G* calculated energies of the lone pair orbital ( $E_{LP}$ ) of free ligands (L) and metal centers (in eV) in Fe(CO) <sub>4</sub> L, and Ni(CO) <sub>3</sub> L respectively.                                                                                                                               | 6 |
| <b>Table S5.</b> | SMD(benzene)-M06-2X-D3/6-311+G* calculated sum of the angles around Ga ( $\Sigma_{ClGaCl}$ ) and Ga Pyramidalization ( $360^\circ - \Sigma_{ClGaCl}$ ) at the Ga center of the Fe and Ni based MOLPs for the ligands under consideration (L= <b>a-i</b> ).                                                                              | 7 |
| <b>Table S6.</b> | SMD(benzene)-M06-2X-D3/6-311+G* natural charges of the donor atoms ( $q_E$ ) in free ligands L (L= <b>a-i</b> ), metal complexes Fe(CO) <sub>4</sub> L and Ni(CO) <sub>3</sub> L their corresponding GaCl <sub>3</sub> adducts ([L(CO) <sub>4</sub> Fe→GaCl <sub>3</sub> ] and [L(CO) <sub>3</sub> Ni→GaCl <sub>3</sub> ] respectively. | 7 |
| <b>Table S7.</b> | SMD(benzene)-M06-2X-D3/6-311+G* valence population of the donor atoms ( $Val_E$ ) in free ligands L (L= <b>a-i</b> ), metal complexes Fe(CO) <sub>4</sub> L and                                                                                                                                                                         | 8 |

Ni(CO)<sub>3</sub>L, and their corresponding GaCl<sub>3</sub> adducts [L(CO)<sub>4</sub>Fe→GaCl<sub>3</sub>] and [L(CO)<sub>3</sub>Ni→GaCl<sub>3</sub>] respectively.

|                  |                                                                                                                                                                                                                                                                                                               |    |
|------------------|---------------------------------------------------------------------------------------------------------------------------------------------------------------------------------------------------------------------------------------------------------------------------------------------------------------|----|
| <b>Table S8.</b> | Calculated important AIM parameters such as electron density at the BCP ( $\rho_b$ ), laplacian of electron density ( $\nabla^2\rho_b$ ), local energy density $H_b(r)$ and delocalization index (DI) of the L–M (L = <b>a-i</b> , M = Fe, Ni ) bonds for all the MOLPs. All the tabulated values are in a.u. | 8  |
| <b>Fig. S1.</b>  | Correlation plot between the pyramidalization angle at the Ga center ( $\Theta_{\text{Ga}}$ in degree) of the MOLPs of (a) Fe and (b) Ni and the energies of the lone pair orbitals concentrated at Fe and Ni respectively.                                                                                   | 9  |
| <b>Fig S2.</b>   | Contour plots of Laplacian of the electron density ( $\nabla^2\rho_b$ ) in the L–M–CO (M = Fe and Ni) plane showing the bonding of the ligands L (L= <b>d</b> and <b>f</b> as representative cases) to the metal complex.                                                                                     | 10 |
| <b>Fig S3</b>    | Contour plots of Laplacian of the electron density ( $\nabla^2\rho_b$ ) in the M–Ga–Cl (M = Fe and Ni) plane showing the bonding of the Fe(CO) <sub>4</sub> L and Ni(CO) <sub>3</sub> L (L= <b>d</b> and <b>f</b> as representative cases) complexes respectively to GaCl <sub>3</sub> .                      | 11 |
| <b>Fig. S4.</b>  | Correlation plot between the L–Fe (L = <b>a-i</b> ) bond distances and electron density at the bond critical point of the L–Fe bonds of Fe(CO) <sub>4</sub> L (Omitting the point corresponding to L = <b>1c</b> ).                                                                                           | 12 |
| <b>Fig. S5.</b>  | Correlation plot between the L–Ni (L = <b>a-i</b> ) bond distances and electron density at the bond critical point of the L–Ni bonds of Ni(CO) <sub>3</sub> L (Omitting the point corresponding to L = <b>1b</b> ).                                                                                           | 13 |
| <b>Fig. S6.</b>  | Correlation plot between the Fe–Ga bond distances and electron density at the bond critical point of the Fe–Ga bond for the Fe MOLPs.                                                                                                                                                                         | 13 |

|                 |                                                                                                                                                     |       |
|-----------------|-----------------------------------------------------------------------------------------------------------------------------------------------------|-------|
| <b>Fig. S7.</b> | Correlation plot between the Ni–Ga bond distances and electron density at the bond critical point of the Ni–Ga bond for the Ni MOLPs.               | 13    |
| <b>Fig. S8.</b> | Correlation plot between the calculated interaction energy values and the gallium pyramidalization at Ga center of the Fe–Ga bond for the Fe MOLPs. | 14    |
| <b>Fig. S9.</b> | Correlation plot between the calculated interaction energy values and the gallium pyramidalization at Ga center of the Ni–Ga bond for the Ni MOLPs. | 14    |
|                 | Cartesian coordinates of all the optimized geometries                                                                                               | 15-65 |

**Table S1:** SMD(benzene)-M06-2X-D3/6-311+G\* calculated reaction free energies ( $\Delta G^\circ$ , in kcal mol<sup>-1</sup>) for the formation of Fe(CO)<sub>4</sub>L and Ni(CO)<sub>3</sub>L complexes.

| <b>L</b> | $\Delta G_{\text{Fe(CO)}_4\text{L}}$ | $\Delta G_{\text{Ni(CO)}_3\text{L}}$ |
|----------|--------------------------------------|--------------------------------------|
| <b>b</b> | -7.4                                 | -1.1                                 |
| <b>c</b> | -9.6                                 | -4.1                                 |
| <b>d</b> | -14.0                                | -9.3                                 |
| <b>e</b> | -14.0                                | -7.0                                 |
| <b>f</b> | 12.5                                 | 10.6                                 |
| <b>g</b> | 10.0                                 | 4.5                                  |
| <b>h</b> | -4.2                                 | 4.4                                  |
| <b>i</b> | 1.6                                  | -1.8                                 |

**Table S2:** SMD(benzene)-M06-2X-D3/6-311+G\* calculated M–L (M=Fe and Ni, L=**a-i**) bond lengths (in Å) and their corresponding Wiberg Bond Indices (WBI) given within parentheses for Fe(CO)<sub>4</sub>L and Ni(CO)<sub>3</sub>L complexes, respectively.

| <b>Ligands</b> | <b>Fe-L</b>  | <b>Ni-L</b>  |
|----------------|--------------|--------------|
| <b>a</b>       | 1.884(1.033) | 1.902(0.866) |
| <b>b</b>       | 2.315(0.816) | 2.313(0.623) |
| <b>c</b>       | 2.080(0.755) | 2.065(0.612) |
| <b>d</b>       | 2.063(0.779) | 2.040(0.625) |
| <b>e</b>       | 2.022(0.802) | 2.029(0.636) |
| <b>f</b>       | 2.124(0.551) | 2.281(0.253) |
| <b>g</b>       | 2.119(0.675) | 2.225(0.349) |
| <b>h</b>       | 2.096(0.691) | 2.118(0.451) |
| <b>i</b>       | 1.991(0.928) | 2.079(0.600) |

**Table S3:** SMD(benzene)-M06-2X-D3/6-311+G\* calculated reaction free energies ( $\Delta G$  in kcal mol<sup>-1</sup>) and HOMO-LUMO gaps ( $\Delta E_{H-L}$  in eV) of (1) Fe, and (2) Ni based MOLPs.

| Molecules                  | $\Delta G^\circ$ | $\Delta E_{H-L}$ | Molecules                  | $\Delta G^\circ$ | $\Delta E_{H-L}$ |
|----------------------------|------------------|------------------|----------------------------|------------------|------------------|
| <b>1a-GaCl<sub>3</sub></b> | -13.6            | 6.95             | <b>2a-GaCl<sub>3</sub></b> | 0.0              | 7.71             |
| <b>1b-GaCl<sub>3</sub></b> | -23.2            | 7.20             | <b>2b-GaCl<sub>3</sub></b> | -12.6            | 7.22             |
| <b>1c-GaCl<sub>3</sub></b> | -24.6            | 7.05             | <b>2c-GaCl<sub>3</sub></b> | -17.1            | 7.28             |
| <b>1d-GaCl<sub>3</sub></b> | -27.5            | 6.79             | <b>2d-GaCl<sub>3</sub></b> | -18.0            | 6.86             |
| <b>1e-GaCl<sub>3</sub></b> | -32.3            | 7.03             | <b>2e-GaCl<sub>3</sub></b> | -17.3            | 7.31             |
| <b>1f-GaCl<sub>3</sub></b> | -12.1            | 5.77             | <b>2f-GaCl<sub>3</sub></b> | -15.9            | 5.24             |
| <b>1g-GaCl<sub>3</sub></b> | -14.4            | 5.26             | <b>2g-GaCl<sub>3</sub></b> | -21.2            | 5.33             |
| <b>1h-GaCl<sub>3</sub></b> | -23.0            | 6.26             | <b>2h-GaCl<sub>3</sub></b> | -24.9            | 5.71             |
| <b>1i-GaCl<sub>3</sub></b> | -32.6            | 5.57             | <b>2i-GaCl<sub>3</sub></b> | -22.1            | 5.42             |

**Table S4:** SMD(benzene)-M06-2X-D3/6-311+G\* calculated energies of the lone pair orbital ( $E_{LP}$ ) of free ligands (L) and metal centers (in eV) in Fe(CO)<sub>4</sub>L, and Ni(CO)<sub>3</sub>L respectively.

| Ligands<br>(L) | $E_{LP}$     |                       |                       |
|----------------|--------------|-----------------------|-----------------------|
|                | Free ligands | Fe(CO) <sub>4</sub> L | Ni(CO) <sub>3</sub> L |
| <b>a</b>       | -12.26       | -7.91                 | -8.22                 |
| <b>b</b>       | -7.48        | -7.20                 | -6.99                 |
| <b>c</b>       | -7.67        | -6.74                 | -6.83                 |
| <b>d</b>       | -6.97        | -6.68                 | -6.58                 |
| <b>e</b>       | -7.78        | -6.82                 | -6.72                 |
| <b>f</b>       | -5.39        | -6.12                 | -5.72                 |
| <b>g</b>       | -5.49        | -6.57                 | -5.74                 |
| <b>h</b>       | -5.59        | -6.43                 | -5.47                 |
| <b>i</b>       | -5.48        | -5.82                 | -5.68                 |

**Table S5:** SMD(benzene)-M06-2X-D3/6-311+G\* calculated sum of the angles around Ga ( $\Sigma_{\text{ClGaCl}}$ ) and Ga Pyramidalization ( $360^\circ - \Sigma_{\text{ClGaCl}}$ ) at the Ga center of the Fe and Ni based MOLPs employing different ligands (L=**a-i**).

| Ligands (L) | $\Sigma_{\text{ClGaCl}}$ |       | Ga Pyramidalization ( $360^\circ - \Sigma_{\text{ClGaCl}}$ ) |      |
|-------------|--------------------------|-------|--------------------------------------------------------------|------|
|             | Fe                       | Ni    | Fe                                                           | Ni   |
| <b>a</b>    | 329.8                    | 342.2 | 30.2                                                         | 17.7 |
| <b>b</b>    | 320.6                    | 335.8 | 39.4                                                         | 24.2 |
| <b>c</b>    | 321.9                    | 331.8 | 38.0                                                         | 28.1 |
| <b>d</b>    | 317.7                    | 329.7 | 42.2                                                         | 30.3 |
| <b>e</b>    | 319.6                    | 332.0 | 40.4                                                         | 27.9 |
| <b>f</b>    | 314.1                    | 324.3 | 45.9                                                         | 35.6 |
| <b>g</b>    | 317.2                    | 325.7 | 42.8                                                         | 34.3 |
| <b>h</b>    | 315.2                    | 326.8 | 44.7                                                         | 33.1 |
| <b>i</b>    | 313.3                    | 328.9 | 46.7                                                         | 31.0 |

**Table S6:** SMD(benzene)-M06-2X-D3/6-311+G\* natural charges of the donor atoms ( $q_E$ ) in free ligands L (L=**a-i**), metal complexes  $\text{Fe}(\text{CO})_4\text{L}$  and  $\text{Ni}(\text{CO})_3\text{L}$  their corresponding  $\text{GaCl}_3$  adducts ( $[\text{L}(\text{CO})_4\text{Fe} \rightarrow \text{GaCl}_3]$  and  $[\text{L}(\text{CO})_3\text{Ni} \rightarrow \text{GaCl}_3]$  respectively).

| Ligands (L) | Donor atom (E)       | $q_E$ (L) | Fe                                       |                                                                    | Ni                                       |                                                                    |
|-------------|----------------------|-----------|------------------------------------------|--------------------------------------------------------------------|------------------------------------------|--------------------------------------------------------------------|
|             |                      |           | $q_E$ $[\text{Fe}(\text{CO})_4\text{L}]$ | $q_E$ $[\text{Fe}(\text{CO})_4\text{L} \rightarrow \text{GaCl}_3]$ | $q_E$ $[\text{Ni}(\text{CO})_3\text{L}]$ | $q_E$ $[\text{Ni}(\text{CO})_3\text{L} \rightarrow \text{GaCl}_3]$ |
| <b>a</b>    | <b>C</b>             | 0.489     | 0.895                                    | 0.917                                                              | 0.726                                    | 0.776                                                              |
| <b>b</b>    | <b>P</b>             | 0.737     | 1.290                                    | 1.289                                                              | 1.060                                    | 1.126                                                              |
| <b>c</b>    | <b>C<sub>c</sub></b> | 0.071     | 0.447                                    | 0.441                                                              | 0.312                                    | 0.333                                                              |
| <b>d</b>    | <b>C<sub>c</sub></b> | 0.102     | 0.503                                    | 0.628                                                              | 0.335                                    | 0.355                                                              |
| <b>e</b>    | <b>C<sub>c</sub></b> | 0.341     | 0.720                                    | 0.748                                                              | 0.570                                    | 0.602                                                              |
| <b>f</b>    | <b>B</b>             | 0.938     | 0.990                                    | 1.317                                                              | 0.982                                    | 0.937                                                              |
| <b>g</b>    | <b>B</b>             | 0.179     | 0.510                                    | 0.712                                                              | 0.205                                    | 0.240                                                              |
| <b>h</b>    | <b>B</b>             | 0.855     | 0.949                                    | 1.161                                                              | 0.814                                    | 0.862                                                              |
| <b>i</b>    | <b>B</b>             | 0.118     | 0.341                                    | 0.699                                                              | 0.308                                    | 0.421                                                              |

**Table S7:** SMD(benzene)-M06-2X-D3/6-311+G\* valence population of the donor atoms ( $\text{Val}_E$ ) in free ligands L ( $L=\mathbf{a-i}$ ), metal complexes  $\text{Fe}(\text{CO})_4\text{L}$  and  $\text{Ni}(\text{CO})_3\text{L}$ , and their corresponding  $\text{GaCl}_3$  adducts  $[\text{L}(\text{CO})_4\text{Fe}\rightarrow\text{GaCl}_3]$  and  $[\text{L}(\text{CO})_3\text{Ni}\rightarrow\text{GaCl}_3]$  respectively.

| Ligands<br>(L) | Donor<br>atom (E)    | $\text{Val}_E$<br>(L) | Fe                                                     |                                                                                      | Ni                                                     |                                                                                      |
|----------------|----------------------|-----------------------|--------------------------------------------------------|--------------------------------------------------------------------------------------|--------------------------------------------------------|--------------------------------------------------------------------------------------|
|                |                      |                       | $\text{Val}_E$<br>[ $\text{Fe}(\text{CO})_4\text{L}$ ] | $\text{Val}_E$<br>[ $\text{Fe}(\text{CO})_4\text{L}$<br>$\rightarrow\text{GaCl}_3$ ] | $\text{Val}_E$<br>[ $\text{Ni}(\text{CO})_3\text{L}$ ] | $\text{Val}_E$<br>[ $\text{Ni}(\text{CO})_3\text{L}\rightarrow$<br>$\text{GaCl}_3$ ] |
| <b>a</b>       | <b>C</b>             | 3.457                 | 3.032                                                  | 3.029                                                                                | 3.197                                                  | 3.158                                                                                |
| <b>b</b>       | <b>P</b>             | 4.212                 | 3.661                                                  | 3.664                                                                                | 3.888                                                  | 3.826                                                                                |
| <b>c</b>       | <b>C<sub>c</sub></b> | 3.893                 | 3.500                                                  | 3.504                                                                                | 3.635                                                  | 3.618                                                                                |
| <b>d</b>       | <b>C<sub>c</sub></b> | 3.870                 | 3.444                                                  | 3.316                                                                                | 3.613                                                  | 3.595                                                                                |
| <b>e</b>       | <b>C<sub>c</sub></b> | 3.620                 | 3.221                                                  | 3.189                                                                                | 3.371                                                  | 3.343                                                                                |
| <b>f</b>       | <b>B</b>             | 2.035                 | 1.957                                                  | 1.595                                                                                | 1.977                                                  | 2.015                                                                                |
| <b>g</b>       | <b>B</b>             | 2.806                 | 2.435                                                  | 2.220                                                                                | 2.762                                                  | 2.719                                                                                |
| <b>h</b>       | <b>B</b>             | 2.126                 | 2.003                                                  | 1.778                                                                                | 2.143                                                  | 2.096                                                                                |
| <b>i</b>       | <b>B</b>             | 2.865                 | 2.613                                                  | 2.237                                                                                | 2.650                                                  | 2.538                                                                                |

**Table S8:** Calculated important AIM parameters such as electron density at the BCP ( $\rho_b$ ), laplacian of electron density ( $\nabla^2\rho_b$ ), local energy density  $H_b(\mathbf{r})$  and delocalization index (DI) of the L–M ( $L = \mathbf{a-i}$ ,  $M = \text{Fe, Ni}$ ) bonds for all the MOLPs. All the tabulated values are in a.u.

| L–M         | AIM<br>Parameters | Ligands (L) |          |          |          |          |          |          |          |          |
|-------------|-------------------|-------------|----------|----------|----------|----------|----------|----------|----------|----------|
|             |                   | <b>a</b>    | <b>b</b> | <b>c</b> | <b>d</b> | <b>e</b> | <b>f</b> | <b>g</b> | <b>h</b> | <b>i</b> |
| <b>L–Fe</b> | $\rho_b$          | 0.105       | 0.071    | 0.078    | 0.083    | 0.089    | 0.079    | 0.077    | 0.084    | 0.102    |
|             | $\nabla^2\rho_b$  | 0.574       | 0.218    | 0.311    | 0.309    | 0.366    | 0.076    | 0.112    | 0.096    | 0.067    |
|             | $H_b(\mathbf{r})$ | -0.026      | -0.016   | -0.015   | -0.018   | -0.043   | -0.027   | -0.023   | -0.028   | -0.041   |
|             | <b>DI</b>         | 0.837       | 0.622    | 0.577    | 0.623    | 0.631    | 0.509    | 0.619    | 0.627    | 0.913    |
| <b>L–Ni</b> | $\rho_b$          | 0.107       | 0.072    | 0.083    | 0.088    | 0.089    | 0.055    | 0.059    | 0.075    | 0.080    |
|             | $\nabla^2\rho_b$  | 0.482       | 0.170    | 0.286    | 0.305    | 0.330    | 0.086    | 0.077    | 0.080    | 0.095    |
|             | $H_b(\mathbf{r})$ | -0.026      | -0.020   | -0.019   | -0.021   | -0.020   | -0.017   | -0.019   | -0.028   | -0.030   |
|             | <b>DI</b>         | 0.853       | 0.615    | 0.587    | 0.633    | 0.621    | 0.257    | 0.385    | 0.470    | 0.623    |



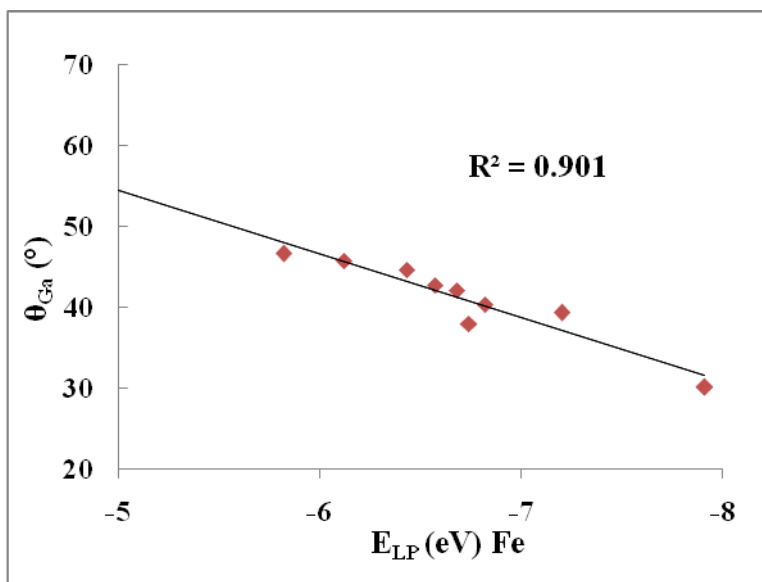

(a)

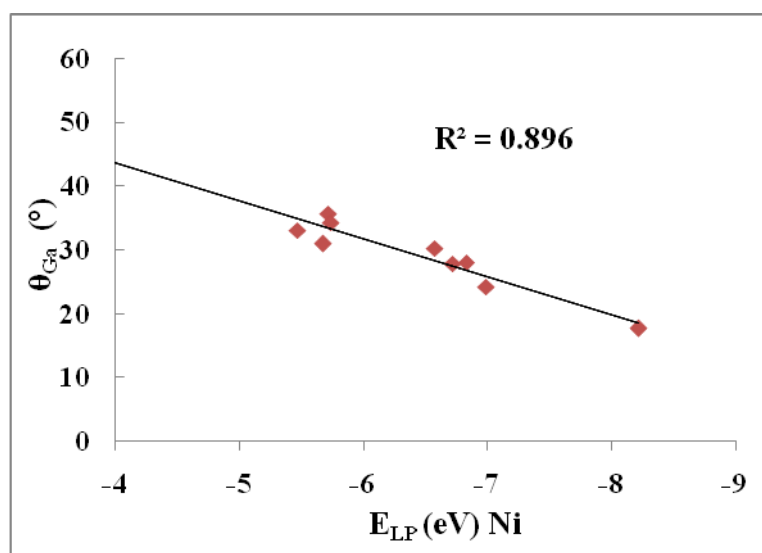

(b)

**Fig. S1:** Correlation plot between the pyramidalization angle at the Ga center ( $\Theta_{Ga}$  in degree) of the MOLPs of (a) Fe and (b) Ni and the energies of the lone pair orbitals concentrated at Fe and Ni respectively.

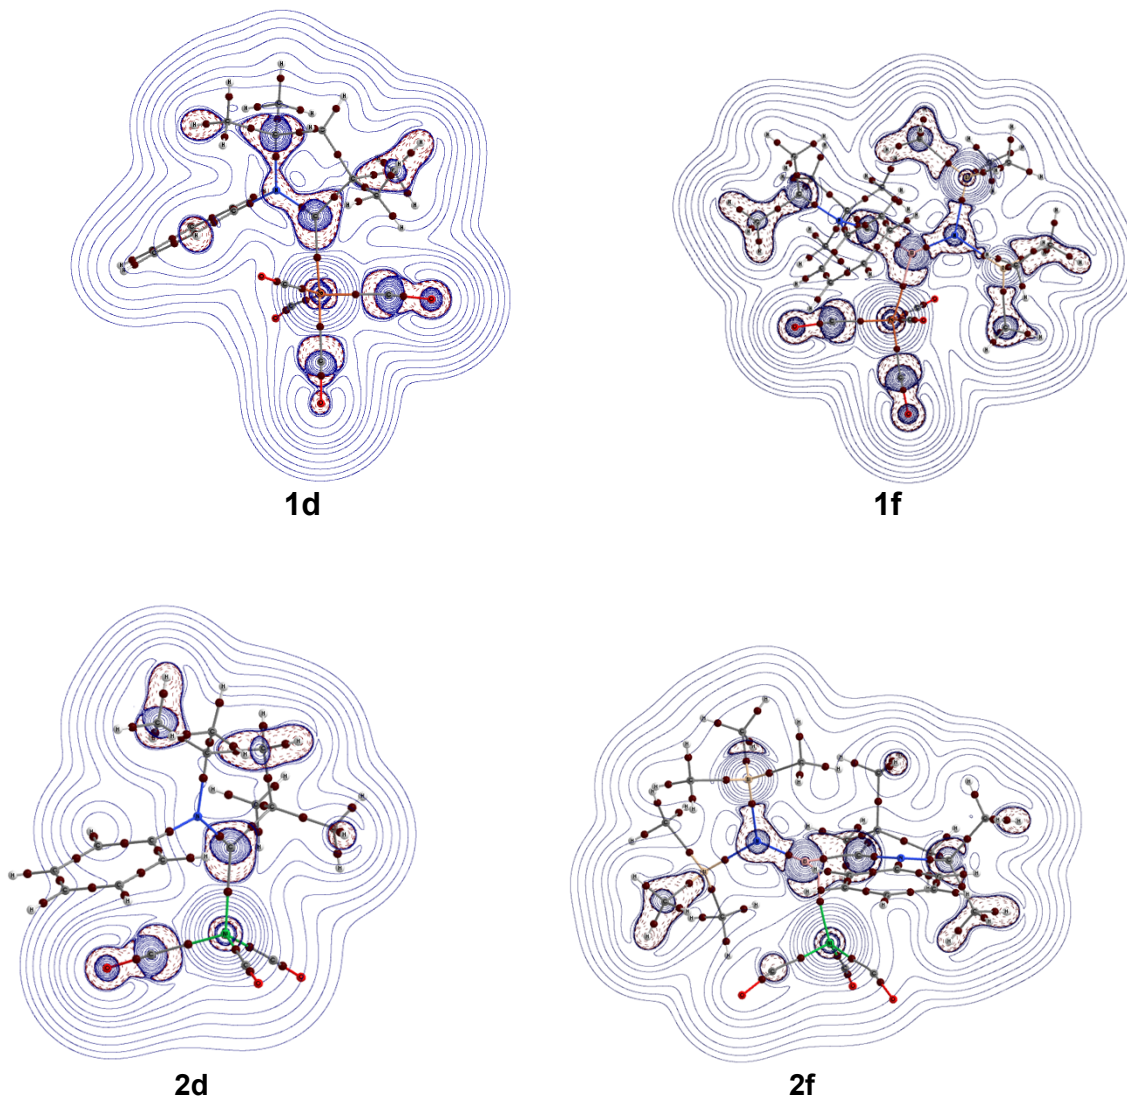

**Fig. S2:** Contour plots of Laplacian of the electron density ( $\nabla^2\rho_b$ ) in the L-M-CO (M = Fe and Ni) plane showing the bonding of the ligands L (L= **d** and **f** as representative cases) to the metal complex. Regions of charge depletion ( $\nabla^2\rho_b > 0$ ) are denoted by solid blue lines while regions of charge concentration ( $\nabla^2\rho_b < 0$ ) are denoted by dashed red lines. Brown spheres denote bond critical points (BCPs).

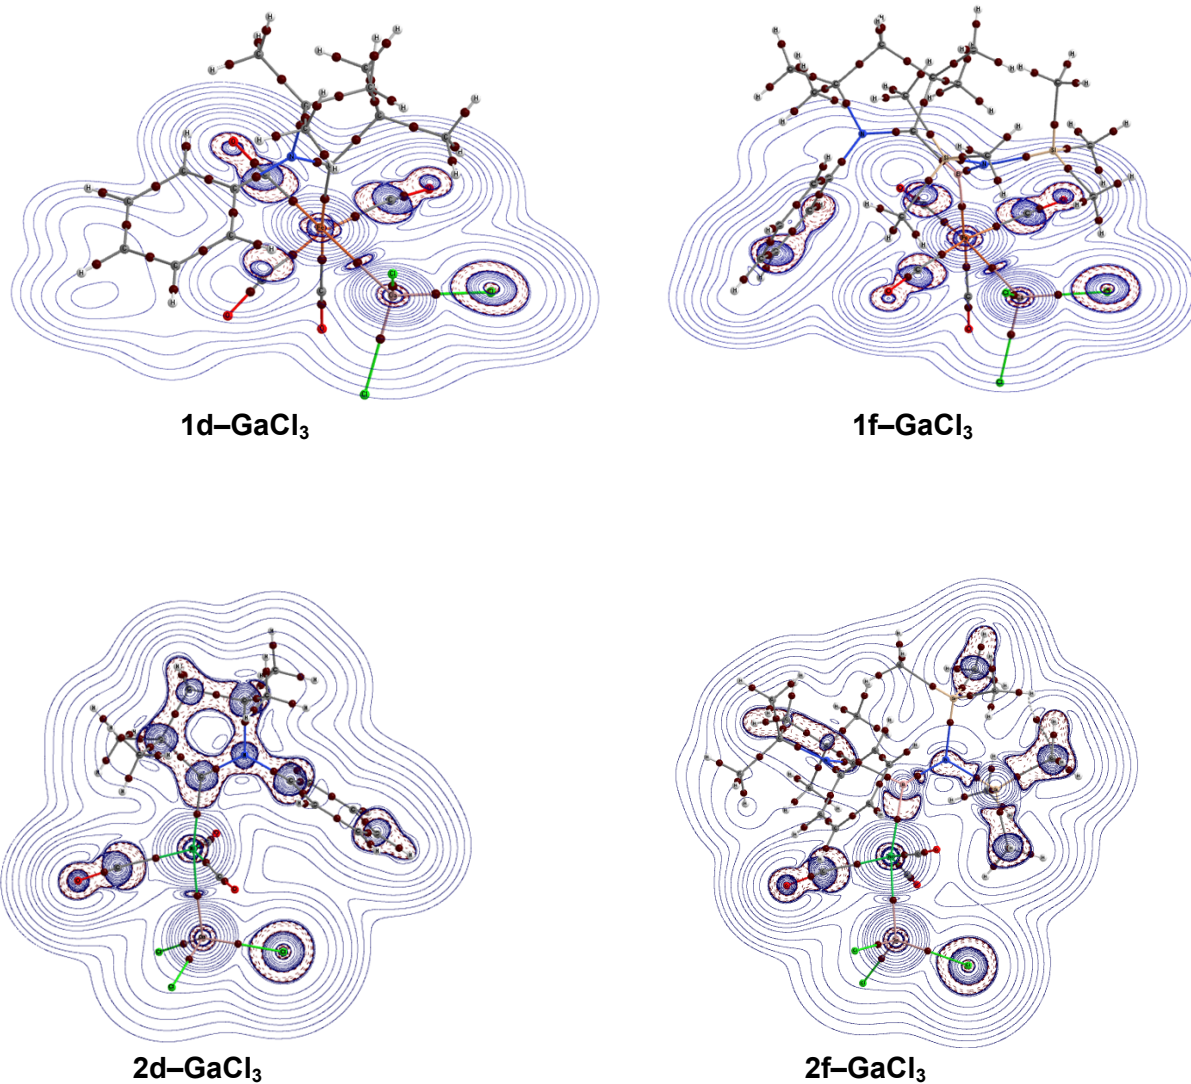

**Fig. S3:** Contour plots of Laplacian of the electron density ( $\nabla^2\rho_b$ ) in the M–Ga–Cl (M = Fe and Ni) plane showing the bonding of the  $\text{Fe}(\text{CO})_4\text{L}$  and  $\text{Ni}(\text{CO})_3\text{L}$  (L= **d** and **f** as representative cases) complexes respectively to  $\text{GaCl}_3$ . Regions of charge depletion ( $\nabla^2\rho_b > 0$ ) are denoted by solid blue lines while regions of charge concentration ( $\nabla^2\rho_b < 0$ ) are denoted by dashed red lines. Brown spheres denote bond critical points (BCPs).

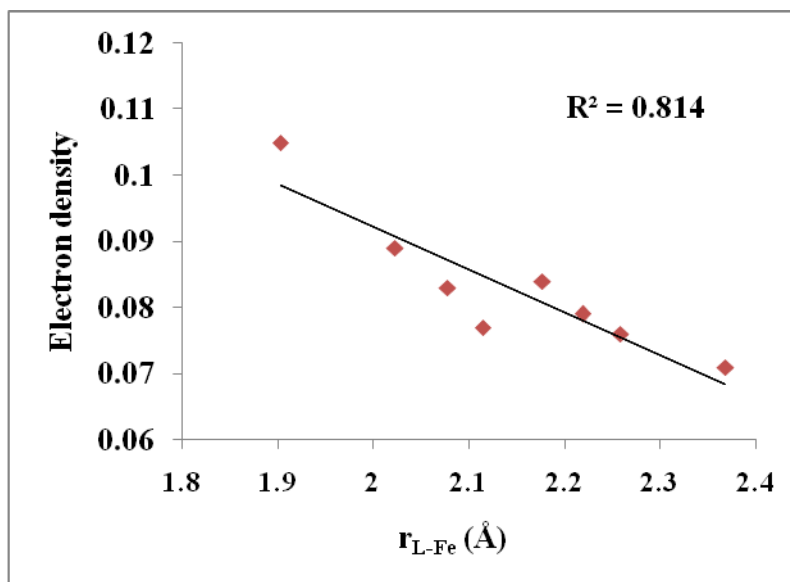

**Fig. S4:** Correlation plot between the L–Fe (L = **a-i**) bond distances and electron density at the bond critical point of the L–Fe bonds of  $\text{Fe}(\text{CO})_4\text{L}$  (Omitting the point corresponding to L = **1c**).

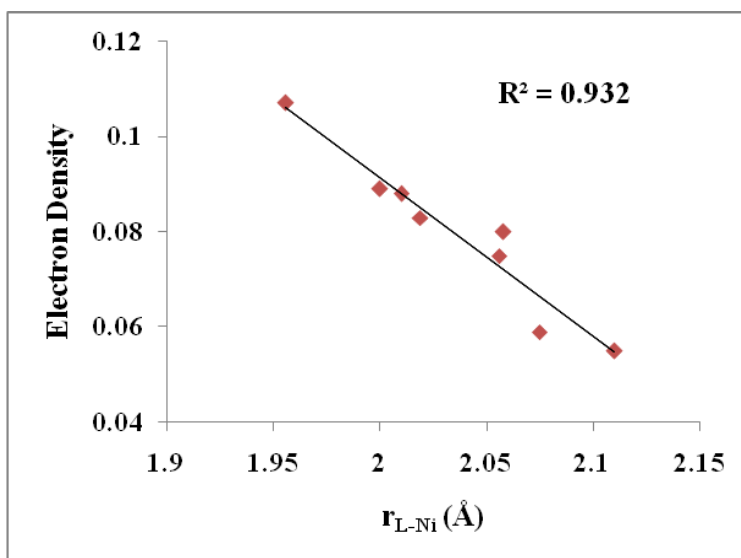

**Fig. S5:** Correlation plot between the L–Ni (L = **a-i**) bond distances and electron density at the bond critical point of the L–Ni bonds of  $\text{Ni}(\text{CO})_3\text{L}$  (Omitting the point corresponding to L = **1b**).

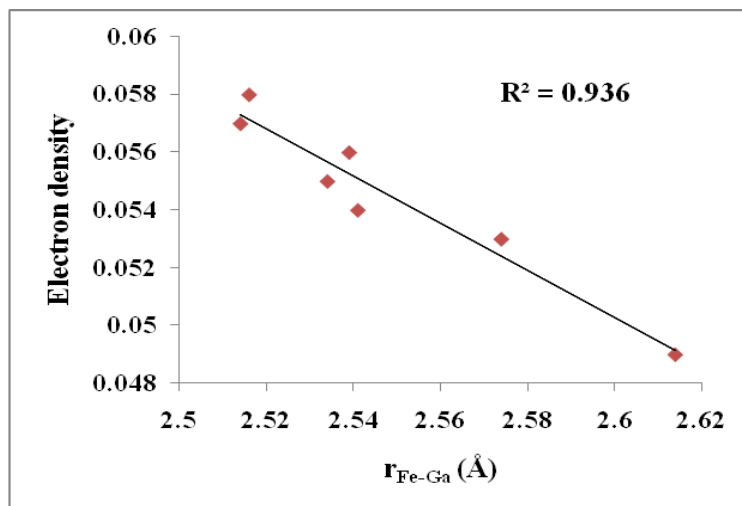

**Fig. S6:** Correlation plot between the Fe–Ga bond distances and electron density at the bond critical point of the Fe–Ga bond for the Fe MOLPs (Omitting the points corresponding to **1c**–GaCl<sub>3</sub> and **1d**–GaCl<sub>3</sub>).

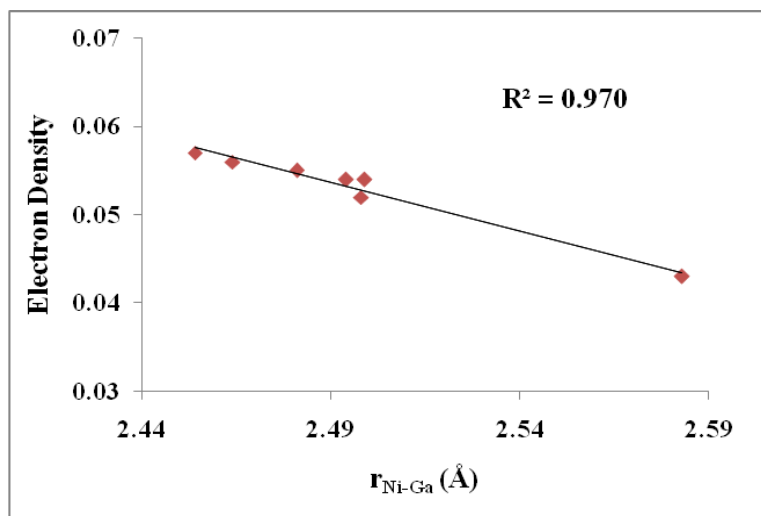

**Fig. S7:** Correlation plot between the Ni–Ga bond distances and electron density at the bond critical point of the Ni–Ga bond for the Ni MOLPs (Omitting the point corresponding to **1d**–GaCl<sub>3</sub>).

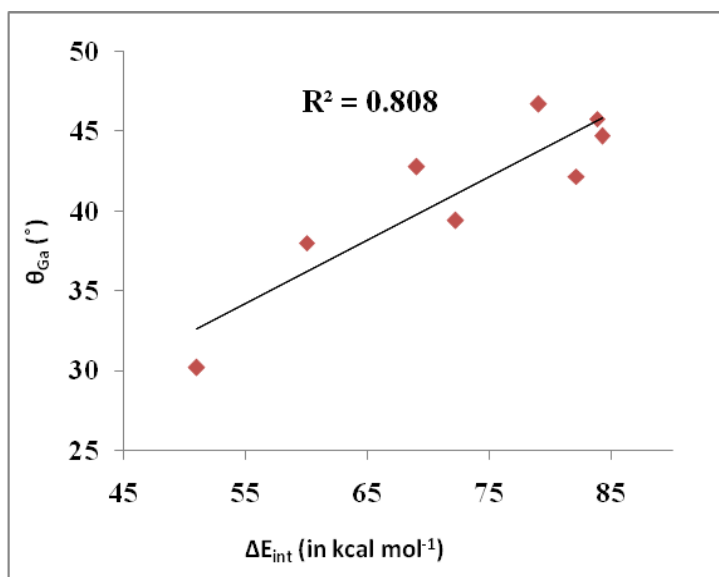

**Fig. S8:** Correlation plot between the calculated interaction energy ( $\Delta E_{\text{int}}$ ) values and the gallium pyramidalization at Ga center ( $\theta_{\text{Ga}}$ ) of the Fe–Ga bond for the Fe MOLPs (Omitting the point corresponding to **1e**–GaCl<sub>3</sub>).

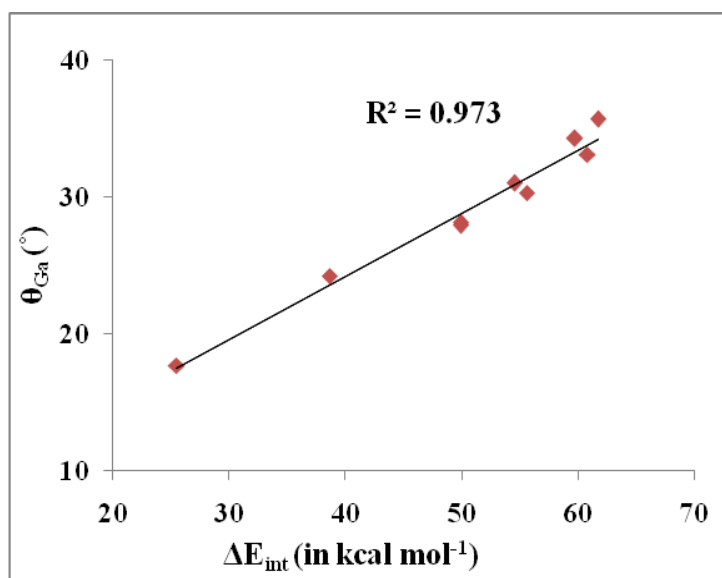

**Fig. S9:** Correlation plot between the calculated interaction energy ( $\Delta E_{\text{int}}$ ) values and the gallium pyramidalization at Ga center ( $\theta_{\text{Ga}}$ ) of the Ni–Ga bond for the Ni MOLPs.

Cartesian coordinates of the optimized geometries of the free ligands L (L=**a-i**) considered in this study are given along with their total energies (TE) and Gibbs free enthalpies (H) in hartrees including zero point vibrational correction.

**a** (TE = -113.300301, H=-113.296996)

|   |             |             |              |
|---|-------------|-------------|--------------|
| 6 | 0.000000000 | 0.000000000 | -0.641163000 |
| 8 | 0.000000000 | 0.000000000 | 0.480872000  |

**b** (TE = -460.927074, H = -460.919573)

|    |              |              |              |
|----|--------------|--------------|--------------|
| 15 | 0.000000000  | 0.000000000  | 0.608972000  |
| 6  | 0.000000000  | 1.620474000  | -0.280669000 |
| 1  | 0.000000000  | 1.494671000  | -1.367441000 |
| 1  | -0.880514000 | 2.201407000  | 0.003298000  |
| 1  | 0.880514000  | 2.201407000  | 0.003298000  |
| 6  | -1.403371000 | -0.810237000 | -0.280669000 |
| 1  | -1.294423000 | -0.747336000 | -1.367441000 |
| 1  | -1.466217000 | -1.863251000 | 0.003298000  |
| 1  | -2.346732000 | -0.338156000 | 0.003298000  |
| 6  | 1.403371000  | -0.810237000 | -0.280669000 |
| 1  | 2.346732000  | -0.338156000 | 0.003298000  |
| 1  | 1.466217000  | -1.863251000 | 0.003298000  |
| 1  | 1.294423000  | -0.747336000 | -1.367441000 |

**c** (TE = -304.624940, H = -304.617031)

|   |              |              |              |
|---|--------------|--------------|--------------|
| 6 | -0.000119000 | 0.983982000  | 0.000000000  |
| 7 | -0.000018000 | 0.129104000  | 1.058362000  |
| 7 | -0.000018000 | 0.129104000  | -1.058362000 |
| 6 | 0.000083000  | -1.200115000 | 0.675954000  |
| 1 | 0.000150000  | -2.012593000 | 1.385190000  |
| 6 | 0.000083000  | -1.200115000 | -0.675954000 |
| 1 | 0.000150000  | -2.012593000 | -1.385190000 |
| 6 | -0.000018000 | 0.556657000  | -2.445419000 |
| 1 | 0.889854000  | 0.187280000  | -2.957886000 |
| 1 | -0.889668000 | 0.186896000  | -2.957991000 |
| 1 | -0.000250000 | 1.643493000  | -2.465200000 |
| 6 | -0.000018000 | 0.556657000  | 2.445419000  |
| 1 | -0.889668000 | 0.186896000  | 2.957991000  |
| 1 | 0.889854000  | 0.187280000  | 2.957886000  |
| 1 | -0.000250000 | 1.643493000  | 2.465200000  |

**d** (TE = -599.211189, H = -599.195828)

|   |              |              |              |
|---|--------------|--------------|--------------|
| 6 | 2.291320000  | 0.845463000  | 0.297965000  |
| 6 | 0.818102000  | 1.209199000  | 0.057664000  |
| 6 | 0.980478000  | -1.217068000 | 0.052533000  |
| 6 | 2.404417000  | -0.677182000 | 0.038960000  |
| 1 | 2.954589000  | 1.429699000  | -0.344900000 |
| 1 | 2.559213000  | 1.069772000  | 1.334433000  |
| 7 | 0.196702000  | -0.171732000 | 0.061326000  |
| 6 | -1.236690000 | -0.294857000 | 0.023383000  |
| 6 | -1.894508000 | -0.343101000 | -1.200967000 |
| 6 | -1.953970000 | -0.361345000 | 1.213040000  |
| 6 | -3.281052000 | -0.453864000 | -1.233146000 |
| 1 | -1.315782000 | -0.313881000 | -2.117736000 |
| 6 | -3.339668000 | -0.472999000 | 1.175741000  |
| 1 | -1.421241000 | -0.343474000 | 2.157293000  |
| 6 | -4.005099000 | -0.513636000 | -0.046239000 |
| 1 | -3.793867000 | -0.501069000 | -2.187258000 |
| 1 | -3.898598000 | -0.534708000 | 2.102729000  |
| 1 | -5.085297000 | -0.602784000 | -0.073332000 |
| 6 | 3.239688000  | -1.378563000 | 1.109850000  |
| 1 | 3.292655000  | -2.452590000 | 0.917840000  |
| 1 | 4.259188000  | -0.979738000 | 1.124173000  |
| 1 | 2.808352000  | -1.237946000 | 2.105002000  |
| 6 | 2.992199000  | -0.985253000 | -1.345044000 |
| 1 | 4.027044000  | -0.633907000 | -1.400591000 |
| 1 | 2.983517000  | -2.060099000 | -1.538939000 |
| 1 | 2.428083000  | -0.498791000 | -2.145053000 |
| 6 | 0.576803000  | 1.878901000  | -1.294239000 |
| 1 | -0.487167000 | 2.056441000  | -1.468383000 |
| 1 | 1.082080000  | 2.847650000  | -1.318341000 |
| 1 | 0.965585000  | 1.272908000  | -2.115292000 |
| 6 | 0.235982000  | 2.065733000  | 1.176876000  |
| 1 | -0.819521000 | 2.293325000  | 1.010467000  |
| 1 | 0.337470000  | 1.569278000  | 2.144932000  |
| 1 | 0.778771000  | 3.013486000  | 1.225409000  |

**e** (TE = -556.610951, H = -556.598626)

|   |             |              |              |
|---|-------------|--------------|--------------|
| 6 | 2.880251000 | -0.025844000 | -0.253756000 |
| 6 | 1.176398000 | -1.393325000 | -0.999516000 |
| 6 | 1.592063000 | 0.511311000  | 0.366486000  |
| 1 | 3.669890000 | -0.216852000 | 0.472078000  |
| 1 | 3.258413000 | 0.623158000  | -1.047622000 |



|   |              |              |              |
|---|--------------|--------------|--------------|
| 8 | 2.499662000  | -1.285103000 | -0.857919000 |
| 7 | 0.626813000  | -0.328270000 | -0.411879000 |
| 6 | 1.414802000  | 2.003994000  | 0.130309000  |
| 1 | 0.480936000  | 2.368627000  | 0.563170000  |
| 1 | 2.233883000  | 2.548814000  | 0.607462000  |
| 1 | 1.425854000  | 2.239645000  | -0.935932000 |
| 6 | 1.475409000  | 0.167215000  | 1.849868000  |
| 1 | 2.206658000  | 0.738024000  | 2.427948000  |
| 1 | 0.480875000  | 0.410505000  | 2.230941000  |
| 1 | 1.657724000  | -0.897306000 | 2.017937000  |
| 6 | -0.786915000 | -0.198067000 | -0.250493000 |
| 6 | -1.462165000 | 0.873403000  | -0.829786000 |
| 6 | -1.484953000 | -1.146940000 | 0.492460000  |
| 6 | -2.836328000 | 0.999348000  | -0.654316000 |
| 1 | -0.915319000 | 1.589282000  | -1.432258000 |
| 6 | -2.860086000 | -1.021759000 | 0.656629000  |
| 1 | -0.943183000 | -1.981343000 | 0.923636000  |
| 6 | -3.536575000 | 0.054169000  | 0.089352000  |
| 1 | -3.361136000 | 1.830467000  | -1.111663000 |
| 1 | -3.402440000 | -1.766596000 | 1.227988000  |
| 1 | -4.608548000 | 0.151251000  | 0.219395000  |

$f(\text{TE} = -1497.127421, \text{H} = -1497.094361)$

|   |              |              |              |
|---|--------------|--------------|--------------|
| 6 | 3.148767000  | -1.122182000 | 0.405437000  |
| 6 | 0.834690000  | -0.923922000 | -0.194119000 |
| 6 | 1.169711000  | -2.395950000 | -0.379448000 |
| 6 | 2.431278000  | -2.491965000 | 0.490072000  |
| 1 | 2.122799000  | -2.674390000 | 1.523636000  |
| 1 | 3.095644000  | -3.307888000 | 0.190623000  |
| 7 | 2.082157000  | -0.229817000 | -0.150035000 |
| 6 | 4.361885000  | -1.230821000 | -0.526720000 |
| 1 | 4.837283000  | -0.273905000 | -0.737596000 |
| 1 | 5.113808000  | -1.878729000 | -0.067242000 |
| 1 | 4.079470000  | -1.674074000 | -1.482614000 |
| 6 | 3.564467000  | -0.713770000 | 1.825844000  |
| 1 | 4.106284000  | -1.541617000 | 2.292251000  |
| 1 | 4.209822000  | 0.162385000  | 1.870565000  |
| 1 | 2.674166000  | -0.513141000 | 2.428441000  |
| 6 | 0.078353000  | -3.344661000 | 0.105873000  |
| 1 | -0.849834000 | -3.203588000 | -0.459220000 |
| 1 | 0.385231000  | -4.386380000 | -0.029306000 |
| 1 | -0.142179000 | -3.188319000 | 1.164515000  |
| 6 | 1.468008000  | -2.686441000 | -1.859038000 |
| 1 | 1.970014000  | -3.652527000 | -1.980794000 |

|    |              |              |              |
|----|--------------|--------------|--------------|
| 1  | 0.538138000  | -2.716201000 | -2.432749000 |
| 1  | 2.097439000  | -1.912424000 | -2.301340000 |
| 6  | 2.169528000  | 1.145311000  | -0.217751000 |
| 6  | 1.037652000  | 1.931118000  | -0.532469000 |
| 6  | 3.372265000  | 1.855580000  | 0.009718000  |
| 6  | 1.106434000  | 3.317364000  | -0.609128000 |
| 1  | 0.091284000  | 1.463741000  | -0.763080000 |
| 6  | 3.423589000  | 3.238641000  | -0.065872000 |
| 1  | 4.285411000  | 1.333638000  | 0.243102000  |
| 6  | 2.294248000  | 3.995138000  | -0.370930000 |
| 1  | 0.206081000  | 3.870398000  | -0.858023000 |
| 1  | 4.372465000  | 3.732048000  | 0.118918000  |
| 1  | 2.342744000  | 5.076245000  | -0.423604000 |
| 5  | -0.493966000 | -0.497742000 | -0.028075000 |
| 7  | -1.828679000 | -0.189474000 | 0.068453000  |
| 14 | -2.779910000 | 0.111352000  | -1.416343000 |
| 14 | -2.411732000 | 0.159119000  | 1.727761000  |
| 6  | -4.236955000 | -1.065167000 | -1.482188000 |
| 1  | -4.612505000 | -1.131545000 | -2.508624000 |
| 1  | -3.943152000 | -2.075071000 | -1.180097000 |
| 1  | -5.074114000 | -0.757253000 | -0.852490000 |
| 6  | -3.358258000 | 1.893888000  | -1.410527000 |
| 1  | -3.977114000 | 2.146055000  | -0.545257000 |
| 1  | -2.511220000 | 2.586513000  | -1.425479000 |
| 1  | -3.958092000 | 2.099667000  | -2.303214000 |
| 6  | -4.278951000 | 0.018252000  | 1.783214000  |
| 1  | -4.798304000 | 0.719515000  | 1.125734000  |
| 1  | -4.616903000 | -0.992363000 | 1.538526000  |
| 1  | -4.617382000 | 0.232096000  | 2.802777000  |
| 6  | -1.854489000 | 1.890520000  | 2.156089000  |
| 1  | -2.212440000 | 2.201250000  | 3.142524000  |
| 1  | -0.761869000 | 1.954631000  | 2.164342000  |
| 1  | -2.216590000 | 2.621986000  | 1.427033000  |
| 6  | -1.683673000 | -1.089728000 | 2.910853000  |
| 1  | -0.591335000 | -1.057950000 | 2.922223000  |
| 1  | -2.031813000 | -0.887500000 | 3.929209000  |
| 1  | -1.990993000 | -2.108221000 | 2.656837000  |
| 6  | -1.688246000 | -0.194816000 | -2.898963000 |
| 1  | -1.386816000 | -1.243227000 | -2.971144000 |
| 1  | -2.243023000 | 0.048286000  | -3.811722000 |
| 1  | -0.775738000 | 0.406696000  | -2.895741000 |

**g** (TE = -1548.527581, H = -1548.489728)

|   |              |              |              |
|---|--------------|--------------|--------------|
| 6 | -4.061588000 | -0.338551000 | -0.515361000 |
|---|--------------|--------------|--------------|

|    |              |              |              |
|----|--------------|--------------|--------------|
| 6  | -1.739073000 | -0.878137000 | -0.229714000 |
| 6  | -2.430492000 | -2.224483000 | -0.401816000 |
| 6  | -3.806313000 | -1.798964000 | -0.962805000 |
| 1  | -3.778363000 | -1.842752000 | -2.055097000 |
| 1  | -4.604393000 | -2.466965000 | -0.627390000 |
| 7  | -2.747331000 | 0.041882000  | 0.059317000  |
| 6  | -5.141490000 | -0.218796000 | 0.559498000  |
| 1  | -5.206417000 | 0.810248000  | 0.925159000  |
| 1  | -6.121090000 | -0.491816000 | 0.157135000  |
| 1  | -4.924070000 | -0.869544000 | 1.409143000  |
| 6  | -4.443165000 | 0.526559000  | -1.719403000 |
| 1  | -5.366626000 | 0.148995000  | -2.167991000 |
| 1  | -4.611781000 | 1.567677000  | -1.432711000 |
| 1  | -3.661539000 | 0.496479000  | -2.483011000 |
| 6  | -1.689576000 | -3.167114000 | -1.344133000 |
| 1  | -0.700376000 | -3.420330000 | -0.949012000 |
| 1  | -2.243394000 | -4.102993000 | -1.468594000 |
| 1  | -1.551393000 | -2.714436000 | -2.328564000 |
| 6  | -2.586418000 | -2.887947000 | 0.975483000  |
| 1  | -3.219125000 | -3.778639000 | 0.903125000  |
| 1  | -1.615154000 | -3.194930000 | 1.372385000  |
| 1  | -3.040642000 | -2.203771000 | 1.696113000  |
| 6  | -2.390820000 | 1.391226000  | 0.338534000  |
| 6  | -1.948443000 | 2.247531000  | -0.672462000 |
| 6  | -2.403796000 | 1.839279000  | 1.658458000  |
| 6  | -1.537172000 | 3.539779000  | -0.365591000 |
| 1  | -1.910214000 | 1.884964000  | -1.693322000 |
| 6  | -1.987838000 | 3.131672000  | 1.966078000  |
| 1  | -2.728670000 | 1.155662000  | 2.436159000  |
| 6  | -1.554578000 | 3.983440000  | 0.954335000  |
| 1  | -1.194051000 | 4.198228000  | -1.156559000 |
| 1  | -1.997698000 | 3.470732000  | 2.996212000  |
| 1  | -1.228207000 | 4.989492000  | 1.194254000  |
| 5  | -0.341429000 | -0.632106000 | -0.268045000 |
| 15 | 1.238461000  | 0.142399000  | -0.018051000 |
| 7  | 2.220778000  | -0.490613000 | 1.255071000  |
| 7  | 2.274767000  | 0.266251000  | -1.347519000 |
| 6  | 1.678094000  | -1.409450000 | 2.271080000  |
| 1  | 2.464856000  | -1.487501000 | 3.025830000  |
| 6  | 3.245891000  | 0.471329000  | 1.714072000  |
| 1  | 3.540351000  | 1.019834000  | 0.813089000  |
| 6  | 2.347749000  | 1.571981000  | -2.028255000 |
| 1  | 1.913743000  | 2.295107000  | -1.331291000 |
| 6  | 2.886646000  | -0.883744000 | -2.041665000 |
| 1  | 3.156581000  | -0.522458000 | -3.037933000 |
| 6  | 4.504532000  | -0.230816000 | 2.225780000  |

|   |              |              |              |
|---|--------------|--------------|--------------|
| 1 | 5.316181000  | 0.495357000  | 2.320806000  |
| 1 | 4.363137000  | -0.676902000 | 3.213524000  |
| 1 | 4.829323000  | -1.014021000 | 1.539004000  |
| 6 | 2.736734000  | 1.485966000  | 2.740329000  |
| 1 | 3.491394000  | 2.256484000  | 2.922196000  |
| 1 | 1.826645000  | 1.979161000  | 2.387896000  |
| 1 | 2.522013000  | 1.005767000  | 3.699307000  |
| 6 | 1.484294000  | -2.808725000 | 1.691128000  |
| 1 | 1.144730000  | -3.500380000 | 2.467356000  |
| 1 | 0.730728000  | -2.806812000 | 0.899339000  |
| 1 | 2.419706000  | -3.190546000 | 1.275686000  |
| 6 | 0.407387000  | -0.942649000 | 2.999167000  |
| 1 | 0.472410000  | 0.102812000  | 3.304286000  |
| 1 | -0.475417000 | -1.050111000 | 2.367317000  |
| 1 | 0.255572000  | -1.549049000 | 3.897694000  |
| 6 | 1.505070000  | 1.600037000  | -3.304745000 |
| 1 | 1.510402000  | 2.597938000  | -3.752277000 |
| 1 | 1.884512000  | 0.902153000  | -4.056939000 |
| 1 | 0.471319000  | 1.326523000  | -3.080547000 |
| 6 | 3.791234000  | 1.998532000  | -2.296117000 |
| 1 | 4.294164000  | 1.331264000  | -3.001683000 |
| 1 | 3.812836000  | 3.002987000  | -2.727207000 |
| 1 | 4.371384000  | 2.015877000  | -1.370434000 |
| 6 | 1.925091000  | -2.050474000 | -2.241328000 |
| 1 | 0.994217000  | -1.721496000 | -2.708783000 |
| 1 | 2.389308000  | -2.808246000 | -2.878743000 |
| 1 | 1.678415000  | -2.526748000 | -1.288520000 |
| 6 | 4.167286000  | -1.348786000 | -1.348434000 |
| 1 | 4.847990000  | -0.511216000 | -1.177789000 |
| 1 | 3.927077000  | -1.796138000 | -0.382452000 |
| 1 | 4.686880000  | -2.096189000 | -1.955941000 |

**h** (TE = -1454.494934, H = -1454.465087)

|   |             |              |              |
|---|-------------|--------------|--------------|
| 6 | 2.501750000 | -1.929400000 | -1.698417000 |
| 6 | 0.706856000 | -0.850805000 | -0.794409000 |
| 6 | 2.578980000 | -1.995110000 | -0.161524000 |
| 1 | 2.574800000 | -2.913717000 | -2.167763000 |
| 1 | 3.287401000 | -1.279944000 | -2.103077000 |
| 8 | 1.225743000 | -1.368734000 | -1.996328000 |
| 7 | 1.728025000 | -0.815957000 | 0.204658000  |
| 6 | 4.010954000 | -1.920402000 | 0.340963000  |
| 1 | 4.049054000 | -1.931743000 | 1.432797000  |
| 1 | 4.559701000 | -2.794349000 | -0.020492000 |
| 1 | 4.529743000 | -1.027664000 | -0.011794000 |

|    |              |              |              |
|----|--------------|--------------|--------------|
| 6  | 1.893492000  | -3.256949000 | 0.358001000  |
| 1  | 2.455077000  | -4.146779000 | 0.061300000  |
| 1  | 1.833683000  | -3.232100000 | 1.448733000  |
| 1  | 0.879831000  | -3.343582000 | -0.038273000 |
| 6  | 2.405370000  | 0.440540000  | 0.342018000  |
| 6  | 2.553249000  | 1.335616000  | -0.722096000 |
| 6  | 2.918283000  | 0.784471000  | 1.593510000  |
| 6  | 3.205524000  | 2.549229000  | -0.531914000 |
| 1  | 2.145384000  | 1.075644000  | -1.693766000 |
| 6  | 3.579710000  | 1.994314000  | 1.778129000  |
| 1  | 2.777242000  | 0.096281000  | 2.420072000  |
| 6  | 3.723874000  | 2.883644000  | 0.717200000  |
| 1  | 3.312904000  | 3.235638000  | -1.365252000 |
| 1  | 3.968726000  | 2.249455000  | 2.758115000  |
| 1  | 4.230930000  | 3.830946000  | 0.862547000  |
| 5  | -0.626871000 | -0.506731000 | -0.525712000 |
| 7  | -1.872266000 | -0.035684000 | -0.209040000 |
| 14 | -3.047743000 | -1.147955000 | 0.554875000  |
| 14 | -2.146716000 | 1.721770000  | -0.444419000 |
| 6  | -2.178894000 | -2.766224000 | 0.890211000  |
| 1  | -2.843560000 | -3.437297000 | 1.444531000  |
| 1  | -1.890475000 | -3.275499000 | -0.032965000 |
| 1  | -1.274033000 | -2.624055000 | 1.487326000  |
| 6  | -4.501126000 | -1.426291000 | -0.593383000 |
| 1  | -4.166164000 | -1.590078000 | -1.621797000 |
| 1  | -5.055444000 | -2.319418000 | -0.286990000 |
| 1  | -5.207968000 | -0.593585000 | -0.598949000 |
| 6  | -3.616492000 | -0.386475000 | 2.169389000  |
| 1  | -2.773534000 | -0.214145000 | 2.844586000  |
| 1  | -4.142022000 | 0.563320000  | 2.038667000  |
| 1  | -4.309059000 | -1.064801000 | 2.678515000  |
| 6  | -3.967567000 | 2.006180000  | -0.782502000 |
| 1  | -4.618992000 | 1.734297000  | 0.051851000  |
| 1  | -4.133741000 | 3.070803000  | -0.978830000 |
| 1  | -4.302694000 | 1.459876000  | -1.668631000 |
| 6  | -1.598481000 | 2.616638000  | 1.101263000  |
| 1  | -1.738213000 | 3.697980000  | 1.004771000  |
| 1  | -2.150650000 | 2.289676000  | 1.986669000  |
| 1  | -0.534701000 | 2.438288000  | 1.289382000  |
| 6  | -1.147100000 | 2.289098000  | -1.915782000 |
| 1  | -0.074483000 | 2.254795000  | -1.710361000 |
| 1  | -1.336831000 | 1.672263000  | -2.799002000 |
| 1  | -1.401666000 | 3.322655000  | -2.172401000 |

i (TE = -1505.908926, H = -1505.874580)

|    |              |              |              |
|----|--------------|--------------|--------------|
| 6  | -3.929462000 | -1.235734000 | -0.665326000 |
| 6  | -1.624783000 | -1.143643000 | -0.967618000 |
| 6  | -3.502244000 | -1.991862000 | -1.923751000 |
| 1  | -3.732057000 | -1.414022000 | -2.824834000 |
| 1  | -3.932421000 | -2.990485000 | -2.001647000 |
| 7  | -2.725207000 | -0.377905000 | -0.555671000 |
| 6  | -4.072388000 | -2.181608000 | 0.527667000  |
| 1  | -4.264862000 | -1.623689000 | 1.447242000  |
| 1  | -4.907780000 | -2.869417000 | 0.372498000  |
| 1  | -3.162871000 | -2.773401000 | 0.665797000  |
| 6  | -5.183144000 | -0.404347000 | -0.873526000 |
| 1  | -6.037137000 | -1.053302000 | -1.084581000 |
| 1  | -5.419801000 | 0.173235000  | 0.023566000  |
| 1  | -5.058325000 | 0.288732000  | -1.708092000 |
| 6  | -2.554530000 | 0.548857000  | 0.515109000  |
| 6  | -2.903783000 | 1.882634000  | 0.312521000  |
| 6  | -2.009873000 | 0.156272000  | 1.740832000  |
| 6  | -2.702493000 | 2.820166000  | 1.321563000  |
| 1  | -3.310048000 | 2.175677000  | -0.649381000 |
| 6  | -1.799639000 | 1.096942000  | 2.743810000  |
| 1  | -1.747307000 | -0.884016000 | 1.894702000  |
| 6  | -2.141412000 | 2.431100000  | 2.534550000  |
| 1  | -2.970177000 | 3.857718000  | 1.153572000  |
| 1  | -1.374149000 | 0.785201000  | 3.691403000  |
| 1  | -1.974030000 | 3.163978000  | 3.316032000  |
| 5  | -0.266523000 | -0.967628000 | -0.557312000 |
| 15 | 1.486097000  | -0.585481000 | -0.673661000 |
| 7  | 2.407191000  | -0.899655000 | 0.726386000  |
| 7  | 1.683903000  | 1.067994000  | -1.014017000 |
| 6  | 3.110592000  | -2.187742000 | 0.855320000  |
| 1  | 3.550956000  | -2.185045000 | 1.856477000  |
| 6  | 2.118373000  | -0.162401000 | 1.966523000  |
| 1  | 1.492586000  | 0.685194000  | 1.674224000  |
| 6  | 0.732796000  | 2.093007000  | -0.542002000 |
| 1  | 0.097459000  | 1.602349000  | 0.201195000  |
| 6  | 2.604957000  | 1.467098000  | -2.093552000 |
| 1  | 2.543898000  | 2.556549000  | -2.156797000 |
| 6  | 3.396592000  | 0.413630000  | 2.574902000  |
| 1  | 3.163265000  | 1.045464000  | 3.436813000  |
| 1  | 4.073753000  | -0.372578000 | 2.921081000  |
| 1  | 3.929835000  | 1.016214000  | 1.836521000  |
| 6  | 1.330692000  | -0.985636000 | 2.987270000  |
| 1  | 1.054470000  | -0.365760000 | 3.845025000  |
| 1  | 0.418246000  | -1.384959000 | 2.538945000  |

|   |              |              |              |
|---|--------------|--------------|--------------|
| 1 | 1.919854000  | -1.824947000 | 3.368593000  |
| 6 | 4.261247000  | -2.298845000 | -0.141126000 |
| 1 | 4.806562000  | -3.235672000 | 0.004301000  |
| 1 | 3.888853000  | -2.290116000 | -1.169671000 |
| 1 | 4.959552000  | -1.467953000 | -0.018640000 |
| 6 | 2.190286000  | -3.408654000 | 0.755966000  |
| 1 | 1.333908000  | -3.321332000 | 1.427034000  |
| 1 | 1.804602000  | -3.524070000 | -0.260709000 |
| 1 | 2.736697000  | -4.321688000 | 1.011415000  |
| 6 | -0.185354000 | 2.602240000  | -1.653445000 |
| 1 | -0.883558000 | 3.344952000  | -1.258587000 |
| 1 | 0.381649000  | 3.082555000  | -2.456689000 |
| 1 | -0.763608000 | 1.777850000  | -2.079599000 |
| 6 | 1.451136000  | 3.244414000  | 0.163963000  |
| 1 | 2.066516000  | 3.833146000  | -0.522238000 |
| 1 | 0.721272000  | 3.925206000  | 0.611124000  |
| 1 | 2.099197000  | 2.866380000  | 0.958640000  |
| 6 | 2.207279000  | 0.897442000  | -3.456684000 |
| 1 | 1.165706000  | 1.125022000  | -3.692507000 |
| 1 | 2.840449000  | 1.309840000  | -4.247757000 |
| 1 | 2.322191000  | -0.190135000 | -3.468686000 |
| 6 | 4.048674000  | 1.106910000  | -1.755541000 |
| 1 | 4.332412000  | 1.509892000  | -0.780731000 |
| 1 | 4.179639000  | 0.022618000  | -1.724487000 |
| 1 | 4.733087000  | 1.502134000  | -2.511751000 |
| 8 | -2.082457000 | -2.128930000 | -1.801097000 |

Cartesian coordinates of the optimized geometries of the Fe(CO)<sub>4</sub>L and Ni(CO)<sub>3</sub>L complexes for the ligands L (L=**a-i**) are given along with their total energies (TE) and Gibbs free enthalpies (H) in hartrees including zero point vibrational correction.

**1a** (TE = -1830.178393, H = -1830.164927)

|    |              |              |              |
|----|--------------|--------------|--------------|
| 26 | 0.000058000  | 0.002829000  | -0.004168000 |
| 6  | 1.883884000  | 0.001091000  | -0.003897000 |
| 6  | 0.000954000  | 1.743678000  | -0.592300000 |
| 6  | -0.000642000 | -1.388870000 | -1.203161000 |
| 6  | -1.883743000 | 0.002769000  | -0.004132000 |
| 6  | -0.000356000 | -0.353269000 | 1.796503000  |
| 8  | 3.011492000  | 0.000009000  | -0.001505000 |
| 8  | -0.000650000 | -0.577957000 | 2.908896000  |
| 8  | -0.001230000 | -2.257312000 | -1.933907000 |
| 8  | -3.011349000 | 0.002318000  | -0.001808000 |

8 0.001476000 2.819699000 -0.952890000

**1b** (TE = -2177.820165, H = -2177.801708)

15 0.008720000 -0.007727000 0.530555000  
6 0.062355000 1.629293000 -0.279221000  
1 0.043741000 1.533333000 -1.367360000  
1 -0.793480000 2.228081000 0.039537000  
1 0.971354000 2.159171000 0.012835000  
6 -1.439442000 -0.803116000 -0.249742000  
1 -1.351161000 -0.810084000 -1.338663000  
1 -1.532887000 -1.830948000 0.107621000  
1 -2.350438000 -0.268201000 0.026822000  
6 1.420456000 -0.887269000 -0.226243000  
1 2.356869000 -0.436185000 0.108628000  
1 1.419233000 -1.932916000 0.088356000  
1 1.376645000 -0.847180000 -1.317198000  
26 -0.017181000 0.023073000 2.845098000  
6 0.128796000 -1.781444000 2.802573000  
6 1.494715000 1.018633000 2.809696000  
6 -1.630935000 0.840631000 2.747660000  
6 -0.076573000 0.037630000 4.684689000  
8 0.225037000 -2.918172000 2.748404000  
8 -2.643644000 1.362842000 2.668361000  
8 2.448659000 1.644965000 2.771069000  
8 -0.120844000 0.045594000 5.817102000

**1c** (TE = -2021.522342, H = -2021.503736)

6 -1.149362000 0.060446000 -0.026826000  
7 -1.973269000 -1.021418000 -0.058757000  
7 -2.007182000 1.112709000 -0.008576000  
6 -3.302651000 -0.649155000 -0.087356000  
1 -4.100447000 -1.372642000 -0.116996000  
6 -3.324084000 0.700054000 -0.054686000  
1 -4.144607000 1.398015000 -0.048777000  
6 -1.627155000 2.515150000 0.073242000  
1 -1.251631000 2.869261000 -0.886386000  
1 -2.508212000 3.094007000 0.344811000  
1 -0.868109000 2.647652000 0.841620000  
6 -1.565452000 -2.420733000 -0.058681000  
1 -2.299722000 -2.996693000 0.503410000  
1 -1.510868000 -2.804255000 -1.078415000  
1 -0.592950000 -2.518435000 0.416177000



|    |             |              |              |
|----|-------------|--------------|--------------|
| 26 | 0.928923000 | 0.003543000  | 0.025196000  |
| 6  | 1.211443000 | 1.727845000  | -0.483299000 |
| 6  | 0.699213000 | -0.450772000 | 1.769994000  |
| 6  | 0.880398000 | -1.133267000 | -1.390857000 |
| 6  | 2.745877000 | -0.246707000 | 0.193902000  |
| 8  | 1.506411000 | 2.772342000  | -0.839076000 |
| 8  | 0.492486000 | -0.742003000 | 2.856222000  |
| 8  | 0.837217000 | -1.819176000 | -2.303342000 |
| 8  | 3.861180000 | -0.419315000 | 0.314720000  |

**1d** (TE = -2316.118607, H = -2316.092451)

|   |              |              |              |
|---|--------------|--------------|--------------|
| 6 | -1.033722000 | 2.978953000  | 0.383429000  |
| 6 | -2.073454000 | 1.866368000  | 0.209829000  |
| 6 | 0.117803000  | 0.894094000  | -0.100386000 |
| 6 | 0.306166000  | 2.414167000  | -0.130644000 |
| 1 | -1.324871000 | 3.889805000  | -0.143794000 |
| 1 | -0.940863000 | 3.227115000  | 1.444228000  |
| 7 | -1.170535000 | 0.672317000  | 0.008217000  |
| 6 | -1.781229000 | -0.630846000 | -0.040269000 |
| 6 | -2.318026000 | -1.081890000 | -1.240236000 |
| 6 | -1.842902000 | -1.414591000 | 1.106988000  |
| 6 | -2.925687000 | -2.332210000 | -1.292192000 |
| 1 | -2.230189000 | -0.469400000 | -2.130894000 |
| 6 | -2.444468000 | -2.665983000 | 1.046265000  |
| 1 | -1.411549000 | -1.050716000 | 2.032266000  |
| 6 | -2.988324000 | -3.124580000 | -0.151108000 |
| 1 | -3.332232000 | -2.692474000 | -2.230122000 |
| 1 | -2.482970000 | -3.284787000 | 1.935274000  |
| 1 | -3.453368000 | -4.102798000 | -0.194833000 |
| 6 | 1.459877000  | 2.919343000  | 0.736193000  |
| 1 | 2.434912000  | 2.616638000  | 0.356152000  |
| 1 | 1.436041000  | 4.013333000  | 0.757820000  |
| 1 | 1.374644000  | 2.563218000  | 1.765645000  |
| 6 | 0.545561000  | 2.812386000  | -1.597850000 |
| 1 | 0.628811000  | 3.900485000  | -1.666864000 |
| 1 | 1.465687000  | 2.381960000  | -1.992974000 |
| 1 | -0.274016000 | 2.494638000  | -2.246075000 |
| 6 | -2.990723000 | 2.071001000  | -0.994234000 |
| 1 | -3.701649000 | 1.249428000  | -1.100337000 |
| 1 | -3.567432000 | 2.987168000  | -0.847063000 |
| 1 | -2.429913000 | 2.171346000  | -1.925089000 |
| 6 | -2.909180000 | 1.666282000  | 1.470778000  |
| 1 | -3.642578000 | 0.865530000  | 1.354473000  |
| 1 | -2.273937000 | 1.438448000  | 2.330481000  |

|    |              |              |              |
|----|--------------|--------------|--------------|
| 1  | -3.451305000 | 2.590348000  | 1.686936000  |
| 26 | 1.621166000  | -0.514620000 | 0.012406000  |
| 6  | 1.319061000  | -0.331482000 | 1.780169000  |
| 6  | 0.789747000  | -1.779312000 | -1.014394000 |
| 6  | 2.824583000  | 0.473817000  | -0.933269000 |
| 8  | 1.087020000  | -0.187734000 | 2.893943000  |
| 8  | 0.393888000  | -2.618903000 | -1.676313000 |
| 8  | 3.639321000  | 1.003533000  | -1.534399000 |
| 6  | 2.956902000  | -1.725573000 | 0.386983000  |
| 8  | 3.773309000  | -2.468778000 | 0.651566000  |

**1e** (TE = -2273.516345, H = -2273.492926)

|    |              |              |              |
|----|--------------|--------------|--------------|
| 6  | 0.998403000  | -3.042790000 | 0.229429000  |
| 6  | 2.075595000  | -1.970814000 | 0.017366000  |
| 6  | -0.103976000 | -1.049714000 | -0.050171000 |
| 1  | 1.070599000  | -3.872169000 | -0.472581000 |
| 1  | 0.982602000  | -3.425643000 | 1.251665000  |
| 7  | 1.191312000  | -0.765879000 | -0.014808000 |
| 6  | 1.734614000  | 0.559174000  | -0.008852000 |
| 6  | 2.263965000  | 1.099170000  | -1.176549000 |
| 6  | 1.733750000  | 1.290108000  | 1.175205000  |
| 6  | 2.804146000  | 2.380787000  | -1.154276000 |
| 1  | 2.217644000  | 0.534283000  | -2.100421000 |
| 6  | 2.264692000  | 2.574625000  | 1.187999000  |
| 1  | 1.305981000  | 0.854997000  | 2.071598000  |
| 6  | 2.804979000  | 3.117776000  | 0.025435000  |
| 1  | 3.205826000  | 2.809213000  | -2.065236000 |
| 1  | 2.253449000  | 3.150679000  | 2.105999000  |
| 1  | 3.217483000  | 4.120186000  | 0.037002000  |
| 6  | 2.801637000  | -2.149585000 | -1.312404000 |
| 1  | 3.530866000  | -1.354922000 | -1.479233000 |
| 1  | 3.342078000  | -3.099449000 | -1.305391000 |
| 1  | 2.095121000  | -2.163531000 | -2.146064000 |
| 6  | 3.055384000  | -1.892881000 | 1.179968000  |
| 1  | 3.780374000  | -1.089611000 | 1.032606000  |
| 1  | 2.532378000  | -1.721472000 | 2.123415000  |
| 1  | 3.606893000  | -2.832923000 | 1.259746000  |
| 26 | -1.760667000 | 0.109687000  | -0.025944000 |
| 6  | -1.578078000 | 0.128905000  | 1.768465000  |
| 6  | -1.025438000 | 1.445815000  | -1.033242000 |
| 6  | -2.648574000 | -1.269765000 | -0.837433000 |
| 8  | -1.429688000 | 0.112774000  | 2.902869000  |
| 8  | -0.660340000 | 2.319386000  | -1.670000000 |
| 8  | -3.198739000 | -2.126880000 | -1.348789000 |

|   |              |              |              |
|---|--------------|--------------|--------------|
| 6 | -3.333967000 | 1.078695000  | 0.060871000  |
| 8 | -4.302904000 | 1.665698000  | 0.120721000  |
| 8 | -0.256569000 | -2.370651000 | -0.000524000 |

**1f** (TE = -3213.999584, H = -3213.957507)

|    |              |              |              |
|----|--------------|--------------|--------------|
| 6  | -3.192296000 | -1.480559000 | 0.533628000  |
| 6  | -0.972892000 | -0.613264000 | 0.782869000  |
| 6  | -1.413171000 | -1.018577000 | 2.202484000  |
| 6  | -2.636540000 | -1.914964000 | 1.903127000  |
| 1  | -2.326824000 | -2.962625000 | 1.851833000  |
| 1  | -3.393525000 | -1.833851000 | 2.685217000  |
| 7  | -1.978470000 | -0.823600000 | -0.056698000 |
| 6  | -4.382652000 | -0.526357000 | 0.638535000  |
| 1  | -4.773890000 | -0.272916000 | -0.348295000 |
| 1  | -5.186403000 | -1.022300000 | 1.188199000  |
| 1  | -4.132509000 | 0.397847000  | 1.157997000  |
| 6  | -3.582492000 | -2.678210000 | -0.329318000 |
| 1  | -4.379640000 | -3.233800000 | 0.170887000  |
| 1  | -3.955130000 | -2.362323000 | -1.306397000 |
| 1  | -2.740207000 | -3.356246000 | -0.483427000 |
| 6  | -0.305689000 | -1.762725000 | 2.952977000  |
| 1  | 0.591258000  | -1.143863000 | 3.047166000  |
| 1  | -0.646793000 | -2.001141000 | 3.963979000  |
| 1  | -0.034648000 | -2.700553000 | 2.470377000  |
| 6  | -1.845927000 | 0.169618000  | 3.079776000  |
| 1  | -2.223524000 | -0.233098000 | 4.023920000  |
| 1  | -1.017028000 | 0.837890000  | 3.305286000  |
| 1  | -2.642048000 | 0.756999000  | 2.627618000  |
| 6  | -1.904001000 | -0.494420000 | -1.450953000 |
| 6  | -1.048743000 | -1.202531000 | -2.289197000 |
| 6  | -2.668939000 | 0.557550000  | -1.953018000 |
| 6  | -0.969653000 | -0.871814000 | -3.637906000 |
| 1  | -0.452738000 | -2.008957000 | -1.883693000 |
| 6  | -2.585830000 | 0.880846000  | -3.302423000 |
| 1  | -3.297455000 | 1.137866000  | -1.289723000 |
| 6  | -1.741112000 | 0.166550000  | -4.146700000 |
| 1  | -0.301409000 | -1.425658000 | -4.287776000 |
| 1  | -3.171187000 | 1.707161000  | -3.689033000 |
| 1  | -1.674237000 | 0.429165000  | -5.196250000 |
| 5  | 0.393243000  | 0.008451000  | 0.376068000  |
| 7  | 1.599404000  | -0.661274000 | 0.049656000  |
| 26 | -0.028792000 | 2.084915000  | 0.524941000  |
| 6  | 0.283596000  | 1.932824000  | -1.218382000 |
| 6  | 0.959383000  | 1.739555000  | 1.952774000  |

|    |              |              |              |
|----|--------------|--------------|--------------|
| 6  | -1.776670000 | 2.306580000  | 0.762601000  |
| 8  | 0.509487000  | 1.851808000  | -2.341974000 |
| 8  | 1.610887000  | 1.481683000  | 2.870273000  |
| 8  | -2.890112000 | 2.574057000  | 0.864509000  |
| 14 | 3.098219000  | 0.187211000  | -0.528870000 |
| 14 | 1.828100000  | -2.443233000 | 0.155327000  |
| 6  | 3.185267000  | -0.047612000 | -2.397259000 |
| 1  | 3.905903000  | -0.814266000 | -2.691680000 |
| 1  | 2.212240000  | -0.319556000 | -2.813259000 |
| 1  | 3.489024000  | 0.886938000  | -2.877831000 |
| 6  | 3.379608000  | 2.009735000  | -0.188085000 |
| 1  | 2.761083000  | 2.686855000  | -0.773838000 |
| 1  | 3.301938000  | 2.288080000  | 0.863268000  |
| 1  | 4.422116000  | 2.180792000  | -0.488585000 |
| 6  | 4.585675000  | -0.585236000 | 0.335333000  |
| 1  | 5.487379000  | -0.168936000 | -0.127708000 |
| 1  | 4.605376000  | -0.278698000 | 1.386213000  |
| 1  | 4.689355000  | -1.668900000 | 0.307685000  |
| 6  | 2.729405000  | -2.858424000 | 1.760105000  |
| 1  | 2.124896000  | -3.489698000 | 2.416120000  |
| 1  | 3.653440000  | -3.407942000 | 1.555215000  |
| 1  | 3.000628000  | -1.963699000 | 2.324684000  |
| 6  | 2.821201000  | -3.082246000 | -1.310439000 |
| 1  | 2.850801000  | -4.174920000 | -1.222219000 |
| 1  | 2.327786000  | -2.854717000 | -2.260171000 |
| 1  | 3.853978000  | -2.741814000 | -1.382005000 |
| 6  | 0.262782000  | -3.495694000 | 0.038760000  |
| 1  | -0.666357000 | -3.056791000 | 0.389141000  |
| 1  | 0.102756000  | -3.838629000 | -0.987025000 |
| 1  | 0.437164000  | -4.397296000 | 0.637254000  |
| 6  | 0.433266000  | 3.812950000  | 0.558571000  |
| 8  | 0.767780000  | 4.903768000  | 0.584668000  |

**1g (TE = -3265.403971, H =-3265.403971 )**

|   |              |              |             |
|---|--------------|--------------|-------------|
| 6 | -3.705571000 | 0.168436000  | 1.635547000 |
| 6 | -1.416335000 | 0.384372000  | 0.974044000 |
| 6 | -1.516469000 | 1.009858000  | 2.393685000 |
| 6 | -2.877164000 | 0.488147000  | 2.877918000 |
| 1 | -2.732110000 | -0.433167000 | 3.450254000 |
| 1 | -3.383320000 | 1.208414000  | 3.523423000 |
| 7 | -2.598197000 | -0.106873000 | 0.636570000 |
| 6 | -4.554505000 | 1.321142000  | 1.100855000 |
| 1 | -5.067301000 | 1.020344000  | 0.183454000 |
| 1 | -5.316237000 | 1.588073000  | 1.837128000 |

|    |              |              |              |
|----|--------------|--------------|--------------|
| 1  | -3.962842000 | 2.206468000  | 0.874637000  |
| 6  | -4.612547000 | -1.023773000 | 1.926512000  |
| 1  | -5.218913000 | -0.759492000 | 2.797157000  |
| 1  | -5.297736000 | -1.248748000 | 1.109378000  |
| 1  | -4.040298000 | -1.916929000 | 2.186521000  |
| 6  | -0.399036000 | 0.559401000  | 3.338238000  |
| 1  | 0.562829000  | 0.998864000  | 3.069966000  |
| 1  | -0.654329000 | 0.895638000  | 4.347506000  |
| 1  | -0.279270000 | -0.524292000 | 3.357734000  |
| 6  | -1.523728000 | 2.549470000  | 2.392964000  |
| 1  | -1.669664000 | 2.874601000  | 3.426865000  |
| 1  | -0.584707000 | 2.966473000  | 2.038635000  |
| 1  | -2.329703000 | 2.974419000  | 1.798968000  |
| 6  | -2.936137000 | -0.658510000 | -0.652200000 |
| 6  | -3.575258000 | -1.896847000 | -0.743064000 |
| 6  | -2.656495000 | 0.059173000  | -1.812009000 |
| 6  | -3.948502000 | -2.395287000 | -1.985332000 |
| 1  | -3.750144000 | -2.493678000 | 0.138967000  |
| 6  | -3.012368000 | -0.458235000 | -3.053581000 |
| 1  | -2.155328000 | 1.013820000  | -1.753418000 |
| 6  | -3.669877000 | -1.679180000 | -3.144900000 |
| 1  | -4.437191000 | -3.361195000 | -2.043529000 |
| 1  | -2.778209000 | 0.107836000  | -3.947766000 |
| 1  | -3.953293000 | -2.076005000 | -4.112992000 |
| 5  | -0.078621000 | 0.464556000  | 0.177077000  |
| 15 | 1.239989000  | -0.838816000 | 0.716121000  |
| 26 | 0.353343000  | 2.295414000  | -0.798402000 |
| 6  | 0.948011000  | 3.748541000  | -1.697349000 |
| 8  | 1.340705000  | 4.653360000  | -2.265953000 |
| 7  | 0.920351000  | -2.360544000 | 0.010403000  |
| 7  | 2.837265000  | -0.322947000 | 0.368290000  |
| 6  | 3.515383000  | -0.570550000 | -0.916159000 |
| 6  | 4.648775000  | -1.598065000 | -0.820762000 |
| 6  | 4.013173000  | 0.681217000  | -1.658891000 |
| 1  | 2.751747000  | -1.005800000 | -1.557024000 |
| 1  | 4.338273000  | -2.485800000 | -0.266367000 |
| 1  | 4.956590000  | -1.905088000 | -1.824932000 |
| 1  | 5.530849000  | -1.181778000 | -0.329406000 |
| 1  | 3.319912000  | 1.514467000  | -1.545610000 |
| 1  | 4.999224000  | 1.004346000  | -1.323310000 |
| 1  | 4.094581000  | 0.453084000  | -2.725811000 |
| 6  | 3.614640000  | 0.067144000  | 1.570875000  |
| 6  | 4.682016000  | 1.128144000  | 1.304695000  |
| 6  | 4.226512000  | -1.105369000 | 2.346683000  |
| 1  | 2.885238000  | 0.531420000  | 2.239341000  |
| 1  | 4.297551000  | 1.958105000  | 0.714730000  |

|   |              |              |              |
|---|--------------|--------------|--------------|
| 1 | 5.022209000  | 1.528846000  | 2.263432000  |
| 1 | 5.558483000  | 0.715307000  | 0.800741000  |
| 1 | 3.476643000  | -1.869929000 | 2.550456000  |
| 1 | 5.056700000  | -1.572160000 | 1.814555000  |
| 1 | 4.610107000  | -0.749828000 | 3.308236000  |
| 6 | 0.816005000  | -2.617246000 | -1.442374000 |
| 6 | -0.570843000 | -3.063522000 | -1.888955000 |
| 6 | 1.873787000  | -3.613454000 | -1.922075000 |
| 1 | -1.304701000 | -2.304205000 | -1.636809000 |
| 1 | -0.585951000 | -3.198896000 | -2.973945000 |
| 1 | -0.876009000 | -4.011307000 | -1.435049000 |
| 1 | 2.875467000  | -3.316788000 | -1.613923000 |
| 1 | 1.686391000  | -4.619264000 | -1.534391000 |
| 1 | 1.857859000  | -3.680934000 | -3.013500000 |
| 6 | 0.553916000  | -3.490068000 | 0.884540000  |
| 6 | -0.828392000 | -3.292930000 | 1.511137000  |
| 6 | 1.596920000  | -3.788775000 | 1.955369000  |
| 1 | 0.501560000  | -4.368216000 | 0.235654000  |
| 1 | -1.576411000 | -3.108037000 | 0.737861000  |
| 1 | -1.133107000 | -4.170417000 | 2.089918000  |
| 1 | -0.816147000 | -2.431820000 | 2.187709000  |
| 1 | 2.592185000  | -3.882325000 | 1.514578000  |
| 1 | 1.622774000  | -2.999028000 | 2.709781000  |
| 1 | 1.356107000  | -4.725479000 | 2.465820000  |
| 1 | 0.996342000  | -1.662609000 | -1.933973000 |
| 6 | -1.300307000 | 2.959113000  | -0.695368000 |
| 6 | 0.745577000  | 1.181575000  | -2.132573000 |
| 6 | 1.437937000  | 2.570272000  | 0.588320000  |
| 8 | 0.962734000  | 0.475467000  | -3.012843000 |
| 8 | -2.355912000 | 3.414951000  | -0.695110000 |
| 8 | 2.056101000  | 2.814818000  | 1.524907000  |

**1h** (TE =-3171.391122, H = -3171.351643)

|   |              |              |              |
|---|--------------|--------------|--------------|
| 6 | -2.240910000 | -1.767759000 | -2.319631000 |
| 6 | -0.817745000 | -0.814917000 | -0.828999000 |
| 6 | -2.953560000 | -1.771900000 | -0.953171000 |
| 1 | -2.715177000 | -1.100837000 | -3.038738000 |
| 1 | -2.131292000 | -2.764186000 | -2.747514000 |
| 8 | -0.910456000 | -1.254196000 | -2.069094000 |
| 7 | -1.935141000 | -1.019512000 | -0.155588000 |
| 6 | -3.113714000 | -3.169285000 | -0.362931000 |
| 1 | -3.504905000 | -3.109582000 | 0.655480000  |
| 1 | -3.823230000 | -3.744646000 | -0.962455000 |
| 1 | -2.164737000 | -3.706590000 | -0.337614000 |

|    |              |              |              |
|----|--------------|--------------|--------------|
| 6  | -4.304719000 | -1.071931000 | -1.035812000 |
| 1  | -4.917484000 | -1.593886000 | -1.775645000 |
| 1  | -4.834937000 | -1.115025000 | -0.083511000 |
| 1  | -4.202290000 | -0.034155000 | -1.353874000 |
| 6  | -2.094521000 | -0.650862000 | 1.218117000  |
| 6  | -1.224522000 | -1.169234000 | 2.172742000  |
| 6  | -3.088436000 | 0.255756000  | 1.580637000  |
| 6  | -1.360055000 | -0.789070000 | 3.503741000  |
| 1  | -0.441530000 | -1.853295000 | 1.869252000  |
| 6  | -3.229901000 | 0.611495000  | 2.915929000  |
| 1  | -3.712314000 | 0.710812000  | 0.822284000  |
| 6  | -2.369833000 | 0.090129000  | 3.877840000  |
| 1  | -0.675127000 | -1.183698000 | 4.245438000  |
| 1  | -3.994676000 | 1.325112000  | 3.199497000  |
| 1  | -2.474722000 | 0.385302000  | 4.915539000  |
| 5  | 0.435760000  | 0.063837000  | -0.350816000 |
| 7  | 1.618039000  | -0.604748000 | 0.084647000  |
| 26 | -0.104377000 | 2.049293000  | -0.748570000 |
| 6  | -0.262312000 | 3.821248000  | -1.050957000 |
| 6  | -1.507883000 | 1.633665000  | -1.752918000 |
| 6  | -0.421573000 | 2.201038000  | 0.989461000  |
| 6  | 1.521554000  | 1.967631000  | -1.455502000 |
| 8  | -0.345046000 | 4.942816000  | -1.235570000 |
| 8  | -2.427708000 | 1.389064000  | -2.402789000 |
| 8  | 2.575010000  | 1.892173000  | -1.910816000 |
| 8  | -0.641368000 | 2.344356000  | 2.107824000  |
| 14 | 2.011880000  | -2.192146000 | -0.648499000 |
| 14 | 2.916903000  | 0.134684000  | 1.080098000  |
| 6  | 3.509907000  | -3.013395000 | 0.134321000  |
| 1  | 3.774061000  | -3.855513000 | -0.516342000 |
| 1  | 4.403500000  | -2.394548000 | 0.223519000  |
| 1  | 3.284714000  | -3.432877000 | 1.117720000  |
| 6  | 2.362076000  | -1.900257000 | -2.464024000 |
| 1  | 2.499880000  | -2.845267000 | -2.999954000 |
| 1  | 1.544317000  | -1.359542000 | -2.948330000 |
| 1  | 3.270137000  | -1.307059000 | -2.604043000 |
| 6  | 0.639013000  | -3.471382000 | -0.474838000 |
| 1  | -0.101589000 | -3.417724000 | -1.273365000 |
| 1  | 1.104611000  | -4.460333000 | -0.548899000 |
| 1  | 0.124460000  | -3.443184000 | 0.488533000  |
| 6  | 4.511215000  | 0.297211000  | 0.088579000  |
| 1  | 4.631289000  | 1.326535000  | -0.257879000 |
| 1  | 5.378895000  | 0.061141000  | 0.713969000  |
| 1  | 4.560712000  | -0.339847000 | -0.796810000 |
| 6  | 3.154679000  | -1.009496000 | 2.568030000  |
| 1  | 3.236657000  | -0.408578000 | 3.479327000  |

|   |             |              |             |
|---|-------------|--------------|-------------|
| 1 | 2.301387000 | -1.680322000 | 2.706841000 |
| 1 | 4.054049000 | -1.625505000 | 2.508783000 |
| 6 | 2.568208000 | 1.812372000  | 1.821379000 |
| 1 | 2.381103000 | 2.608620000  | 1.101911000 |
| 1 | 1.751298000 | 1.797846000  | 2.544510000 |
| 1 | 3.479434000 | 2.074304000  | 2.375071000 |

**li** (TE = -3222.794920, H = -3222.750529)

|    |              |              |              |
|----|--------------|--------------|--------------|
| 6  | 1.238630000  | -0.206822000 | 0.725326000  |
| 6  | 2.219770000  | -0.268730000 | 2.760231000  |
| 1  | 1.516159000  | 0.094281000  | 3.514707000  |
| 1  | 2.932175000  | -0.955246000 | 3.214931000  |
| 7  | 1.980168000  | 0.904392000  | 0.786309000  |
| 6  | 2.207569000  | 1.785610000  | -0.322908000 |
| 6  | 2.604599000  | 3.104033000  | -0.096983000 |
| 6  | 2.072038000  | 1.324754000  | -1.632227000 |
| 6  | 2.884449000  | 3.942328000  | -1.169449000 |
| 1  | 2.665717000  | 3.501957000  | 0.903171000  |
| 6  | 2.335431000  | 2.177985000  | -2.697597000 |
| 1  | 1.762711000  | 0.306232000  | -1.833182000 |
| 6  | 2.750868000  | 3.486275000  | -2.475604000 |
| 1  | 3.188511000  | 4.964639000  | -0.975400000 |
| 1  | 2.224227000  | 1.802944000  | -3.708738000 |
| 1  | 2.964045000  | 4.142900000  | -3.311057000 |
| 5  | 0.199080000  | -0.834999000 | -0.270796000 |
| 15 | -1.672235000 | -0.155081000 | -0.296079000 |
| 7  | -1.598321000 | 1.509593000  | -0.755647000 |
| 7  | -2.234723000 | -0.270459000 | 1.331282000  |
| 6  | -2.252767000 | 1.858054000  | -2.036228000 |
| 1  | -2.206736000 | 2.947046000  | -2.110610000 |
| 6  | -1.384303000 | 2.620171000  | 0.174245000  |
| 1  | -0.788383000 | 2.213210000  | 0.999269000  |
| 6  | -1.452739000 | -0.021777000 | 2.553243000  |
| 1  | -0.517475000 | 0.438965000  | 2.228097000  |
| 6  | -3.473681000 | -1.058414000 | 1.536605000  |
| 1  | -3.669310000 | -1.038582000 | 2.611769000  |
| 6  | -2.702778000 | 3.162417000  | 0.738370000  |
| 1  | -2.523701000 | 3.930235000  | 1.498417000  |
| 1  | -3.288964000 | 3.627682000  | -0.060073000 |
| 1  | -3.300268000 | 2.362912000  | 1.176375000  |
| 6  | -0.592757000 | 3.775145000  | -0.457971000 |
| 1  | -0.092015000 | 4.364467000  | 0.315070000  |
| 1  | 0.161014000  | 3.406113000  | -1.153330000 |
| 1  | -1.247763000 | 4.461561000  | -1.000976000 |



|    |              |              |              |
|----|--------------|--------------|--------------|
| 6  | -3.727913000 | 1.460266000  | -2.135923000 |
| 1  | -4.180468000 | 1.922626000  | -3.018498000 |
| 1  | -3.837193000 | 0.378145000  | -2.235855000 |
| 1  | -4.289703000 | 1.781370000  | -1.256216000 |
| 6  | -1.465382000 | 1.291807000  | -3.216150000 |
| 1  | -0.431271000 | 1.641115000  | -3.188088000 |
| 1  | -1.455285000 | 0.198196000  | -3.186797000 |
| 1  | -1.911486000 | 1.596095000  | -4.167718000 |
| 6  | -1.106579000 | -1.306300000 | 3.314002000  |
| 1  | -0.419572000 | -1.089862000 | 4.137846000  |
| 1  | -1.996264000 | -1.761378000 | 3.758004000  |
| 1  | -0.635084000 | -2.040108000 | 2.661127000  |
| 6  | -2.127967000 | 0.984238000  | 3.490724000  |
| 1  | -3.126366000 | 0.653328000  | 3.789851000  |
| 1  | -1.540160000 | 1.103847000  | 4.406298000  |
| 1  | -2.224917000 | 1.963134000  | 3.021348000  |
| 6  | -3.324883000 | -2.523574000 | 1.119557000  |
| 1  | -2.474648000 | -2.996175000 | 1.613613000  |
| 1  | -4.225737000 | -3.090047000 | 1.374377000  |
| 1  | -3.176606000 | -2.601925000 | 0.038814000  |
| 6  | -4.684608000 | -0.427978000 | 0.855444000  |
| 1  | -4.812963000 | 0.612930000  | 1.161793000  |
| 1  | -4.582217000 | -0.459003000 | -0.230690000 |
| 1  | -5.593508000 | -0.976243000 | 1.119708000  |
| 8  | 1.466387000  | -0.984458000 | 1.777960000  |
| 26 | 0.586029000  | -2.557954000 | -1.190165000 |
| 6  | 1.144145000  | -3.666828000 | -2.530933000 |
| 6  | 2.287200000  | -2.096157000 | -0.873028000 |
| 6  | 0.219147000  | -3.547450000 | 0.217062000  |
| 6  | -1.045038000 | -2.478688000 | -2.073494000 |
| 8  | 1.511049000  | -4.355206000 | -3.360207000 |
| 8  | 0.025705000  | -4.195790000 | 1.139056000  |
| 8  | 3.380304000  | -1.799492000 | -0.684973000 |
| 8  | -1.980549000 | -2.564635000 | -2.715393000 |
| 6  | 2.880781000  | 0.882301000  | 1.998738000  |
| 6  | 2.827067000  | 2.131983000  | 2.878680000  |
| 1  | 3.105339000  | 1.842042000  | 3.896017000  |
| 1  | 3.536033000  | 2.897594000  | 2.567748000  |
| 1  | 1.820094000  | 2.554458000  | 2.916779000  |
| 6  | 4.307439000  | 0.557725000  | 1.572279000  |
| 1  | 4.357880000  | -0.402607000 | 1.057985000  |
| 1  | 4.700595000  | 1.327924000  | 0.905724000  |
| 1  | 4.948944000  | 0.517802000  | 2.456259000  |

**2a** (TE = -1961.465971, H = -1961.452936)

|    |              |              |              |
|----|--------------|--------------|--------------|
| 28 | -0.273584000 | -0.140454000 | -0.000008000 |
| 6  | 0.363755000  | 0.740048000  | -1.560717000 |
| 6  | 0.386784000  | -1.922613000 | -0.001440000 |
| 6  | 0.362170000  | 0.740870000  | 1.560782000  |
| 6  | -2.175808000 | -0.129968000 | 0.001225000  |
| 8  | 0.755284000  | 1.241903000  | -2.492930000 |
| 8  | 0.797446000  | -2.974106000 | -0.002535000 |
| 8  | 0.750763000  | 1.245275000  | 2.492847000  |
| 8  | -3.304472000 | -0.115882000 | 0.002777000  |

**2b** (TE = -2309.099600, -2309.082043)

|    |              |              |              |
|----|--------------|--------------|--------------|
| 15 | -0.665271000 | 0.396263000  | -0.856185000 |
| 6  | -0.707118000 | 2.031503000  | -1.684517000 |
| 1  | -0.680370000 | 1.940700000  | -2.773755000 |
| 1  | -1.614239000 | 2.566781000  | -1.394977000 |
| 1  | 0.148825000  | 2.626204000  | -1.357127000 |
| 6  | -2.025254000 | -0.497225000 | -1.703068000 |
| 1  | -1.922657000 | -0.465549000 | -2.791098000 |
| 1  | -2.032433000 | -1.540300000 | -1.378136000 |
| 1  | -2.984163000 | -0.055556000 | -1.423460000 |
| 6  | 0.815786000  | -0.370139000 | -1.619608000 |
| 1  | 1.713842000  | 0.151120000  | -1.279673000 |
| 1  | 0.894391000  | -1.410644000 | -1.296427000 |
| 1  | 0.780703000  | -0.339284000 | -2.712033000 |
| 28 | -0.665918000 | 0.406822000  | 1.456925000  |
| 6  | 0.970796000  | 1.202858000  | 1.846550000  |
| 6  | -2.135960000 | 1.419079000  | 1.980514000  |
| 6  | -0.802110000 | -1.394448000 | 1.905701000  |
| 8  | -0.899782000 | -2.510116000 | 2.087745000  |
| 8  | -3.048374000 | 2.039030000  | 2.245586000  |
| 8  | 1.978383000  | 1.706203000  | 1.984541000  |

**2c** (TE = -2152.803078, H = -2152.785139)

|    |              |              |              |
|----|--------------|--------------|--------------|
| 28 | -1.003645000 | 0.000670000  | -0.004394000 |
| 6  | -1.713291000 | 1.665133000  | -0.450744000 |
| 6  | -1.555525000 | -1.278198000 | -1.247124000 |
| 6  | -1.591680000 | -0.480684000 | 1.691889000  |
| 8  | -2.183609000 | 2.669850000  | -0.698522000 |
| 8  | -1.889176000 | -2.065126000 | -1.995605000 |
| 8  | -1.938429000 | -0.779307000 | 2.731986000  |

|   |             |              |              |
|---|-------------|--------------|--------------|
| 6 | 1.061066000 | 0.038397000  | 0.010337000  |
| 6 | 3.227240000 | -0.640187000 | 0.005540000  |
| 6 | 3.227931000 | 0.712271000  | -0.011554000 |
| 7 | 1.902310000 | 1.101968000  | -0.006057000 |
| 7 | 1.900605000 | -1.026903000 | 0.024028000  |
| 6 | 1.455802000 | -2.410923000 | 0.002749000  |
| 1 | 0.544403000 | -2.502676000 | 0.590301000  |
| 1 | 1.258725000 | -2.733235000 | -1.021150000 |
| 1 | 2.229756000 | -3.042861000 | 0.436805000  |
| 6 | 1.456912000 | 2.485942000  | -0.033718000 |
| 1 | 0.989949000 | 2.713841000  | -0.992335000 |
| 1 | 0.741212000 | 2.659951000  | 0.768552000  |
| 1 | 2.319075000 | 3.135654000  | 0.108393000  |
| 1 | 4.038064000 | -1.349854000 | 0.015703000  |
| 1 | 4.039450000 | 1.421126000  | -0.016156000 |

**2d** (TE = -2447.400441, H = -2447.375049)

|   |              |              |              |
|---|--------------|--------------|--------------|
| 6 | -0.025027000 | 3.158798000  | -0.296066000 |
| 6 | 1.288602000  | 2.404453000  | -0.040356000 |
| 6 | -0.500049000 | 0.780799000  | -0.042539000 |
| 6 | -1.168777000 | 2.149364000  | -0.038780000 |
| 1 | -0.105375000 | 4.043933000  | 0.338799000  |
| 1 | -0.054858000 | 3.496136000  | -1.335591000 |
| 7 | 0.793069000  | 0.980332000  | -0.041858000 |
| 6 | 1.736645000  | -0.105268000 | -0.004585000 |
| 6 | 2.180901000  | -0.592369000 | 1.219207000  |
| 6 | 2.170094000  | -0.674872000 | -1.196707000 |
| 6 | 3.069580000  | -1.662444000 | 1.248156000  |
| 1 | 1.804538000  | -0.154934000 | 2.137854000  |
| 6 | 3.056459000  | -1.745400000 | -1.161483000 |
| 1 | 1.793848000  | -0.292602000 | -2.139371000 |
| 6 | 3.509128000  | -2.237498000 | 0.059843000  |
| 1 | 3.406986000  | -2.053819000 | 2.201086000  |
| 1 | 3.386524000  | -2.199950000 | -2.088576000 |
| 1 | 4.196321000  | -3.075596000 | 0.085159000  |
| 6 | -2.241238000 | 2.235525000  | -1.125348000 |
| 1 | -3.071444000 | 1.557025000  | -0.921748000 |
| 1 | -2.639950000 | 3.253319000  | -1.175372000 |
| 1 | -1.833287000 | 1.982922000  | -2.107933000 |
| 6 | -1.815818000 | 2.349682000  | 1.338798000  |
| 1 | -2.308463000 | 3.325413000  | 1.379171000  |
| 1 | -2.565752000 | 1.579902000  | 1.533470000  |
| 1 | -1.078615000 | 2.308398000  | 2.144635000  |
| 6 | 1.915142000  | 2.730503000  | 1.314171000  |

|    |              |              |              |
|----|--------------|--------------|--------------|
| 1  | 2.804755000  | 2.124198000  | 1.498933000  |
| 1  | 2.220662000  | 3.779556000  | 1.329016000  |
| 1  | 1.208878000  | 2.570733000  | 2.131589000  |
| 6  | 2.307416000  | 2.613348000  | -1.155126000 |
| 1  | 3.224653000  | 2.046508000  | -0.980520000 |
| 1  | 1.895454000  | 2.322670000  | -2.124430000 |
| 1  | 2.572068000  | 3.672541000  | -1.204581000 |
| 28 | -1.398487000 | -1.050649000 | -0.028924000 |
| 6  | -3.247295000 | -0.904884000 | 0.226018000  |
| 6  | -1.021289000 | -1.861993000 | -1.654800000 |
| 6  | -0.735229000 | -2.078336000 | 1.382517000  |
| 8  | -0.374464000 | -2.707761000 | 2.256946000  |
| 8  | -0.771795000 | -2.332215000 | -2.659406000 |
| 8  | -4.369522000 | -0.845892000 | 0.397930000  |

**2e** (TE = -2404.794192, H = -2404.771622)

|    |              |              |              |
|----|--------------|--------------|--------------|
| 6  | 0.729245000  | -3.150534000 | 0.193942000  |
| 6  | 1.828574000  | -2.108747000 | -0.041098000 |
| 6  | -0.320802000 | -1.117196000 | 0.021513000  |
| 1  | 0.753239000  | -3.975678000 | -0.516355000 |
| 1  | 0.736614000  | -3.540172000 | 1.214192000  |
| 7  | 0.985374000  | -0.882323000 | 0.067523000  |
| 6  | 1.534066000  | 0.438763000  | 0.028204000  |
| 6  | 1.679491000  | 1.090070000  | -1.193167000 |
| 6  | 1.893371000  | 1.068300000  | 1.215371000  |
| 6  | 2.190536000  | 2.382869000  | -1.224500000 |
| 1  | 1.369294000  | 0.589533000  | -2.104301000 |
| 6  | 2.402878000  | 2.362178000  | 1.178336000  |
| 1  | 1.748488000  | 0.551340000  | 2.157733000  |
| 6  | 2.552818000  | 3.018143000  | -0.039933000 |
| 1  | 2.293487000  | 2.897636000  | -2.172917000 |
| 1  | 2.670918000  | 2.861271000  | 2.102467000  |
| 1  | 2.943590000  | 4.029040000  | -0.065708000 |
| 6  | 2.427913000  | -2.203993000 | -1.441720000 |
| 1  | 3.111784000  | -1.373982000 | -1.632632000 |
| 1  | 2.993784000  | -3.133600000 | -1.542037000 |
| 1  | 1.644561000  | -2.193723000 | -2.203935000 |
| 6  | 2.909416000  | -2.145810000 | 1.029071000  |
| 1  | 3.650070000  | -1.359704000 | 0.866905000  |
| 1  | 2.480937000  | -2.022943000 | 2.025883000  |
| 1  | 3.428706000  | -3.106878000 | 0.995222000  |
| 28 | -1.822842000 | 0.246617000  | 0.015667000  |
| 6  | -3.400445000 | -0.779677000 | 0.033731000  |
| 6  | -1.643794000 | 1.288421000  | 1.545147000  |

|   |              |              |              |
|---|--------------|--------------|--------------|
| 6 | -1.732884000 | 1.332497000  | -1.490856000 |
| 8 | -1.680263000 | 2.013414000  | -2.399341000 |
| 8 | -1.500449000 | 1.911787000  | 2.484217000  |
| 8 | -4.303135000 | -1.466334000 | 0.040459000  |
| 8 | -0.514379000 | -2.434223000 | 0.009651000  |

**2f** (TE = -3345.289649, H = -3345.247168)

|    |              |              |              |
|----|--------------|--------------|--------------|
| 6  | 2.851008000  | -0.475743000 | 1.702107000  |
| 6  | 0.581906000  | -0.348427000 | 0.895870000  |
| 6  | 0.490570000  | -0.392254000 | 2.431582000  |
| 6  | 1.908213000  | 0.045618000  | 2.810243000  |
| 1  | 1.941313000  | 1.139041000  | 2.832683000  |
| 1  | 2.210110000  | -0.317282000 | 3.796483000  |
| 7  | 1.894104000  | -0.770289000 | 0.580775000  |
| 6  | 3.582288000  | -1.734330000 | 2.191789000  |
| 1  | 4.206394000  | -2.203858000 | 1.433690000  |
| 1  | 4.233451000  | -1.462704000 | 3.026891000  |
| 1  | 2.881843000  | -2.487781000 | 2.551260000  |
| 6  | 3.853006000  | 0.637329000  | 1.366821000  |
| 1  | 4.419154000  | 0.878287000  | 2.271263000  |
| 1  | 4.571602000  | 0.377396000  | 0.590572000  |
| 1  | 3.326628000  | 1.543353000  | 1.061631000  |
| 6  | -0.567825000 | 0.498611000  | 3.071951000  |
| 1  | -1.574587000 | 0.220961000  | 2.744064000  |
| 1  | -0.537850000 | 0.385287000  | 4.159840000  |
| 1  | -0.410836000 | 1.552314000  | 2.840895000  |
| 6  | 0.207189000  | -1.842443000 | 2.863176000  |
| 1  | 0.368576000  | -1.961383000 | 3.939513000  |
| 1  | -0.832260000 | -2.106970000 | 2.651870000  |
| 1  | 0.840567000  | -2.560767000 | 2.343553000  |
| 6  | 2.277133000  | -1.122226000 | -0.707190000 |
| 6  | 1.337564000  | -1.148643000 | -1.758413000 |
| 6  | 3.609735000  | -1.429547000 | -1.053671000 |
| 6  | 1.706281000  | -1.457603000 | -3.062067000 |
| 1  | 0.294107000  | -0.934787000 | -1.578070000 |
| 6  | 3.966179000  | -1.735800000 | -2.358742000 |
| 1  | 4.390184000  | -1.426581000 | -0.311566000 |
| 6  | 3.024662000  | -1.750982000 | -3.383678000 |
| 1  | 0.942007000  | -1.459258000 | -3.832676000 |
| 1  | 5.005613000  | -1.961244000 | -2.572882000 |
| 1  | 3.312051000  | -1.985052000 | -4.401753000 |
| 5  | -0.654597000 | -0.124271000 | 0.190366000  |
| 7  | -1.975084000 | -0.470609000 | -0.061543000 |
| 14 | -2.389278000 | -2.221700000 | -0.078412000 |

|    |              |              |              |
|----|--------------|--------------|--------------|
| 14 | -3.296425000 | 0.718808000  | -0.296164000 |
| 6  | -3.274763000 | -2.693767000 | 1.516464000  |
| 1  | -2.855635000 | -3.612189000 | 1.937993000  |
| 1  | -3.197952000 | -1.918071000 | 2.281970000  |
| 1  | -4.339551000 | -2.875385000 | 1.345977000  |
| 6  | -3.491345000 | -2.538200000 | -1.564498000 |
| 1  | -4.469289000 | -2.055125000 | -1.524034000 |
| 1  | -3.000174000 | -2.220455000 | -2.489408000 |
| 1  | -3.671620000 | -3.615375000 | -1.651709000 |
| 6  | -4.828457000 | 0.065919000  | 0.576249000  |
| 1  | -5.176354000 | -0.916777000 | 0.254428000  |
| 1  | -4.687095000 | 0.033264000  | 1.660893000  |
| 1  | -5.648952000 | 0.766864000  | 0.385240000  |
| 6  | -3.649243000 | 0.909977000  | -2.130429000 |
| 1  | -4.455950000 | 0.243563000  | -2.448263000 |
| 1  | -3.959690000 | 1.931910000  | -2.368218000 |
| 1  | -2.775200000 | 0.682366000  | -2.744376000 |
| 6  | -2.950991000 | 2.360056000  | 0.546112000  |
| 1  | -2.442068000 | 3.097909000  | -0.073626000 |
| 1  | -3.915846000 | 2.791527000  | 0.835944000  |
| 1  | -2.368191000 | 2.235866000  | 1.462717000  |
| 6  | -0.866407000 | -3.279792000 | -0.322069000 |
| 1  | -0.028143000 | -3.021423000 | 0.326374000  |
| 1  | -1.136808000 | -4.321358000 | -0.114325000 |
| 1  | -0.509464000 | -3.243530000 | -1.354112000 |
| 28 | 0.437004000  | 1.831122000  | -0.246437000 |
| 6  | 2.115884000  | 1.836671000  | -1.219365000 |
| 6  | 0.476817000  | 3.161837000  | 1.060690000  |
| 6  | -0.580229000 | 2.322097000  | -1.705310000 |
| 8  | 0.479823000  | 4.026546000  | 1.796752000  |
| 8  | 2.981758000  | 2.060192000  | -1.912309000 |
| 8  | -1.014275000 | 2.730014000  | -2.674269000 |

**2g** (TE = -3396.700124, H = -3396.653252)

|   |              |              |              |
|---|--------------|--------------|--------------|
| 6 | -3.746068000 | 1.162425000  | 0.728100000  |
| 6 | -1.507954000 | 0.278410000  | 0.839489000  |
| 6 | -2.046854000 | 0.225539000  | 2.276041000  |
| 6 | -3.564144000 | 0.398072000  | 2.052778000  |
| 1 | -4.025247000 | -0.589799000 | 1.964132000  |
| 1 | -4.044800000 | 0.915483000  | 2.886540000  |
| 7 | -2.425118000 | 0.935762000  | 0.086332000  |
| 6 | -3.996986000 | 2.660308000  | 0.918138000  |
| 1 | -4.001875000 | 3.175207000  | -0.046199000 |
| 1 | -4.973684000 | 2.818856000  | 1.382700000  |

|    |              |              |              |
|----|--------------|--------------|--------------|
| 1  | -3.240843000 | 3.126466000  | 1.551051000  |
| 6  | -4.878473000 | 0.575182000  | -0.113229000 |
| 1  | -5.818780000 | 0.644585000  | 0.440408000  |
| 1  | -5.003152000 | 1.119074000  | -1.052754000 |
| 1  | -4.698972000 | -0.476359000 | -0.340544000 |
| 6  | -1.725513000 | -1.053934000 | 3.044120000  |
| 1  | -0.645481000 | -1.212099000 | 3.114948000  |
| 1  | -2.118848000 | -0.978774000 | 4.062682000  |
| 1  | -2.164985000 | -1.933398000 | 2.572269000  |
| 6  | -1.445597000 | 1.409861000  | 3.055136000  |
| 1  | -1.959246000 | 1.522594000  | 4.014325000  |
| 1  | -0.387049000 | 1.232569000  | 3.259718000  |
| 1  | -1.527537000 | 2.354126000  | 2.513133000  |
| 6  | -2.142657000 | 1.348405000  | -1.247213000 |
| 6  | -2.474673000 | 0.538601000  | -2.331370000 |
| 6  | -1.498875000 | 2.565446000  | -1.455628000 |
| 6  | -2.152881000 | 0.949571000  | -3.621496000 |
| 1  | -2.968901000 | -0.411000000 | -2.156831000 |
| 6  | -1.174300000 | 2.971997000  | -2.744835000 |
| 1  | -1.261009000 | 3.181110000  | -0.595294000 |
| 6  | -1.499438000 | 2.160842000  | -3.828897000 |
| 1  | -2.403646000 | 0.316373000  | -4.465161000 |
| 1  | -0.668071000 | 3.918203000  | -2.903021000 |
| 1  | -1.243331000 | 2.472119000  | -4.835462000 |
| 5  | -0.199595000 | -0.260333000 | 0.430993000  |
| 15 | 1.437747000  | 0.177938000  | -0.206189000 |
| 7  | 2.236340000  | 1.556285000  | 0.521446000  |
| 7  | 2.600818000  | -1.048187000 | -0.157675000 |
| 6  | 3.236247000  | -1.526079000 | 1.089168000  |
| 1  | 3.521533000  | -2.565580000 | 0.898308000  |
| 6  | 2.279934000  | -1.529104000 | 2.277542000  |
| 1  | 1.364224000  | -2.074854000 | 2.060322000  |
| 1  | 2.766041000  | -1.999989000 | 3.135849000  |
| 1  | 2.014186000  | -0.507236000 | 2.564661000  |
| 6  | 4.498808000  | -0.748687000 | 1.483321000  |
| 1  | 5.202219000  | -0.635826000 | 0.658229000  |
| 1  | 4.226966000  | 0.244709000  | 1.843505000  |
| 1  | 5.016952000  | -1.270175000 | 2.293910000  |
| 28 | -1.047100000 | -2.208971000 | -0.229021000 |
| 6  | -2.856983000 | -2.549700000 | -0.005091000 |
| 6  | -0.516754000 | -2.090653000 | -2.017947000 |
| 6  | -0.205630000 | -3.544552000 | 0.751238000  |
| 8  | -0.177620000 | -2.004786000 | -3.098164000 |
| 8  | -3.915372000 | -2.941157000 | 0.151112000  |
| 8  | 0.245607000  | -4.380403000 | 1.375267000  |
| 6  | 3.453875000  | 1.958041000  | -0.211683000 |

|   |             |              |              |
|---|-------------|--------------|--------------|
| 6 | 4.407478000 | 2.810533000  | 0.624693000  |
| 6 | 3.233187000 | 2.591232000  | -1.595759000 |
| 1 | 3.975430000 | 1.015530000  | -0.387660000 |
| 1 | 4.607675000 | 2.358955000  | 1.597411000  |
| 1 | 5.359341000 | 2.903146000  | 0.094137000  |
| 1 | 4.033193000 | 3.822403000  | 0.788725000  |
| 1 | 2.447929000 | 2.069116000  | -2.150023000 |
| 1 | 2.967236000 | 3.647923000  | -1.538426000 |
| 1 | 4.155033000 | 2.520024000  | -2.181144000 |
| 6 | 1.387652000 | 2.559896000  | 1.182281000  |
| 6 | 1.186041000 | 3.876677000  | 0.424568000  |
| 6 | 1.838446000 | 2.829630000  | 2.621871000  |
| 1 | 0.399850000 | 2.100312000  | 1.248755000  |
| 1 | 0.900173000 | 3.700846000  | -0.612456000 |
| 1 | 0.388595000 | 4.451002000  | 0.907079000  |
| 1 | 2.078049000 | 4.505986000  | 0.430740000  |
| 1 | 1.997307000 | 1.891167000  | 3.158097000  |
| 1 | 2.766653000 | 3.402333000  | 2.661349000  |
| 1 | 1.075660000 | 3.403334000  | 3.158432000  |
| 6 | 3.012917000 | -1.684095000 | -1.426701000 |
| 6 | 2.694573000 | -3.181375000 | -1.469714000 |
| 6 | 4.486035000 | -1.467136000 | -1.781086000 |
| 1 | 2.412274000 | -1.197534000 | -2.199930000 |
| 1 | 1.673964000 | -3.380552000 | -1.142861000 |
| 1 | 2.802405000 | -3.554057000 | -2.491900000 |
| 1 | 3.374217000 | -3.766154000 | -0.843728000 |
| 1 | 4.750451000 | -0.407349000 | -1.792663000 |
| 1 | 5.147270000 | -1.985508000 | -1.081592000 |
| 1 | 4.687538000 | -1.871919000 | -2.776776000 |

**2h** (TE = -3302.666399, H = -3302.627139)

|   |             |              |              |
|---|-------------|--------------|--------------|
| 6 | 2.344352000 | -1.019961000 | -2.536445000 |
| 6 | 0.795042000 | -0.381503000 | -1.015434000 |
| 6 | 3.064044000 | -0.087974000 | -1.555920000 |
| 1 | 2.891581000 | -1.934948000 | -2.754913000 |
| 1 | 2.110293000 | -0.496811000 | -3.470073000 |
| 8 | 1.117723000 | -1.367464000 | -1.895047000 |
| 7 | 1.853933000 | 0.501385000  | -0.921552000 |
| 6 | 3.865111000 | 0.956699000  | -2.323627000 |
| 1 | 4.366301000 | 1.660994000  | -1.659404000 |
| 1 | 4.636077000 | 0.454849000  | -2.915118000 |
| 1 | 3.220796000 | 1.522048000  | -2.999658000 |
| 6 | 3.945178000 | -0.873970000 | -0.561703000 |
| 1 | 4.293599000 | -1.806464000 | -1.009787000 |



|    |              |              |              |
|----|--------------|--------------|--------------|
| 1  | 4.834030000  | -0.309265000 | -0.275368000 |
| 1  | 3.396355000  | -1.122782000 | 0.348527000  |
| 6  | 1.874617000  | 1.551598000  | 0.013277000  |
| 6  | 0.694657000  | 2.246427000  | 0.308109000  |
| 6  | 3.043307000  | 1.894755000  | 0.705392000  |
| 6  | 0.684002000  | 3.240164000  | 1.280455000  |
| 1  | -0.209039000 | 2.037249000  | -0.247210000 |
| 6  | 3.023273000  | 2.899620000  | 1.663621000  |
| 1  | 3.968588000  | 1.370072000  | 0.521180000  |
| 6  | 1.844789000  | 3.573388000  | 1.967793000  |
| 1  | -0.242598000 | 3.763620000  | 1.491295000  |
| 1  | 3.939219000  | 3.140319000  | 2.191868000  |
| 1  | 1.833309000  | 4.347614000  | 2.725957000  |
| 5  | -0.487358000 | -0.413163000 | -0.220595000 |
| 7  | -1.785833000 | 0.086157000  | -0.426669000 |
| 14 | -2.900610000 | 0.519885000  | 0.897655000  |
| 14 | -2.215286000 | 0.516775000  | -2.109864000 |
| 6  | -2.098635000 | 0.474749000  | 2.588049000  |
| 1  | -2.787742000 | 0.974668000  | 3.279490000  |
| 1  | -1.903202000 | -0.518152000 | 2.992796000  |
| 1  | -1.162211000 | 1.039378000  | 2.603840000  |
| 6  | -4.450517000 | -0.543432000 | 0.869934000  |
| 1  | -4.293453000 | -1.476367000 | 0.324673000  |
| 1  | -4.742752000 | -0.812444000 | 1.889916000  |
| 1  | -5.299402000 | -0.027901000 | 0.413085000  |
| 6  | -3.326351000 | 2.339675000  | 0.657671000  |
| 1  | -2.431160000 | 2.956628000  | 0.790445000  |
| 1  | -3.765665000 | 2.599494000  | -0.306926000 |
| 1  | -4.040932000 | 2.650896000  | 1.427477000  |
| 6  | -4.082377000 | 0.471041000  | -2.309097000 |
| 1  | -4.647305000 | 1.157816000  | -1.677454000 |
| 1  | -4.321754000 | 0.725644000  | -3.347440000 |
| 1  | -4.468529000 | -0.537645000 | -2.134345000 |
| 6  | -1.528453000 | 2.203745000  | -2.559309000 |
| 1  | -1.839974000 | 2.468121000  | -3.575688000 |
| 1  | -1.869676000 | 3.003445000  | -1.896450000 |
| 1  | -0.433354000 | 2.205108000  | -2.552906000 |
| 6  | -1.536510000 | -0.741575000 | -3.319477000 |
| 1  | -0.490046000 | -0.567853000 | -3.573936000 |
| 1  | -1.619334000 | -1.765575000 | -2.945729000 |
| 1  | -2.112677000 | -0.685309000 | -4.249415000 |
| 28 | 0.405664000  | -1.680485000 | 1.223237000  |
| 6  | -1.216130000 | -2.510512000 | 1.475636000  |
| 6  | 1.547598000  | -2.958772000 | 0.477788000  |
| 6  | 1.107068000  | -0.616086000 | 2.586915000  |
| 8  | -2.255141000 | -2.976094000 | 1.443475000  |

|   |             |              |              |
|---|-------------|--------------|--------------|
| 8 | 1.489227000 | 0.066380000  | 3.410609000  |
| 8 | 2.146703000 | -3.759304000 | -0.062260000 |

**2i** (TE = -3354.088386, H = -3354.044303)

|    |              |              |              |
|----|--------------|--------------|--------------|
| 6  | -3.323866000 | 1.411676000  | -1.030663000 |
| 6  | -1.259283000 | 0.295327000  | -1.000701000 |
| 6  | -2.796445000 | 1.142312000  | -2.448567000 |
| 1  | -2.486571000 | 2.059750000  | -2.953691000 |
| 1  | -3.505235000 | 0.600634000  | -3.073817000 |
| 7  | -2.106848000 | 1.036182000  | -0.258697000 |
| 6  | -4.495445000 | 0.505944000  | -0.660922000 |
| 1  | -4.792387000 | 0.658866000  | 0.378927000  |
| 1  | -5.356432000 | 0.736237000  | -1.293608000 |
| 1  | -4.243545000 | -0.546793000 | -0.798766000 |
| 6  | -3.684303000 | 2.876234000  | -0.825559000 |
| 1  | -4.508152000 | 3.147794000  | -1.490411000 |
| 1  | -4.012088000 | 3.058505000  | 0.200184000  |
| 1  | -2.835408000 | 3.525432000  | -1.047301000 |
| 6  | -2.079924000 | 1.066957000  | 1.171725000  |
| 6  | -1.752563000 | 2.252317000  | 1.826975000  |
| 6  | -2.423746000 | -0.070321000 | 1.902048000  |
| 6  | -1.756030000 | 2.295831000  | 3.217953000  |
| 1  | -1.499883000 | 3.131108000  | 1.243129000  |
| 6  | -2.426355000 | -0.020110000 | 3.291339000  |
| 1  | -2.677845000 | -0.983703000 | 1.376041000  |
| 6  | -2.090848000 | 1.160122000  | 3.949420000  |
| 1  | -1.498182000 | 3.217198000  | 3.727749000  |
| 1  | -2.685629000 | -0.906700000 | 3.858953000  |
| 1  | -2.089107000 | 1.194021000  | 5.033194000  |
| 5  | -0.086722000 | -0.545001000 | -0.523380000 |
| 15 | 1.738530000  | -0.038153000 | -0.632200000 |
| 7  | 2.483411000  | -0.259027000 | 0.902483000  |
| 7  | 1.777034000  | 1.623082000  | -1.043455000 |
| 6  | 3.439054000  | -1.368583000 | 1.090688000  |
| 1  | 3.700624000  | -1.353964000 | 2.151936000  |
| 6  | 1.891361000  | 0.287142000  | 2.137155000  |
| 1  | 1.208838000  | 1.079524000  | 1.820930000  |
| 6  | 1.002139000  | 2.658140000  | -0.354351000 |
| 1  | 0.320606000  | 2.124428000  | 0.307402000  |
| 6  | 2.768325000  | 2.100435000  | -2.025373000 |
| 1  | 2.616968000  | 3.180108000  | -2.105462000 |
| 6  | 2.951431000  | 0.939658000  | 3.030673000  |
| 1  | 2.470446000  | 1.571192000  | 3.783304000  |
| 1  | 3.549037000  | 0.199852000  | 3.569742000  |

|    |              |              |              |
|----|--------------|--------------|--------------|
| 1  | 3.633032000  | 1.559460000  | 2.444285000  |
| 6  | 1.070988000  | -0.732583000 | 2.926422000  |
| 1  | 0.613053000  | -0.261337000 | 3.800756000  |
| 1  | 0.274200000  | -1.144681000 | 2.305951000  |
| 1  | 1.694557000  | -1.557822000 | 3.283544000  |
| 6  | 4.729747000  | -1.158134000 | 0.305323000  |
| 1  | 5.456517000  | -1.936790000 | 0.554268000  |
| 1  | 4.542698000  | -1.216559000 | -0.770161000 |
| 1  | 5.172814000  | -0.185663000 | 0.529783000  |
| 6  | 2.854899000  | -2.748226000 | 0.781016000  |
| 1  | 1.895750000  | -2.901998000 | 1.277755000  |
| 1  | 2.700583000  | -2.861265000 | -0.294592000 |
| 1  | 3.541869000  | -3.537475000 | 1.101683000  |
| 6  | 0.134399000  | 3.465724000  | -1.323407000 |
| 1  | -0.527829000 | 4.138946000  | -0.769914000 |
| 1  | 0.731619000  | 4.089375000  | -1.993978000 |
| 1  | -0.476584000 | 2.800739000  | -1.937963000 |
| 6  | 1.857360000  | 3.584868000  | 0.511933000  |
| 1  | 2.539147000  | 4.187048000  | -0.096422000 |
| 1  | 1.226850000  | 4.279111000  | 1.076932000  |
| 1  | 2.455323000  | 3.011789000  | 1.222333000  |
| 6  | 2.522960000  | 1.501889000  | -3.409396000 |
| 1  | 1.499344000  | 1.698895000  | -3.737883000 |
| 1  | 3.213191000  | 1.926576000  | -4.144287000 |
| 1  | 2.669078000  | 0.418740000  | -3.396870000 |
| 6  | 4.212353000  | 1.881884000  | -1.577100000 |
| 1  | 4.367408000  | 2.247404000  | -0.559190000 |
| 1  | 4.466381000  | 0.820910000  | -1.598188000 |
| 1  | 4.907064000  | 2.402962000  | -2.242819000 |
| 8  | -1.627853000 | 0.314778000  | -2.284199000 |
| 28 | -0.805666000 | -2.496043000 | -0.524822000 |
| 6  | -0.884134000 | -3.236078000 | 1.170848000  |
| 6  | -2.416006000 | -2.525465000 | -1.469124000 |
| 6  | 0.461765000  | -3.138053000 | -1.719427000 |
| 8  | -3.314429000 | -2.510117000 | -2.169135000 |
| 8  | -0.955250000 | -3.630075000 | 2.236109000  |
| 8  | 1.212533000  | -3.407142000 | -2.528329000 |

Cartesian coordinates of the optimized geometries of the Fe and Ni based MOLPs for the ligands L (L=**a-i**).are given along with their total energies (TE) and Gibbs free enthalpies (H) in hartrees including zero point vibrational correction.

**1a-GaCl<sub>3</sub>** (TE = 5135.810450, H = -5135.789706)

|    |              |              |              |
|----|--------------|--------------|--------------|
| 26 | -0.017246000 | -0.029775000 | 0.176520000  |
| 6  | 1.861183000  | 0.032065000  | -0.161465000 |
| 6  | -0.066097000 | 1.879838000  | 0.340018000  |
| 6  | -0.075438000 | -1.864099000 | -0.379264000 |
| 6  | -1.915908000 | 0.009311000  | -0.006967000 |
| 6  | 0.070436000  | -0.389990000 | 2.042777000  |
| 8  | 2.968316000  | 0.065925000  | -0.342082000 |
| 8  | 0.136122000  | -0.605992000 | 3.141285000  |
| 8  | -0.170629000 | -2.944885000 | -0.662279000 |
| 8  | -3.035308000 | 0.023360000  | -0.078266000 |
| 8  | -0.147730000 | 2.989936000  | 0.475090000  |
| 31 | 0.042179000  | 0.453461000  | -2.351603000 |
| 17 | -1.985485000 | 0.650415000  | -3.209207000 |
| 17 | 1.142731000  | -1.216826000 | -3.319680000 |
| 17 | 1.193411000  | 2.332123000  | -2.643112000 |

**1b-GaCl<sub>3</sub>** (TE = -5483.468118, H = -5483.442289)

|    |              |              |              |
|----|--------------|--------------|--------------|
| 15 | -1.877954000 | -1.214104000 | -0.051522000 |
| 6  | -3.596840000 | -1.076252000 | 0.564062000  |
| 1  | -4.055581000 | -2.065791000 | 0.621697000  |
| 1  | -3.611840000 | -0.629855000 | 1.561248000  |
| 1  | -4.198994000 | -0.458171000 | -0.104823000 |
| 6  | -1.204323000 | -2.553385000 | 0.987748000  |
| 1  | -1.880098000 | -3.411286000 | 0.948466000  |
| 1  | -0.220279000 | -2.862799000 | 0.636589000  |
| 1  | -1.116527000 | -2.226589000 | 2.025696000  |
| 6  | -2.102205000 | -1.968974000 | -1.695458000 |
| 1  | -2.633902000 | -1.279557000 | -2.355023000 |
| 1  | -1.134694000 | -2.212018000 | -2.136030000 |
| 1  | -2.687431000 | -2.886573000 | -1.601992000 |
| 26 | -0.776215000 | 0.883279000  | -0.013991000 |
| 6  | -0.387745000 | 0.696907000  | -1.836300000 |
| 6  | -2.413279000 | 1.784263000  | -0.136397000 |
| 6  | -0.720442000 | 0.691043000  | 1.847235000  |
| 6  | 0.239546000  | 2.474613000  | 0.090337000  |
| 8  | -0.177769000 | 0.588617000  | -2.938871000 |

|    |              |              |              |
|----|--------------|--------------|--------------|
| 8  | -0.750945000 | 0.579565000  | 2.968445000  |
| 8  | -3.379587000 | 2.358556000  | -0.192081000 |
| 8  | 0.785509000  | 3.453033000  | 0.171815000  |
| 31 | 1.480834000  | -0.279228000 | 0.048843000  |
| 17 | 2.036838000  | -1.072745000 | 2.060298000  |
| 17 | 1.536907000  | -2.042058000 | -1.349433000 |
| 17 | 3.089695000  | 1.103481000  | -0.650581000 |

**1c-GaCl<sub>3</sub>** (TE = -5327.174125, H = -5327.148345)

|    |              |              |              |
|----|--------------|--------------|--------------|
| 6  | 1.834123000  | -0.385121000 | 0.153747000  |
| 7  | 1.932729000  | -1.558808000 | 0.826842000  |
| 7  | 2.892806000  | -0.413266000 | -0.702257000 |
| 6  | 3.006984000  | -2.302996000 | 0.390056000  |
| 1  | 3.234053000  | -3.271459000 | 0.802901000  |
| 6  | 3.612244000  | -1.584082000 | -0.576140000 |
| 1  | 4.474555000  | -1.793103000 | -1.187081000 |
| 6  | 3.277673000  | 0.573490000  | -1.703685000 |
| 1  | 4.362580000  | 0.669353000  | -1.698216000 |
| 1  | 2.949447000  | 0.255577000  | -2.693650000 |
| 1  | 2.850264000  | 1.545444000  | -1.480049000 |
| 6  | 1.078578000  | -2.048841000 | 1.902174000  |
| 1  | 1.156459000  | -3.133693000 | 1.928123000  |
| 1  | 1.401394000  | -1.643882000 | 2.861760000  |
| 1  | 0.036693000  | -1.803490000 | 1.722114000  |
| 26 | 0.377926000  | 1.109354000  | 0.256020000  |
| 6  | 1.706266000  | 2.400805000  | 0.574506000  |
| 6  | 0.300709000  | 1.017592000  | -1.613370000 |
| 6  | 0.042572000  | 0.760202000  | 2.077797000  |
| 6  | -1.079495000 | 2.328717000  | 0.271574000  |
| 8  | 2.496848000  | 3.169020000  | 0.802373000  |
| 8  | 0.281255000  | 0.946298000  | -2.740397000 |
| 8  | -0.142102000 | 0.636130000  | 3.182026000  |
| 8  | -1.938312000 | 3.053799000  | 0.309167000  |
| 31 | -1.484698000 | -0.554582000 | -0.247983000 |
| 17 | -0.639115000 | -2.419875000 | -1.163119000 |
| 17 | -2.981862000 | 0.298513000  | -1.678175000 |
| 17 | -2.632204000 | -1.153459000 | 1.583509000  |

**1d-GaCl<sub>3</sub>** (TE = -5621.774752, H = -5621.741491)

|   |              |             |              |
|---|--------------|-------------|--------------|
| 6 | -1.227089000 | 3.116042000 | 0.028142000  |
| 6 | -2.160093000 | 1.917146000 | 0.176370000  |
| 6 | 0.075141000  | 1.072506000 | -0.186424000 |

|    |              |              |              |
|----|--------------|--------------|--------------|
| 6  | 0.119782000  | 2.578865000  | -0.495782000 |
| 1  | -1.648115000 | 3.875547000  | -0.633833000 |
| 1  | -1.071592000 | 3.574765000  | 1.007371000  |
| 7  | -1.161829000 | 0.779172000  | 0.123389000  |
| 6  | -1.679317000 | -0.545225000 | 0.344954000  |
| 6  | -2.003114000 | -1.336370000 | -0.754768000 |
| 6  | -1.889862000 | -1.001339000 | 1.642079000  |
| 6  | -2.513935000 | -2.613260000 | -0.552323000 |
| 1  | -1.862714000 | -0.945479000 | -1.757078000 |
| 6  | -2.408851000 | -2.277164000 | 1.834722000  |
| 1  | -1.610579000 | -0.379046000 | 2.482951000  |
| 6  | -2.715016000 | -3.083782000 | 0.743015000  |
| 1  | -2.758589000 | -3.236096000 | -1.404959000 |
| 1  | -2.555132000 | -2.645265000 | 2.843375000  |
| 1  | -3.109415000 | -4.081059000 | 0.900453000  |
| 6  | 1.242665000  | 3.375833000  | 0.172504000  |
| 6  | 0.216547000  | 2.716404000  | -2.027467000 |
| 1  | 0.144191000  | 3.772744000  | -2.298096000 |
| 1  | 1.165593000  | 2.346682000  | -2.421788000 |
| 1  | -0.585985000 | 2.182224000  | -2.542276000 |
| 6  | -3.155635000 | 1.767694000  | -0.972736000 |
| 1  | -3.746478000 | 0.854805000  | -0.872480000 |
| 1  | -3.848182000 | 2.612241000  | -0.954710000 |
| 1  | -2.661873000 | 1.758740000  | -1.946182000 |
| 6  | -2.897626000 | 1.939437000  | 1.510779000  |
| 1  | -3.595000000 | 1.106192000  | 1.613468000  |
| 1  | -2.195834000 | 1.928036000  | 2.347007000  |
| 1  | -3.474538000 | 2.865985000  | 1.567395000  |
| 26 | 1.631340000  | -0.277510000 | -0.459175000 |
| 6  | 0.841919000  | -1.728130000 | 0.495835000  |
| 6  | 0.965239000  | -0.688087000 | -2.155199000 |
| 6  | 2.859493000  | 1.038995000  | -1.036343000 |
| 8  | 0.577861000  | -2.702094000 | 0.995789000  |
| 8  | 0.579974000  | -0.911625000 | -3.190265000 |
| 8  | 3.704619000  | 1.662090000  | -1.446319000 |
| 6  | 3.161727000  | -1.401039000 | -0.452951000 |
| 8  | 4.068508000  | -2.067518000 | -0.462650000 |
| 31 | 2.368239000  | 0.336233000  | 1.867622000  |
| 17 | 3.118423000  | -1.469466000 | 2.977238000  |
| 17 | 4.003098000  | 1.864179000  | 1.998398000  |
| 17 | 0.652915000  | 1.141139000  | 3.104499000  |
| 1  | 2.236609000  | 3.179761000  | -0.220256000 |
| 1  | 1.047073000  | 4.438908000  | 0.002317000  |
| 1  | 1.262152000  | 3.214979000  | 1.250899000  |

**1e-GaCl<sub>3</sub>** (TE = -5579.178651, H = -5579.147764)

|    |              |              |              |
|----|--------------|--------------|--------------|
| 6  | 1.040647000  | 2.896857000  | 1.018687000  |
| 6  | 2.343709000  | 2.252808000  | 0.537287000  |
| 6  | 0.645452000  | 0.654583000  | 0.839933000  |
| 1  | 1.163943000  | 3.529507000  | 1.895463000  |
| 1  | 0.520488000  | 3.437144000  | 0.226241000  |
| 7  | 1.832764000  | 0.860979000  | 0.306663000  |
| 6  | 2.639180000  | -0.147143000 | -0.311365000 |
| 6  | 3.301595000  | -1.076464000 | 0.486481000  |
| 6  | 2.755225000  | -0.181199000 | -1.697676000 |
| 6  | 4.070926000  | -2.067981000 | -0.112802000 |
| 1  | 3.218723000  | -1.009769000 | 1.566218000  |
| 6  | 3.536075000  | -1.168810000 | -2.288118000 |
| 1  | 2.207210000  | 0.535299000  | -2.298688000 |
| 6  | 4.187893000  | -2.112679000 | -1.499451000 |
| 1  | 4.582225000  | -2.798845000 | 0.502987000  |
| 1  | 3.619290000  | -1.209574000 | -3.367823000 |
| 1  | 4.787572000  | -2.885723000 | -1.966143000 |
| 6  | 3.410530000  | 2.208751000  | 1.626567000  |
| 1  | 4.269458000  | 1.613185000  | 1.309097000  |
| 1  | 3.764183000  | 3.220148000  | 1.839025000  |
| 1  | 3.011620000  | 1.783026000  | 2.551401000  |
| 6  | 2.864725000  | 2.896461000  | -0.737459000 |
| 1  | 3.786978000  | 2.420311000  | -1.075712000 |
| 1  | 2.120645000  | 2.848276000  | -1.533924000 |
| 1  | 3.086485000  | 3.948054000  | -0.538721000 |
| 26 | -0.584821000 | -0.948694000 | 0.928562000  |
| 6  | 0.061558000  | -1.677305000 | -0.693889000 |
| 6  | 0.488411000  | -1.931821000 | 2.110249000  |
| 6  | -1.556486000 | 0.017975000  | 2.249659000  |
| 8  | 0.363488000  | -2.177567000 | -1.656555000 |
| 8  | 1.106194000  | -2.540441000 | 2.828376000  |
| 8  | -2.112403000 | 0.547866000  | 3.070238000  |
| 6  | -2.036996000 | -2.167398000 | 0.833188000  |
| 8  | -2.914307000 | -2.871165000 | 0.805475000  |
| 31 | -1.917023000 | 0.390062000  | -0.734452000 |
| 17 | -3.025245000 | -0.940427000 | -2.159873000 |
| 17 | -3.387788000 | 1.813830000  | 0.151809000  |
| 17 | -0.528274000 | 1.646211000  | -2.008894000 |
| 8  | 0.201081000  | 1.779177000  | 1.388699000  |

**1f-GaCl<sub>3</sub>** (TE = -6519.631072, H = -6519.582103)

|    |              |              |              |
|----|--------------|--------------|--------------|
| 6  | -4.240231000 | -0.409394000 | -1.196259000 |
| 6  | -1.968346000 | 0.269678000  | -0.844346000 |
| 6  | -2.386387000 | 0.881997000  | -2.196359000 |
| 6  | -3.917396000 | 0.721596000  | -2.176533000 |
| 1  | -4.371927000 | 1.650668000  | -1.821348000 |
| 1  | -4.312028000 | 0.517611000  | -3.173708000 |
| 7  | -2.952179000 | -0.457398000 | -0.390198000 |
| 6  | -4.509789000 | -1.750878000 | -1.872681000 |
| 1  | -4.703960000 | -2.536525000 | -1.140958000 |
| 1  | -5.406451000 | -1.651568000 | -2.488360000 |
| 1  | -3.690288000 | -2.065752000 | -2.518612000 |
| 6  | -5.404140000 | -0.053029000 | -0.277472000 |
| 1  | -6.285851000 | 0.129286000  | -0.896472000 |
| 1  | -5.641097000 | -0.861818000 | 0.416076000  |
| 1  | -5.202487000 | 0.855058000  | 0.295632000  |
| 6  | -2.003132000 | 2.351160000  | -2.364167000 |
| 1  | -0.937867000 | 2.471474000  | -2.547472000 |
| 1  | -2.531980000 | 2.741361000  | -3.238592000 |
| 1  | -2.280011000 | 2.955411000  | -1.503242000 |
| 6  | -1.752348000 | 0.101299000  | -3.363251000 |
| 1  | -2.040124000 | 0.592226000  | -4.296299000 |
| 1  | -0.661961000 | 0.110105000  | -3.308244000 |
| 1  | -2.091217000 | -0.931633000 | -3.417587000 |
| 6  | -2.959697000 | -1.223050000 | 0.834445000  |
| 6  | -3.205763000 | -0.571051000 | 2.034264000  |
| 6  | -2.830203000 | -2.610614000 | 0.790328000  |
| 6  | -3.274656000 | -1.306611000 | 3.212964000  |
| 1  | -3.345388000 | 0.502590000  | 2.042595000  |
| 6  | -2.902299000 | -3.337249000 | 1.971974000  |
| 1  | -2.676825000 | -3.121109000 | -0.150485000 |
| 6  | -3.118327000 | -2.686750000 | 3.183699000  |
| 1  | -3.445204000 | -0.794986000 | 4.153031000  |
| 1  | -2.782872000 | -4.413959000 | 1.943984000  |
| 1  | -3.164422000 | -3.257082000 | 4.104005000  |
| 5  | -0.424977000 | 0.475379000  | -0.357626000 |
| 7  | -0.071614000 | 1.773752000  | 0.136435000  |
| 26 | 0.732475000  | -1.404989000 | -0.579353000 |
| 6  | 0.237695000  | -1.607993000 | 1.165090000  |
| 6  | 1.633500000  | -0.816366000 | -2.059447000 |
| 6  | -0.576464000 | -2.236443000 | -1.516102000 |
| 8  | -0.036126000 | -1.792809000 | 2.252112000  |
| 8  | 2.168222000  | -0.615752000 | -3.037769000 |
| 8  | -1.288192000 | -2.870436000 | -2.132026000 |
| 14 | -0.972963000 | 2.473640000  | 1.525593000  |



|    |              |              |              |
|----|--------------|--------------|--------------|
| 14 | 1.111778000  | 2.907966000  | -0.618580000 |
| 6  | -2.752144000 | 2.903293000  | 1.038754000  |
| 1  | -2.788337000 | 3.855290000  | 0.500519000  |
| 1  | -3.268211000 | 2.164163000  | 0.422365000  |
| 1  | -3.348063000 | 3.040429000  | 1.948157000  |
| 6  | -0.976010000 | 1.369038000  | 3.044594000  |
| 1  | -0.898633000 | 0.300148000  | 2.865871000  |
| 1  | -0.123336000 | 1.638806000  | 3.670697000  |
| 1  | -1.881546000 | 1.549936000  | 3.634428000  |
| 6  | -0.214422000 | 4.058822000  | 2.182942000  |
| 1  | -0.934375000 | 4.436419000  | 2.920516000  |
| 1  | 0.706433000  | 3.852572000  | 2.731535000  |
| 1  | -0.028541000 | 4.869001000  | 1.478804000  |
| 6  | 2.596699000  | 3.441792000  | 0.383972000  |
| 1  | 3.060421000  | 4.261950000  | -0.179221000 |
| 1  | 2.377996000  | 3.813203000  | 1.383654000  |
| 1  | 3.343945000  | 2.654141000  | 0.475954000  |
| 6  | 0.139729000  | 4.479448000  | -1.072012000 |
| 1  | 0.701437000  | 5.366490000  | -0.762404000 |
| 1  | 0.013353000  | 4.552490000  | -2.156291000 |
| 1  | -0.854569000 | 4.559890000  | -0.629883000 |
| 6  | 1.817168000  | 2.281459000  | -2.234885000 |
| 1  | 1.114701000  | 1.805965000  | -2.922333000 |
| 1  | 2.204781000  | 3.170500000  | -2.747360000 |
| 1  | 2.671759000  | 1.623266000  | -2.084955000 |
| 6  | 1.716036000  | -2.982357000 | -0.585634000 |
| 8  | 2.244670000  | -3.973680000 | -0.677050000 |
| 31 | 2.714920000  | -0.594007000 | 0.774469000  |
| 17 | 3.628977000  | -2.343178000 | 1.883904000  |
| 17 | 4.404933000  | 0.225721000  | -0.464322000 |
| 17 | 2.317432000  | 0.856637000  | 2.443518000  |

**1g-GaCl<sub>3</sub>** (TE = -6571.037870, H = -6570.983227)

|   |              |              |              |
|---|--------------|--------------|--------------|
| 6 | -3.638355000 | -2.511018000 | -0.915612000 |
| 6 | -1.841467000 | -0.917488000 | -1.037335000 |
| 6 | -2.557643000 | -0.856161000 | -2.406275000 |
| 6 | -3.879748000 | -1.591160000 | -2.114864000 |
| 1 | -4.648387000 | -0.856645000 | -1.858032000 |
| 1 | -4.225379000 | -2.144540000 | -2.990014000 |
| 7 | -2.396462000 | -1.876019000 | -0.330256000 |
| 6 | -3.400664000 | -3.968025000 | -1.310759000 |
| 1 | -3.274888000 | -4.605958000 | -0.435485000 |
| 1 | -4.283187000 | -4.325336000 | -1.846142000 |
| 1 | -2.536862000 | -4.090819000 | -1.963827000 |

|    |              |              |              |
|----|--------------|--------------|--------------|
| 6  | -4.770719000 | -2.440663000 | 0.104673000  |
| 1  | -5.694009000 | -2.772764000 | -0.376002000 |
| 1  | -4.583438000 | -3.090715000 | 0.961642000  |
| 1  | -4.923898000 | -1.422265000 | 0.467461000  |
| 6  | -2.859608000 | 0.541131000  | -2.936925000 |
| 1  | -1.966264000 | 1.018431000  | -3.338367000 |
| 1  | -3.570184000 | 0.441833000  | -3.762470000 |
| 1  | -3.320018000 | 1.181185000  | -2.181973000 |
| 6  | -1.724149000 | -1.583533000 | -3.477517000 |
| 1  | -2.219808000 | -1.454801000 | -4.442881000 |
| 1  | -0.719588000 | -1.161261000 | -3.562214000 |
| 1  | -1.638032000 | -2.652091000 | -3.292997000 |
| 6  | -1.985086000 | -2.262616000 | 0.992480000  |
| 6  | -2.196476000 | -1.361197000 | 2.024030000  |
| 6  | -1.464787000 | -3.531320000 | 1.240682000  |
| 6  | -1.901090000 | -1.728361000 | 3.331713000  |
| 1  | -2.589133000 | -0.385027000 | 1.774039000  |
| 6  | -1.168634000 | -3.888646000 | 2.551336000  |
| 1  | -1.281338000 | -4.224939000 | 0.430674000  |
| 6  | -1.393214000 | -2.995079000 | 3.595641000  |
| 1  | -2.063293000 | -1.022208000 | 4.138596000  |
| 1  | -0.748531000 | -4.866800000 | 2.754334000  |
| 1  | -1.154324000 | -3.282716000 | 4.612825000  |
| 5  | -0.566189000 | -0.084784000 | -0.655983000 |
| 15 | -0.478122000 | 1.599052000  | 0.325749000  |
| 26 | 1.350819000  | -1.273182000 | -0.785685000 |
| 6  | 2.856310000  | -2.341469000 | -1.094253000 |
| 8  | 3.694436000  | -3.010578000 | -1.440097000 |
| 7  | -0.122670000 | 2.846698000  | -0.786652000 |
| 7  | -1.958708000 | 1.934702000  | 1.157897000  |
| 6  | -3.122171000 | 2.538572000  | 0.488353000  |
| 6  | -3.524675000 | 3.923828000  | 1.001753000  |
| 6  | -4.331268000 | 1.596923000  | 0.408187000  |
| 1  | -2.807942000 | 2.695757000  | -0.541028000 |
| 1  | -2.662177000 | 4.590532000  | 1.049519000  |
| 1  | -4.255937000 | 4.365684000  | 0.318503000  |
| 1  | -3.984472000 | 3.895407000  | 1.990134000  |
| 1  | -4.012440000 | 0.607581000  | 0.066200000  |
| 1  | -4.845883000 | 1.480799000  | 1.362717000  |
| 1  | -5.062167000 | 1.981016000  | -0.310871000 |
| 6  | -1.856744000 | 1.899614000  | 2.644795000  |
| 6  | -3.162685000 | 1.566142000  | 3.377389000  |
| 6  | -1.246147000 | 3.155531000  | 3.271001000  |
| 1  | -1.156546000 | 1.084784000  | 2.857345000  |
| 1  | -3.660730000 | 0.665331000  | 3.020775000  |
| 1  | -2.928454000 | 1.413809000  | 4.433944000  |

|    |              |              |              |
|----|--------------|--------------|--------------|
| 1  | -3.884660000 | 2.382330000  | 3.334956000  |
| 1  | -0.251130000 | 3.339796000  | 2.872751000  |
| 1  | -1.861310000 | 4.042179000  | 3.107623000  |
| 1  | -1.144265000 | 3.014749000  | 4.350887000  |
| 6  | -0.894605000 | 3.134253000  | -2.009759000 |
| 6  | -0.103012000 | 2.949920000  | -3.301529000 |
| 6  | -1.548604000 | 4.523352000  | -1.996816000 |
| 1  | 0.295256000  | 1.938863000  | -3.386701000 |
| 1  | -0.750913000 | 3.136328000  | -4.163883000 |
| 1  | 0.733326000  | 3.649860000  | -3.369909000 |
| 1  | -1.962202000 | 4.766799000  | -1.017869000 |
| 1  | -0.848158000 | 5.315028000  | -2.272764000 |
| 1  | -2.361921000 | 4.552800000  | -2.728333000 |
| 6  | 1.013663000  | 3.778142000  | -0.571040000 |
| 6  | 2.340648000  | 3.138884000  | -0.952048000 |
| 6  | 1.065675000  | 4.349655000  | 0.837878000  |
| 1  | 0.830720000  | 4.615284000  | -1.249029000 |
| 1  | 2.358478000  | 2.812601000  | -1.992251000 |
| 1  | 3.178990000  | 3.821670000  | -0.788761000 |
| 1  | 2.509341000  | 2.272763000  | -0.318459000 |
| 1  | 0.099195000  | 4.768848000  | 1.128288000  |
| 1  | 1.359724000  | 3.584900000  | 1.558155000  |
| 1  | 1.814448000  | 5.144525000  | 0.885204000  |
| 1  | -1.693318000 | 2.406468000  | -2.018703000 |
| 6  | 0.408595000  | -2.685335000 | -1.438476000 |
| 6  | 1.119293000  | -1.467839000 | 1.020213000  |
| 6  | 1.780191000  | -0.193548000 | -2.196715000 |
| 8  | 0.953357000  | -1.574723000 | 2.138602000  |
| 8  | -0.052949000 | -3.661904000 | -1.785320000 |
| 8  | 2.055418000  | 0.413104000  | -3.114957000 |
| 31 | 3.306983000  | -0.128250000 | 0.517441000  |
| 17 | 2.992872000  | 1.345524000  | 2.163047000  |
| 17 | 4.828861000  | 0.636988000  | -0.936925000 |
| 17 | 4.344536000  | -1.830290000 | 1.600894000  |

**1h-GaCl<sub>3</sub>** (TE = -6477.039679, H = -6476.992596)

|   |             |              |              |
|---|-------------|--------------|--------------|
| 6 | 2.862340000 | -2.006416000 | -2.467153000 |
| 6 | 1.727299000 | -0.604107000 | -1.080701000 |
| 6 | 3.758975000 | -1.765621000 | -1.240694000 |
| 1 | 2.469854000 | -3.022154000 | -2.518283000 |
| 1 | 3.338804000 | -1.744045000 | -3.409613000 |
| 8 | 1.726388000 | -1.113827000 | -2.293491000 |
| 7 | 2.797955000 | -0.965186000 | -0.407221000 |
| 6 | 4.979513000 | -0.913933000 | -1.571245000 |

|    |              |              |              |
|----|--------------|--------------|--------------|
| 1  | 5.507137000  | -0.619283000 | -0.661656000 |
| 1  | 5.670738000  | -1.496686000 | -2.184357000 |
| 1  | 4.707418000  | -0.016890000 | -2.129746000 |
| 6  | 4.173744000  | -3.053689000 | -0.544612000 |
| 1  | 4.774742000  | -3.651555000 | -1.233812000 |
| 1  | 4.787857000  | -2.841444000 | 0.332637000  |
| 1  | 3.314344000  | -3.649951000 | -0.239279000 |
| 6  | 3.050086000  | -0.638668000 | 0.969589000  |
| 6  | 3.723926000  | 0.533369000  | 1.291154000  |
| 6  | 2.644455000  | -1.530326000 | 1.960258000  |
| 6  | 3.994991000  | 0.815664000  | 2.626665000  |
| 1  | 4.018718000  | 1.215734000  | 0.501714000  |
| 6  | 2.919544000  | -1.239674000 | 3.291491000  |
| 1  | 2.117596000  | -2.439600000 | 1.692433000  |
| 6  | 3.597270000  | -0.069654000 | 3.623247000  |
| 1  | 4.512457000  | 1.731933000  | 2.886671000  |
| 1  | 2.595339000  | -1.922630000 | 4.067690000  |
| 1  | 3.805660000  | 0.157335000  | 4.662292000  |
| 5  | 0.443042000  | 0.134642000  | -0.381870000 |
| 7  | 0.509274000  | 1.540368000  | -0.246504000 |
| 26 | -1.005493000 | -1.465776000 | -0.101617000 |
| 6  | -2.401615000 | -2.678209000 | 0.068094000  |
| 6  | 0.203278000  | -2.787601000 | -0.327762000 |
| 6  | -0.863937000 | -1.326706000 | 1.721930000  |
| 6  | -1.335483000 | -1.099010000 | -1.860167000 |
| 8  | -3.178837000 | -3.482739000 | 0.209033000  |
| 8  | 0.894178000  | -3.672465000 | -0.499272000 |
| 8  | -1.530112000 | -0.914701000 | -2.961959000 |
| 8  | -0.776930000 | -1.393632000 | 2.848676000  |
| 14 | 1.018595000  | 2.457877000  | -1.713227000 |
| 14 | 0.262516000  | 2.529584000  | 1.235917000  |
| 6  | 0.287864000  | 4.180238000  | -1.759363000 |
| 1  | 0.661402000  | 4.653557000  | -2.675117000 |
| 1  | -0.799812000 | 4.131079000  | -1.845342000 |
| 1  | 0.538713000  | 4.844917000  | -0.933530000 |
| 6  | 0.391858000  | 1.642364000  | -3.275724000 |
| 1  | 0.703768000  | 2.265546000  | -4.121965000 |
| 1  | 0.761788000  | 0.636295000  | -3.471699000 |
| 1  | -0.700144000 | 1.617317000  | -3.281951000 |
| 6  | 2.894787000  | 2.556617000  | -1.784709000 |
| 1  | 3.361245000  | 1.568787000  | -1.767716000 |
| 1  | 3.203563000  | 3.038172000  | -2.718734000 |
| 1  | 3.313880000  | 3.141298000  | -0.962256000 |
| 6  | -1.223934000 | 3.658309000  | 1.289541000  |
| 1  | -2.164204000 | 3.117857000  | 1.391493000  |
| 1  | -1.109716000 | 4.284304000  | 2.183543000  |

|    |              |              |              |
|----|--------------|--------------|--------------|
| 1  | -1.313266000 | 4.323155000  | 0.430487000  |
| 6  | 1.794288000  | 3.623021000  | 1.396829000  |
| 1  | 1.703208000  | 4.175108000  | 2.339291000  |
| 1  | 2.711995000  | 3.034745000  | 1.462123000  |
| 1  | 1.928854000  | 4.370379000  | 0.613458000  |
| 6  | 0.268903000  | 1.457324000  | 2.764574000  |
| 1  | -0.724812000 | 1.092603000  | 3.024827000  |
| 1  | 0.956406000  | 0.611584000  | 2.700090000  |
| 1  | 0.607040000  | 2.079119000  | 3.601291000  |
| 31 | -2.900973000 | 0.182461000  | -0.002568000 |
| 17 | -4.783826000 | -0.746809000 | -0.841091000 |
| 17 | -2.714371000 | 2.037400000  | -1.262992000 |
| 17 | -3.436622000 | 0.785663000  | 2.097636000  |

**li-GaCl<sub>3</sub>** (TE = -6528.456536, H = -6528.404603)

|    |              |              |              |
|----|--------------|--------------|--------------|
| 6  | 1.051285000  | -0.222428000 | 0.628804000  |
| 6  | 2.237323000  | -0.967665000 | 2.420426000  |
| 1  | 1.896531000  | -1.092347000 | 3.446645000  |
| 1  | 2.972898000  | -1.734910000 | 2.174941000  |
| 7  | 1.946419000  | 0.717531000  | 0.853747000  |
| 6  | 2.295383000  | 1.819721000  | -0.002440000 |
| 6  | 2.128239000  | 3.125794000  | 0.456873000  |
| 6  | 2.892585000  | 1.567291000  | -1.230806000 |
| 6  | 2.590481000  | 4.181464000  | -0.318969000 |
| 1  | 1.624047000  | 3.315578000  | 1.396515000  |
| 6  | 3.321400000  | 2.632805000  | -2.016683000 |
| 1  | 3.047072000  | 0.552555000  | -1.574998000 |
| 6  | 3.188371000  | 3.936456000  | -1.554031000 |
| 1  | 2.463791000  | 5.198968000  | 0.033076000  |
| 1  | 3.767909000  | 2.427885000  | -2.982552000 |
| 1  | 3.537124000  | 4.764218000  | -2.160550000 |
| 5  | 0.036424000  | -0.569012000 | -0.536074000 |
| 15 | -1.907550000 | -0.190902000 | -0.308169000 |
| 7  | -2.125860000 | 1.466221000  | -0.679150000 |
| 7  | -2.075992000 | -0.457070000 | 1.389358000  |
| 6  | -3.188003000 | 1.835793000  | -1.649898000 |
| 1  | -2.985634000 | 2.872072000  | -1.923629000 |
| 6  | -1.085987000 | 2.498053000  | -0.501849000 |
| 1  | -0.377631000 | 2.092639000  | 0.223721000  |
| 6  | -1.606756000 | 0.489913000  | 2.411283000  |
| 1  | -0.773299000 | 1.039772000  | 1.959393000  |
| 6  | -3.191257000 | -1.338700000 | 1.825679000  |
| 1  | -3.232949000 | -1.247775000 | 2.912580000  |
| 6  | -1.622664000 | 3.801254000  | 0.091790000  |

|    |              |              |              |
|----|--------------|--------------|--------------|
| 1  | -0.790388000 | 4.489845000  | 0.266966000  |
| 1  | -2.315914000 | 4.309234000  | -0.583182000 |
| 1  | -2.132108000 | 3.637132000  | 1.042089000  |
| 6  | -0.334696000 | 2.746534000  | -1.803304000 |
| 1  | 0.447822000  | 3.496543000  | -1.683359000 |
| 1  | 0.126920000  | 1.826079000  | -2.159537000 |
| 1  | -1.001126000 | 3.098870000  | -2.594972000 |
| 6  | -4.577048000 | 1.804725000  | -1.022801000 |
| 1  | -5.315038000 | 2.221707000  | -1.714220000 |
| 1  | -4.880720000 | 0.782203000  | -0.794984000 |
| 1  | -4.605492000 | 2.389456000  | -0.099490000 |
| 6  | -3.147717000 | 1.020103000  | -2.940815000 |
| 1  | -2.136013000 | 0.982257000  | -3.353826000 |
| 1  | -3.490399000 | -0.002615000 | -2.772341000 |
| 1  | -3.803219000 | 1.469544000  | -3.692065000 |
| 6  | -1.075702000 | -0.212462000 | 3.667037000  |
| 1  | -0.515302000 | 0.492483000  | 4.287528000  |
| 1  | -1.885345000 | -0.593341000 | 4.293539000  |
| 1  | -0.430755000 | -1.051767000 | 3.407877000  |
| 6  | -2.683018000 | 1.507619000  | 2.803621000  |
| 1  | -3.484828000 | 1.023244000  | 3.368745000  |
| 1  | -2.265040000 | 2.293373000  | 3.440441000  |
| 1  | -3.121853000 | 1.966607000  | 1.917979000  |
| 6  | -2.895687000 | -2.799011000 | 1.507253000  |
| 1  | -1.965691000 | -3.117318000 | 1.979730000  |
| 1  | -3.703552000 | -3.443206000 | 1.865836000  |
| 1  | -2.808162000 | -2.948312000 | 0.426780000  |
| 6  | -4.566823000 | -0.942086000 | 1.290401000  |
| 1  | -4.766013000 | 0.120741000  | 1.437892000  |
| 1  | -4.652162000 | -1.167110000 | 0.224840000  |
| 1  | -5.344359000 | -1.509377000 | 1.810236000  |
| 8  | 1.099130000  | -1.171265000 | 1.551253000  |
| 26 | 0.665225000  | -2.173672000 | -1.762759000 |
| 6  | 1.239535000  | -3.650702000 | -2.762656000 |
| 6  | 2.335526000  | -1.927453000 | -1.072176000 |
| 6  | 0.068938000  | -3.221987000 | -0.401340000 |
| 6  | -0.902433000 | -1.965158000 | -2.762143000 |
| 8  | 1.615861000  | -4.593396000 | -3.250166000 |
| 8  | -0.179663000 | -3.969508000 | 0.408430000  |
| 8  | 3.341123000  | -1.784402000 | -0.564700000 |
| 8  | -1.830348000 | -1.881516000 | -3.398208000 |
| 6  | 2.733047000  | 0.451934000  | 2.112176000  |
| 6  | 2.344394000  | 1.432125000  | 3.215429000  |
| 1  | 2.743689000  | 1.072107000  | 4.166727000  |
| 1  | 2.765524000  | 2.421810000  | 3.038980000  |
| 1  | 1.259177000  | 1.514155000  | 3.309168000  |

|    |             |              |              |
|----|-------------|--------------|--------------|
| 6  | 4.227979000 | 0.496687000  | 1.833080000  |
| 1  | 4.502691000 | -0.166828000 | 1.012159000  |
| 1  | 4.550289000 | 1.509959000  | 1.587141000  |
| 1  | 4.766935000 | 0.180764000  | 2.729768000  |
| 31 | 1.590770000 | -0.992633000 | -3.814183000 |
| 17 | 1.011172000 | -2.237936000 | -5.607524000 |
| 17 | 3.853651000 | -0.968233000 | -3.779748000 |
| 17 | 1.001648000 | 1.065334000  | -4.449232000 |

**2a-GaCl<sub>3</sub>** (TE = -5267.077050, H = -5267.056869)

|    |              |              |              |
|----|--------------|--------------|--------------|
| 28 | -0.418137000 | -0.281577000 | 0.193950000  |
| 6  | -0.420275000 | -0.306284000 | 2.150370000  |
| 6  | 1.479929000  | -0.369770000 | -0.171552000 |
| 6  | -1.431800000 | -1.882359000 | -0.194282000 |
| 6  | -1.304611000 | 1.399793000  | -0.144623000 |
| 8  | 2.595099000  | -0.437914000 | -0.274073000 |
| 8  | -1.826084000 | 2.389844000  | -0.227398000 |
| 8  | -2.039633000 | -2.818910000 | -0.304491000 |
| 8  | -0.425323000 | -0.323202000 | 3.269975000  |
| 31 | -0.423495000 | -0.243709000 | -2.389361000 |
| 17 | 0.547301000  | -2.120681000 | -2.959931000 |
| 17 | 0.721329000  | 1.549599000  | -2.901256000 |
| 17 | -2.541312000 | -0.142495000 | -2.931927000 |

**2b-GaCl<sub>3</sub>** (TE = -5614.729866, H = -5614.705070)

|    |              |              |              |
|----|--------------|--------------|--------------|
| 15 | -0.884062000 | 0.113721000  | -2.290640000 |
| 6  | -0.457321000 | 1.725615000  | -3.036006000 |
| 1  | -0.454254000 | 1.666457000  | -4.127078000 |
| 1  | -1.183149000 | 2.480762000  | -2.727397000 |
| 1  | 0.531788000  | 2.042172000  | -2.698049000 |
| 6  | -2.478660000 | -0.310842000 | -3.073904000 |
| 1  | -2.406004000 | -0.264641000 | -4.163125000 |
| 1  | -2.777390000 | -1.321172000 | -2.786448000 |
| 1  | -3.252995000 | 0.384198000  | -2.742847000 |
| 6  | 0.294226000  | -1.043879000 | -3.069990000 |
| 1  | 1.314530000  | -0.798718000 | -2.768260000 |
| 1  | 0.077570000  | -2.066015000 | -2.752732000 |
| 1  | 0.230425000  | -0.993448000 | -4.159598000 |
| 28 | -0.892324000 | 0.084396000  | 0.021737000  |
| 31 | -0.912803000 | 0.038596000  | 2.519828000  |
| 17 | -1.260132000 | -2.057700000 | 3.117221000  |
| 17 | 1.058898000  | 0.774432000  | 3.185745000  |

|    |              |              |             |
|----|--------------|--------------|-------------|
| 17 | -2.546331000 | 1.368343000  | 3.179406000 |
| 6  | 0.561583000  | -1.112061000 | 0.313378000 |
| 6  | -0.562240000 | 1.932507000  | 0.359214000 |
| 6  | -2.658732000 | -0.547255000 | 0.315698000 |
| 8  | 1.432711000  | -1.821518000 | 0.374342000 |
| 8  | -3.718851000 | -0.918673000 | 0.384185000 |
| 8  | -0.365936000 | 3.036229000  | 0.454105000 |

**2c-GaCl<sub>3</sub>** (TE = -5458.440700, H = -5458.415544)

|    |              |              |              |
|----|--------------|--------------|--------------|
| 6  | 2.516261000  | 0.010727000  | -0.005374000 |
| 7  | 3.200399000  | -1.154318000 | 0.053730000  |
| 7  | 3.474545000  | 0.963721000  | -0.011949000 |
| 6  | 4.562801000  | -0.935123000 | 0.074445000  |
| 1  | 5.274852000  | -1.742635000 | 0.119353000  |
| 6  | 4.736086000  | 0.405556000  | 0.035574000  |
| 1  | 5.630785000  | 1.005674000  | 0.042629000  |
| 6  | 3.218454000  | 2.397160000  | -0.069842000 |
| 1  | 4.167039000  | 2.923876000  | 0.013444000  |
| 1  | 2.751430000  | 2.658321000  | -1.019300000 |
| 1  | 2.576694000  | 2.696520000  | 0.757969000  |
| 6  | 2.604901000  | -2.485139000 | 0.032862000  |
| 1  | 2.606723000  | -2.882758000 | -0.982868000 |
| 1  | 3.180703000  | -3.144519000 | 0.680535000  |
| 1  | 1.581334000  | -2.434880000 | 0.399109000  |
| 28 | 0.503907000  | 0.172687000  | -0.029251000 |
| 31 | -1.980060000 | -0.099778000 | 0.027854000  |
| 17 | -2.381721000 | -2.257472000 | 0.363242000  |
| 17 | -2.815194000 | 1.143857000  | 1.663024000  |
| 17 | -2.820977000 | 0.581557000  | -1.908763000 |
| 6  | 0.011944000  | 2.069760000  | -0.344014000 |
| 6  | 0.195252000  | -0.839369000 | -1.597165000 |
| 8  | -0.294990000 | 3.137130000  | -0.517066000 |
| 8  | 0.158045000  | -1.455965000 | -2.538876000 |
| 6  | 0.216092000  | -0.323096000 | 1.764156000  |
| 8  | 0.197090000  | -0.642072000 | 2.844314000  |

**2d-GaCl<sub>3</sub>** (TE = -5753.041033, H = -5753.009075)

|   |              |              |              |
|---|--------------|--------------|--------------|
| 6 | -3.955582000 | -1.807294000 | -0.291788000 |
| 6 | -4.028757000 | -0.289954000 | -0.055139000 |
| 6 | -1.715642000 | -0.923408000 | -0.049971000 |
| 6 | -2.487883000 | -2.228221000 | -0.040207000 |
| 1 | -4.650581000 | -2.342628000 | 0.358111000  |



|    |              |              |              |
|----|--------------|--------------|--------------|
| 1  | -4.231966000 | -2.030215000 | -1.325404000 |
| 7  | -2.559630000 | 0.064713000  | -0.055230000 |
| 6  | -2.143630000 | 1.446727000  | -0.020121000 |
| 6  | -1.956702000 | 2.075721000  | 1.205123000  |
| 6  | -1.900427000 | 2.115311000  | -1.214477000 |
| 6  | -1.500542000 | 3.389477000  | 1.232467000  |
| 1  | -2.149614000 | 1.534860000  | 2.125156000  |
| 6  | -1.444394000 | 3.428199000  | -1.178080000 |
| 1  | -2.054472000 | 1.606080000  | -2.159278000 |
| 6  | -1.242090000 | 4.063494000  | 0.043344000  |
| 1  | -1.333390000 | 3.879451000  | 2.184511000  |
| 1  | -1.233703000 | 3.948767000  | -2.104832000 |
| 1  | -0.869866000 | 5.080830000  | 0.068405000  |
| 6  | -1.982503000 | -3.172744000 | -1.132622000 |
| 1  | -0.972179000 | -3.529216000 | -0.925642000 |
| 1  | -2.634402000 | -4.048310000 | -1.194243000 |
| 1  | -1.979155000 | -2.687545000 | -2.112605000 |
| 6  | -2.292730000 | -2.871680000 | 1.340881000  |
| 1  | -2.852402000 | -3.809179000 | 1.392177000  |
| 1  | -1.240279000 | -3.097720000 | 1.529489000  |
| 1  | -2.645851000 | -2.222505000 | 2.146143000  |
| 6  | -4.636220000 | 0.079540000  | 1.295324000  |
| 1  | -4.596571000 | 1.156586000  | 1.471176000  |
| 1  | -5.686466000 | -0.219828000 | 1.308100000  |
| 1  | -4.129120000 | -0.429393000 | 2.117814000  |
| 6  | -4.742463000 | 0.446800000  | -1.181588000 |
| 1  | -4.756936000 | 1.526239000  | -1.017359000 |
| 1  | -4.272968000 | 0.243466000  | -2.146879000 |
| 1  | -5.777752000 | 0.101240000  | -1.230601000 |
| 28 | 0.277227000  | -0.664103000 | -0.012679000 |
| 31 | 2.625081000  | 0.195556000  | -0.004114000 |
| 17 | 3.721819000  | -0.613179000 | -1.764945000 |
| 17 | 2.535534000  | 2.412862000  | -0.052939000 |
| 17 | 3.685032000  | -0.521868000 | 1.818417000  |
| 6  | 0.469564000  | -0.079589000 | -1.771022000 |
| 6  | 1.217357000  | -2.512954000 | 0.072052000  |
| 6  | 0.434319000  | -0.006670000 | 1.732102000  |
| 8  | 0.449141000  | 0.231317000  | -2.854858000 |
| 8  | 1.803765000  | -3.469700000 | 0.106136000  |
| 8  | 0.406421000  | 0.335794000  | 2.805995000  |

**2e-GaCl<sub>3</sub>** (TE = -5710.432747, H = -5710.402835)

|   |             |              |              |
|---|-------------|--------------|--------------|
| 6 | 3.258766000 | -2.782593000 | 0.210748000  |
| 6 | 3.924103000 | -1.414624000 | -0.004248000 |

|    |              |              |              |
|----|--------------|--------------|--------------|
| 6  | 1.575305000  | -1.248397000 | 0.025822000  |
| 1  | 3.559823000  | -3.532744000 | -0.518130000 |
| 1  | 3.402617000  | -3.167659000 | 1.221401000  |
| 7  | 2.696868000  | -0.559069000 | 0.051124000  |
| 6  | 2.740707000  | 0.874602000  | 0.018422000  |
| 6  | 2.709402000  | 1.537529000  | -1.204434000 |
| 6  | 2.789644000  | 1.581524000  | 1.215131000  |
| 6  | 2.711344000  | 2.928033000  | -1.226083000 |
| 1  | 2.668306000  | 0.965102000  | -2.124933000 |
| 6  | 2.791296000  | 2.971836000  | 1.185584000  |
| 1  | 2.807725000  | 1.043077000  | 2.156620000  |
| 6  | 2.750045000  | 3.643307000  | -0.032783000 |
| 1  | 2.670589000  | 3.450445000  | -2.174642000 |
| 1  | 2.813165000  | 3.528731000  | 2.114932000  |
| 1  | 2.739938000  | 4.726930000  | -0.052236000 |
| 6  | 4.574838000  | -1.292917000 | -1.378063000 |
| 1  | 4.939016000  | -0.278435000 | -1.552116000 |
| 1  | 5.429159000  | -1.971007000 | -1.440874000 |
| 1  | 3.870578000  | -1.554770000 | -2.171805000 |
| 6  | 4.893448000  | -1.054792000 | 1.111400000  |
| 1  | 5.312969000  | -0.057734000 | 0.962767000  |
| 1  | 4.402064000  | -1.087909000 | 2.086036000  |
| 1  | 5.720538000  | -1.768459000 | 1.121499000  |
| 28 | -0.308378000 | -0.574803000 | 0.001038000  |
| 31 | -2.685122000 | 0.181424000  | 0.007400000  |
| 17 | -3.657158000 | -0.569700000 | 1.853240000  |
| 17 | -2.693694000 | 2.398838000  | -0.051035000 |
| 17 | -3.690942000 | -0.662742000 | -1.779799000 |
| 6  | -0.338525000 | 0.472337000  | 1.600445000  |
| 6  | -1.200779000 | -2.276212000 | 0.041530000  |
| 6  | -0.379759000 | 0.364374000  | -1.669219000 |
| 8  | -0.287746000 | 1.046154000  | 2.567358000  |
| 8  | -1.615371000 | -3.320575000 | 0.065290000  |
| 8  | -0.362089000 | 0.873042000  | -2.673000000 |
| 8  | 1.836496000  | -2.544185000 | 0.041442000  |

**2f-GaCl<sub>3</sub>** (TE = -6650.928086, H = -6650.879625)

|   |             |             |              |
|---|-------------|-------------|--------------|
| 6 | 2.263697000 | 3.213615000 | -0.963566000 |
| 6 | 1.678872000 | 0.905060000 | -0.818344000 |
| 6 | 2.192957000 | 1.091440000 | -2.249699000 |
| 6 | 2.890840000 | 2.466069000 | -2.157456000 |
| 1 | 3.959869000 | 2.323886000 | -1.974636000 |
| 1 | 2.785385000 | 3.033892000 | -3.083363000 |
| 7 | 1.664627000 | 2.061620000 | -0.197737000 |

|    |              |              |              |
|----|--------------|--------------|--------------|
| 6  | 1.202343000  | 4.232459000  | -1.374198000 |
| 1  | 0.800807000  | 4.760292000  | -0.507875000 |
| 1  | 1.665053000  | 4.978916000  | -2.023706000 |
| 1  | 0.375878000  | 3.777796000  | -1.920092000 |
| 6  | 3.315056000  | 3.894389000  | -0.093023000 |
| 1  | 3.839192000  | 4.643992000  | -0.690511000 |
| 1  | 2.859718000  | 4.402533000  | 0.759724000  |
| 1  | 4.052461000  | 3.180352000  | 0.280537000  |
| 6  | 3.141850000  | -0.028839000 | -2.684274000 |
| 1  | 2.648196000  | -1.004078000 | -2.647171000 |
| 1  | 3.453190000  | 0.146471000  | -3.717135000 |
| 1  | 4.042741000  | -0.070659000 | -2.073796000 |
| 6  | 1.031936000  | 1.131808000  | -3.260043000 |
| 1  | 1.450081000  | 1.288295000  | -4.257630000 |
| 1  | 0.475704000  | 0.193389000  | -3.272027000 |
| 1  | 0.335538000  | 1.945663000  | -3.066298000 |
| 6  | 1.189574000  | 2.220046000  | 1.151698000  |
| 6  | 1.902416000  | 1.651350000  | 2.202104000  |
| 6  | 0.011143000  | 2.923781000  | 1.394978000  |
| 6  | 1.439820000  | 1.796043000  | 3.505645000  |
| 1  | 2.815954000  | 1.108184000  | 1.999526000  |
| 6  | -0.446661000 | 3.059192000  | 2.700831000  |
| 1  | -0.564301000 | 3.339016000  | 0.577724000  |
| 6  | 0.267873000  | 2.501095000  | 3.756256000  |
| 1  | 1.994530000  | 1.349332000  | 4.322826000  |
| 1  | -1.376223000 | 3.584025000  | 2.885349000  |
| 1  | -0.098720000 | 2.601728000  | 4.771066000  |
| 5  | 1.113813000  | -0.451368000 | -0.286613000 |
| 7  | 1.868845000  | -1.549399000 | 0.176835000  |
| 14 | 3.621012000  | -1.538800000 | 0.591205000  |
| 14 | 1.094437000  | -3.190872000 | 0.150604000  |
| 6  | 3.812795000  | -2.004529000 | 2.400195000  |
| 1  | 4.773817000  | -1.636170000 | 2.773357000  |
| 1  | 3.027339000  | -1.536888000 | 3.003999000  |
| 1  | 3.784034000  | -3.075024000 | 2.600114000  |
| 6  | 4.548839000  | -2.713234000 | -0.545735000 |
| 1  | 4.137577000  | -3.720283000 | -0.613949000 |
| 1  | 4.603627000  | -2.317371000 | -1.563873000 |
| 1  | 5.579111000  | -2.813989000 | -0.186139000 |
| 6  | 2.028615000  | -4.449837000 | 1.191695000  |
| 1  | 3.098802000  | -4.563159000 | 1.025267000  |
| 1  | 1.861318000  | -4.285036000 | 2.259414000  |
| 1  | 1.572368000  | -5.418297000 | 0.954519000  |
| 6  | 1.149636000  | -3.744605000 | -1.641023000 |
| 1  | 0.486432000  | -4.598433000 | -1.811911000 |
| 1  | 0.851752000  | -2.955898000 | -2.335159000 |

|    |              |              |              |
|----|--------------|--------------|--------------|
| 1  | 2.161025000  | -4.054989000 | -1.920936000 |
| 6  | -0.623362000 | -3.309142000 | 0.876732000  |
| 1  | -1.442289000 | -2.872086000 | 0.311370000  |
| 1  | -0.839241000 | -4.381611000 | 0.952686000  |
| 1  | -0.671298000 | -2.917589000 | 1.895783000  |
| 6  | 4.511436000  | 0.125566000  | 0.428848000  |
| 1  | 4.004698000  | 0.925107000  | -0.103607000 |
| 1  | 4.779269000  | 0.509721000  | 1.416793000  |
| 1  | 5.456741000  | -0.052665000 | -0.095324000 |
| 28 | -0.974215000 | -0.200671000 | -0.462229000 |
| 6  | -1.391815000 | -1.399104000 | -1.822506000 |
| 6  | -0.961569000 | -0.229128000 | 1.349477000  |
| 6  | -1.482986000 | 1.536368000  | -1.268198000 |
| 31 | -3.401933000 | -0.224998000 | 0.050658000  |
| 17 | -4.082207000 | -1.995395000 | 1.219277000  |
| 17 | -3.857014000 | 1.625784000  | 1.245608000  |
| 17 | -4.594654000 | -0.107175000 | -1.837179000 |
| 8  | -1.616483000 | -2.110352000 | -2.672457000 |
| 8  | -0.871094000 | -0.280996000 | 2.478271000  |
| 8  | -1.923144000 | 2.459877000  | -1.744839000 |

**2g-GaCl<sub>3</sub>** (TE = -6702.346478, H = -6702.293178)

|   |              |              |              |
|---|--------------|--------------|--------------|
| 6 | -1.475620000 | -4.010869000 | -0.624116000 |
| 6 | -1.133197000 | -1.655531000 | -0.851907000 |
| 6 | -1.501214000 | -2.150094000 | -2.258042000 |
| 6 | -2.053732000 | -3.561753000 | -1.972164000 |
| 1 | -3.144025000 | -3.516537000 | -1.897049000 |
| 1 | -1.803389000 | -4.262126000 | -2.771013000 |
| 7 | -1.116994000 | -2.680378000 | -0.018995000 |
| 6 | -0.227209000 | -4.884373000 | -0.742249000 |
| 1 | 0.165345000  | -5.144917000 | 0.242748000  |
| 1 | -0.485517000 | -5.815422000 | -1.251587000 |
| 1 | 0.567669000  | -4.398193000 | -1.309795000 |
| 6 | -2.521347000 | -4.714913000 | 0.233267000  |
| 1 | -2.862830000 | -5.609522000 | -0.293051000 |
| 1 | -2.115678000 | -5.028790000 | 1.197006000  |
| 1 | -3.388293000 | -4.072963000 | 0.406370000  |
| 6 | -2.552102000 | -1.264822000 | -2.920134000 |
| 1 | -2.146960000 | -0.285632000 | -3.182499000 |
| 1 | -2.901517000 | -1.745462000 | -3.838060000 |
| 1 | -3.409226000 | -1.116067000 | -2.265959000 |
| 6 | -0.267775000 | -2.209808000 | -3.173209000 |
| 1 | -0.586470000 | -2.564427000 | -4.156944000 |
| 1 | 0.186029000  | -1.226520000 | -3.305388000 |

|    |              |              |              |
|----|--------------|--------------|--------------|
| 1  | 0.493095000  | -2.897988000 | -2.808398000 |
| 6  | -0.672460000 | -2.623430000 | 1.351714000  |
| 6  | -1.595728000 | -2.474460000 | 2.382521000  |
| 6  | 0.680037000  | -2.796564000 | 1.639162000  |
| 6  | -1.155892000 | -2.446829000 | 3.701941000  |
| 1  | -2.650939000 | -2.403039000 | 2.152393000  |
| 6  | 1.113403000  | -2.770754000 | 2.959727000  |
| 1  | 1.392174000  | -2.954732000 | 0.839699000  |
| 6  | 0.197853000  | -2.586388000 | 3.990741000  |
| 1  | -1.875949000 | -2.323518000 | 4.502809000  |
| 1  | 2.169298000  | -2.883369000 | 3.175818000  |
| 1  | 0.539242000  | -2.557220000 | 5.018951000  |
| 5  | -0.737736000 | -0.213318000 | -0.502622000 |
| 15 | -1.836258000 | 1.269704000  | -0.562295000 |
| 7  | -3.396938000 | 0.980380000  | 0.057881000  |
| 7  | -1.156236000 | 2.667307000  | 0.116814000  |
| 6  | -1.072177000 | 2.801606000  | 1.587599000  |
| 6  | -2.255647000 | 3.545353000  | 2.218420000  |
| 6  | 0.236251000  | 3.426567000  | 2.073821000  |
| 1  | -1.104207000 | 1.772834000  | 1.965860000  |
| 1  | -3.206600000 | 3.145396000  | 1.872123000  |
| 1  | -2.218855000 | 3.437442000  | 3.307047000  |
| 1  | -2.229381000 | 4.613268000  | 1.998100000  |
| 1  | 1.115841000  | 3.004553000  | 1.589844000  |
| 1  | 0.248040000  | 4.506377000  | 1.910768000  |
| 1  | 0.332206000  | 3.262436000  | 3.150260000  |
| 6  | -0.775224000 | 3.777556000  | -0.790091000 |
| 6  | 0.739827000  | 4.021227000  | -0.896549000 |
| 6  | -1.464665000 | 5.115222000  | -0.503136000 |
| 1  | -1.114503000 | 3.445437000  | -1.776010000 |
| 1  | 1.313212000  | 3.105274000  | -0.769447000 |
| 1  | 0.979347000  | 4.440503000  | -1.877745000 |
| 1  | 1.100432000  | 4.728605000  | -0.148513000 |
| 1  | -2.546784000 | 5.025534000  | -0.419224000 |
| 1  | -1.082030000 | 5.575925000  | 0.409689000  |
| 1  | -1.243491000 | 5.805791000  | -1.321997000 |
| 6  | -3.651372000 | -0.010037000 | 1.120363000  |
| 6  | -4.523238000 | -1.170168000 | 0.635538000  |
| 6  | -4.225739000 | 0.592570000  | 2.403852000  |
| 1  | -4.078830000 | -1.663126000 | -0.233812000 |
| 1  | -4.651364000 | -1.914680000 | 1.426266000  |
| 1  | -5.526125000 | -0.831701000 | 0.361383000  |
| 1  | -3.518129000 | 1.280321000  | 2.866182000  |
| 1  | -5.163751000 | 1.127619000  | 2.232398000  |
| 1  | -4.435937000 | -0.202032000 | 3.126049000  |
| 6  | -4.580644000 | 1.609347000  | -0.572849000 |

|    |              |              |              |
|----|--------------|--------------|--------------|
| 6  | -4.997815000 | 0.957685000  | -1.892670000 |
| 6  | -4.400220000 | 3.107050000  | -0.798485000 |
| 1  | -5.400546000 | 1.483752000  | 0.140555000  |
| 1  | -5.219774000 | -0.103746000 | -1.780307000 |
| 1  | -5.895823000 | 1.445713000  | -2.281915000 |
| 1  | -4.208638000 | 1.070437000  | -2.641572000 |
| 1  | -4.158118000 | 3.629973000  | 0.125072000  |
| 1  | -3.604985000 | 3.301239000  | -1.524711000 |
| 1  | -5.321360000 | 3.534755000  | -1.201955000 |
| 1  | -2.669417000 | -0.409266000 | 1.372529000  |
| 6  | 2.200542000  | -1.621100000 | -1.153885000 |
| 6  | 1.301102000  | 0.321733000  | 1.227474000  |
| 6  | 1.332355000  | 1.057259000  | -2.150235000 |
| 8  | 1.200386000  | 0.436804000  | 2.349974000  |
| 8  | 2.775372000  | -2.530416000 | -1.492387000 |
| 8  | 1.254299000  | 1.577032000  | -3.149374000 |
| 31 | 3.659866000  | 0.721313000  | -0.189895000 |
| 17 | 3.914596000  | 2.739510000  | 0.711076000  |
| 17 | 4.565533000  | -0.795753000 | 1.198714000  |
| 17 | 4.768166000  | 0.641438000  | -2.128102000 |
| 28 | 1.320277000  | 0.045583000  | -0.566186000 |

**2h-GaCl<sub>3</sub>** (TE = -6608.316393, H = -6608.270520)

|   |              |             |              |
|---|--------------|-------------|--------------|
| 6 | -1.939210000 | 2.539376000 | -2.503213000 |
| 6 | -1.587333000 | 1.025857000 | -0.848865000 |
| 6 | -1.932993000 | 3.317218000 | -1.174843000 |
| 1 | -1.074241000 | 2.763045000 | -3.127596000 |
| 1 | -2.856077000 | 2.674344000 | -3.075470000 |
| 8 | -1.857356000 | 1.138338000 | -2.135363000 |
| 7 | -1.531145000 | 2.203605000 | -0.255295000 |
| 6 | -3.315443000 | 3.815686000 | -0.767934000 |
| 1 | -3.287424000 | 4.238292000 | 0.239107000  |
| 1 | -3.639592000 | 4.601820000 | -1.453724000 |
| 1 | -4.054208000 | 3.012612000 | -0.787431000 |
| 6 | -0.936822000 | 4.468355000 | -1.213682000 |
| 1 | -1.225665000 | 5.145795000 | -2.021168000 |
| 1 | -0.951046000 | 5.039457000 | -0.284596000 |
| 1 | 0.078957000  | 4.124721000 | -1.411879000 |
| 6 | -1.233196000 | 2.360942000 | 1.136369000  |
| 6 | -2.026868000 | 1.723073000 | 2.085744000  |
| 6 | -0.115065000 | 3.100258000 | 1.521172000  |
| 6 | -1.709815000 | 1.844129000 | 3.435141000  |
| 1 | -2.881775000 | 1.136703000 | 1.769182000  |
| 6 | 0.180606000  | 3.230237000 | 2.872378000  |

|    |              |              |              |
|----|--------------|--------------|--------------|
| 1  | 0.540056000  | 3.535018000  | 0.776456000  |
| 6  | -0.615655000 | 2.606764000  | 3.828914000  |
| 1  | -2.321910000 | 1.342713000  | 4.175834000  |
| 1  | 1.057657000  | 3.791047000  | 3.172988000  |
| 1  | -0.369015000 | 2.698102000  | 4.880297000  |
| 5  | -1.147881000 | -0.375424000 | -0.219639000 |
| 7  | -2.073766000 | -1.394404000 | 0.064630000  |
| 6  | 1.229065000  | 1.172574000  | -1.464547000 |
| 6  | 1.178078000  | 0.091438000  | 1.525506000  |
| 6  | 1.000737000  | -1.879758000 | -1.141203000 |
| 8  | 1.381853000  | 2.015836000  | -2.203360000 |
| 8  | 0.955326000  | -2.861160000 | -1.701842000 |
| 8  | 1.330129000  | 0.284228000  | 2.629705000  |
| 14 | -3.620895000 | -1.430443000 | -0.859868000 |
| 14 | -1.692748000 | -2.827639000 | 1.090034000  |
| 6  | -4.811449000 | -2.725298000 | -0.215465000 |
| 1  | -5.631695000 | -2.779251000 | -0.940580000 |
| 1  | -4.401092000 | -3.733617000 | -0.133728000 |
| 1  | -5.252994000 | -2.454056000 | 0.745697000  |
| 6  | -3.199657000 | -1.846350000 | -2.634365000 |
| 1  | -4.097112000 | -1.839475000 | -3.261876000 |
| 1  | -2.491343000 | -1.133775000 | -3.064116000 |
| 1  | -2.752478000 | -2.841350000 | -2.716729000 |
| 6  | -4.521425000 | 0.219132000  | -0.768798000 |
| 1  | -4.307181000 | 0.857933000  | -1.627467000 |
| 1  | -5.599087000 | 0.025617000  | -0.779177000 |
| 1  | -4.316328000 | 0.779626000  | 0.146440000  |
| 6  | -1.646745000 | -4.374778000 | 0.024425000  |
| 1  | -0.615990000 | -4.629318000 | -0.236892000 |
| 1  | -2.057224000 | -5.230465000 | 0.569986000  |
| 1  | -2.202664000 | -4.286499000 | -0.911601000 |
| 6  | -3.026960000 | -2.927168000 | 2.417337000  |
| 1  | -2.573639000 | -3.270213000 | 3.352600000  |
| 1  | -3.469402000 | -1.946903000 | 2.620781000  |
| 1  | -3.837942000 | -3.617849000 | 2.183233000  |
| 6  | -0.089476000 | -2.715161000 | 2.039091000  |
| 1  | 0.829695000  | -2.642847000 | 1.456957000  |
| 1  | -0.102815000 | -1.910914000 | 2.778314000  |
| 1  | -0.022409000 | -3.652612000 | 2.605578000  |
| 28 | 0.904773000  | -0.262458000 | -0.260394000 |
| 31 | 3.355829000  | -0.380935000 | -0.251806000 |
| 17 | 4.071277000  | -2.005646000 | 1.096676000  |
| 17 | 4.128493000  | -0.744497000 | -2.315829000 |
| 17 | 4.160498000  | 1.590665000  | 0.456566000  |

**2i-GaCl<sub>3</sub>** (TE = -6659.732752, H = -6659.681401)

|    |              |              |              |
|----|--------------|--------------|--------------|
| 6  | -0.960965000 | -1.382675000 | -1.008890000 |
| 6  | -1.168252000 | -3.022288000 | -2.565353000 |
| 1  | -2.091240000 | -3.085152000 | -3.141952000 |
| 1  | -0.334944000 | -3.395553000 | -3.159159000 |
| 7  | -1.222375000 | -2.479485000 | -0.317867000 |
| 6  | -1.213035000 | -2.535649000 | 1.116158000  |
| 6  | -2.417818000 | -2.548549000 | 1.814245000  |
| 6  | 0.005589000  | -2.612391000 | 1.787438000  |
| 6  | -2.398518000 | -2.624472000 | 3.203170000  |
| 1  | -3.356302000 | -2.513909000 | 1.271329000  |
| 6  | 0.015108000  | -2.684305000 | 3.176029000  |
| 1  | 0.934218000  | -2.616585000 | 1.225511000  |
| 6  | -1.184759000 | -2.688797000 | 3.881555000  |
| 1  | -3.332479000 | -2.633201000 | 3.753241000  |
| 1  | 0.961049000  | -2.736695000 | 3.702217000  |
| 1  | -1.173185000 | -2.742376000 | 4.964190000  |
| 5  | -0.589780000 | 0.012967000  | -0.428422000 |
| 15 | -1.764235000 | 1.496213000  | -0.535420000 |
| 7  | -2.000166000 | 2.190168000  | 1.008680000  |
| 7  | -3.228123000 | 0.925449000  | -1.198843000 |
| 6  | -1.368627000 | 3.487967000  | 1.337734000  |
| 1  | -1.621084000 | 3.676338000  | 2.383509000  |
| 6  | -2.498265000 | 1.400236000  | 2.152413000  |
| 1  | -3.023569000 | 0.545424000  | 1.723673000  |
| 6  | -4.051520000 | -0.128033000 | -0.591469000 |
| 1  | -3.404790000 | -0.617503000 | 0.139605000  |
| 6  | -3.885711000 | 1.731474000  | -2.252242000 |
| 1  | -4.807182000 | 1.200328000  | -2.500757000 |
| 6  | -3.527328000 | 2.181486000  | 2.976517000  |
| 1  | -4.119380000 | 1.489735000  | 3.581976000  |
| 1  | -3.059227000 | 2.885952000  | 3.668084000  |
| 1  | -4.208400000 | 2.741926000  | 2.332094000  |
| 6  | -1.389268000 | 0.847368000  | 3.041432000  |
| 1  | -1.811916000 | 0.314577000  | 3.897547000  |
| 1  | -0.766716000 | 0.141740000  | 2.487117000  |
| 1  | -0.752656000 | 1.646983000  | 3.430298000  |
| 6  | -1.943875000 | 4.635258000  | 0.514604000  |
| 1  | -1.544152000 | 5.589518000  | 0.867964000  |
| 1  | -1.666606000 | 4.535750000  | -0.538462000 |
| 1  | -3.032571000 | 4.667526000  | 0.587931000  |
| 6  | 0.155901000  | 3.479113000  | 1.234330000  |
| 1  | 0.597644000  | 2.655161000  | 1.796006000  |
| 1  | 0.471385000  | 3.396637000  | 0.191870000  |
| 1  | 0.572776000  | 4.411767000  | 1.624274000  |



|    |              |              |              |
|----|--------------|--------------|--------------|
| 6  | -4.451006000 | -1.197381000 | -1.610893000 |
| 1  | -4.947502000 | -2.031011000 | -1.105662000 |
| 1  | -5.153276000 | -0.820604000 | -2.358022000 |
| 1  | -3.572840000 | -1.574760000 | -2.139824000 |
| 6  | -5.284511000 | 0.404998000  | 0.140397000  |
| 1  | -6.004926000 | 0.835507000  | -0.561223000 |
| 1  | -5.794178000 | -0.401306000 | 0.676980000  |
| 1  | -5.013003000 | 1.178511000  | 0.860113000  |
| 6  | -3.036849000 | 1.790571000  | -3.519262000 |
| 1  | -2.795325000 | 0.784832000  | -3.871246000 |
| 1  | -3.570341000 | 2.317872000  | -4.314859000 |
| 1  | -2.098165000 | 2.320908000  | -3.338638000 |
| 6  | -4.278131000 | 3.132076000  | -1.785212000 |
| 1  | -4.806575000 | 3.099060000  | -0.829702000 |
| 1  | -3.393305000 | 3.758717000  | -1.662391000 |
| 1  | -4.926242000 | 3.615374000  | -2.521876000 |
| 8  | -0.918619000 | -1.615478000 | -2.305193000 |
| 6  | 1.701247000  | 0.235428000  | 1.560144000  |
| 6  | 1.969545000  | -1.340546000 | -1.264791000 |
| 6  | 1.580493000  | 1.678702000  | -1.422876000 |
| 8  | 2.205091000  | -2.241068000 | -1.907578000 |
| 8  | 1.834406000  | 0.235845000  | 2.683114000  |
| 8  | 1.596258000  | 2.528272000  | -2.163426000 |
| 6  | -1.279398000 | -3.698717000 | -1.182549000 |
| 6  | -2.598511000 | -4.435193000 | -0.995028000 |
| 1  | -2.656526000 | -5.263050000 | -1.705473000 |
| 1  | -2.667985000 | -4.854833000 | 0.010843000  |
| 1  | -3.450391000 | -3.776494000 | -1.165612000 |
| 6  | -0.102956000 | -4.620248000 | -0.881943000 |
| 1  | 0.852912000  | -4.107292000 | -0.991712000 |
| 1  | -0.170885000 | -5.022419000 | 0.130797000  |
| 1  | -0.117239000 | -5.462437000 | -1.577646000 |
| 28 | 1.455805000  | 0.178322000  | -0.267684000 |
| 31 | 3.916751000  | 0.404995000  | -0.146472000 |
| 17 | 4.446252000  | 2.281931000  | 0.919354000  |
| 17 | 4.784254000  | 0.454908000  | -2.195968000 |
| 17 | 4.720776000  | -1.374306000 | 0.944447000  |
